# Supplementary material for: Regiocontrolled synthesis of (hetero)aryl and alkenyl dehydropyrrolidines, dehydropiperidines and azepenes by Ru-catalyzed, heteroatom-directed α-C–H activation/cross-coupling of cyclic enamides with boronic acids
Source: Royal Society of Chemistry journal article supplement (doi:10.1039/c5ob02263k), 2015-11-27
Supplement: c5ob02263k1.pdf [file c5ob02263k1.pdf]

Supporting Information for:

Regiocontrolled synthesis of hetero(aryl) and alkenyl dehydropyrrolidines, dehydropiperidines and azepenes by Ru-catalyzed heteroatom-directed  $\alpha$ -C-H activation/cross-coupling of cyclic enamides with boronic acids

*Timothy K. Beng\**, Spencer Langevin, Hannah Braunstein and Monique Khim

*Department of Chemistry, Central Washington University,  
Ellensburg, WA 98926, USA*

[TimothyB@cwu.edu](mailto:TimothyB@cwu.edu)

*Contents:*

|                                                         |     |
|---------------------------------------------------------|-----|
| 1. General Experimental Information and Procedures..... | S2  |
| 2. Arylation of <b>1a</b> .....                         | S3  |
| 3. Arylation of <b>1b</b> .....                         | S13 |
| 4. Arylation of <b>1c-e</b> .....                       | S16 |
| 5. Arylation of <b>1f</b> .....                         | S42 |
| 6. Arylation of <b>1g</b> .....                         | S49 |
| 7. Alkenylation of <b>1c</b> and <b>1f</b> .....        | S51 |
| 8. Functionalization of coupling products .....         | S54 |
| 9. References .....                                     | S68 |

## 2. Experimental Section

All experiments involving air and moisture-sensitive reagents were carried out under an inert atmosphere of argon or nitrogen and using freshly distilled solvents. Et<sub>2</sub>O and THF were distilled either from sodium benzophenone ketyl or using the Grubbs system. All electrophiles that were not newly purchased were distilled immediately before use. TMEDA was distilled on a short path, over CaH<sub>2</sub>. Column chromatography was performed on silica gel (230-400 mesh). Thin-layer chromatography (TLC) was performed on silica plates. Visualization of the TLC plates was aided by UV irradiation at 254 nm or by KMnO<sub>4</sub>, CAM, and *p*-anisaldehyde staining. All reported cold temperatures were internal to a reaction vessel. Unless otherwise indicated, <sup>1</sup>H, <sup>13</sup>C, and DEPT-135, COSY 45 and HMQC (or HSQC) spectra were acquired using C<sub>6</sub>D<sub>6</sub> or CDCl<sub>3</sub> as solvent at room temperature. Chemical shifts are quoted in parts per million (ppm).

### (General) Representative Procedure A: Ru-catalyzed arylation

A mixture of *enamide 1a* (111 mg, 1.00 mmol), phenylboronic acid (183 mg, 1.50 mmol, 1.5 equiv), [RuCl<sub>2</sub>(*p*-cymene)]<sub>2</sub> (6 mg, 2.0 mol %) and Cu(OTf)<sub>2</sub> (362 mg, 1.0 mmol, 1.0 equiv), Ag<sub>2</sub>O (347 mg, 1.5 mmol, 1.5 equiv) in dioxane (5.0 mL) was stirred at 80 °C under nitrogen atmosphere for 18 h. After cooling to room temperature, the reaction mixture was diluted with saturated aq. NH<sub>4</sub>Cl solution (25 mL) and extracted with EtOAc (3 x 25 mL). The combined organic phase was washed with brine (15 mL) and dried over Na<sub>2</sub>SO<sub>4</sub>. After filtration and evaporation of the solvents *in vacuo*, the crude product was purified by flash chromatography on silica.

### General Procedure B: Catalytic hydrogenation

EtOAc was added to a flask containing 10% Pd/C at room temperature. The flask was degassed and placed under an inert atmosphere of nitrogen. A solution of the *enamide* in EtOAc was added. After complete addition, the nitrogen line was cut off and then replaced with a balloon of hydrogen. After complete consumption of the *enamide* (based on LC-MS and TLC monitoring), the mixture was filtered through a plug of Celite and concentrated under reduced pressure.

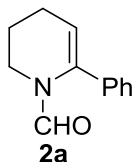

Prepared from **1a** (111 mg, 1.0 mmol) and phenyl boronic acid (183 mg, 1.5 equiv), using General Procedure A. T = 80 °C, time = 18 h; Purification: Flash chromatography on silica (pretreated with 1% Et<sub>3</sub>N) eluting with hexane/EtOAc (70:30). Yield = 133 mg, 70%. <sup>1</sup>H NMR (400 MHz, C<sub>6</sub>D<sub>6</sub>) δ 8.39 (1H), 7.07 to 6.98 (5H), 4.76 (1H), 3.66 to 3.63 (2H), 1.72 to 1.68 (2H), 1.37 to 1.28 (2H). <sup>13</sup>C NMR (101 MHz, C<sub>6</sub>D<sub>6</sub>) δ 160.4, 138.5, 137.0, 128.5, 128.0, 127.8, 111.4, 39.0, 23.0, 21.9. HRMS calc for C<sub>12</sub>H<sub>13</sub>NO 187.0997, found 187.0995. Data as previously reported by us.<sup>1</sup>

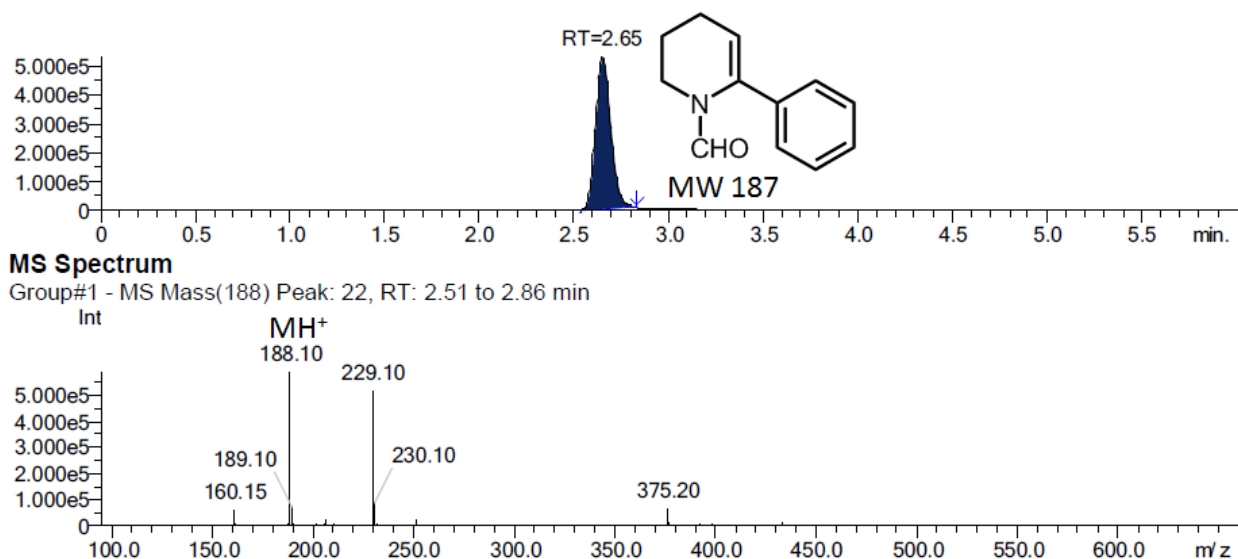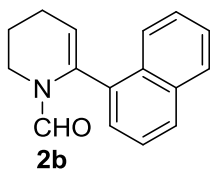

Prepared from **1a** (111 mg, 1.0 mmol) and 1-naphthyl boronic acid (258 mg, 1.5 equiv), using General Procedure A. T = 80 °C, time = 18 h; Purification: Flash chromatography on silica (pretreated with 1% Et<sub>3</sub>N) eluting with hexane/EtOAc (80:20). Yield = 149 mg, 63%. <sup>1</sup>H NMR (400 MHz, C<sub>6</sub>D<sub>6</sub>) δ 8.12 (1H), 7.85 (1H), 7.72 (2H), 7.59 to 7.00 (4H), 4.79 (1H), 3.82 (2H, br), 1.81 to 1.77 (2H), 1.47 to 1.41 (2H). <sup>13</sup>C NMR (101 MHz, C<sub>6</sub>D<sub>6</sub>) δ 160.6, 139.3, 137.3, 134.4,

134.3, 133.8, 132.3, 129.7, 129.1, 128.8, 128.6, 128.5, 128.4, 128.3, 128.2, 128.1, 127.5, 127.3, 126.8, 126.7, 126.4, 126.0, 125.9, 125.6, 112.0, 39.6, 23.5, 22.0. HRMS calc for  $C_{16}H_{15}NO$  237.1154, found 237.1158.

**MS Chromatogram**

Group#1 Scan(+) ESI : TIC

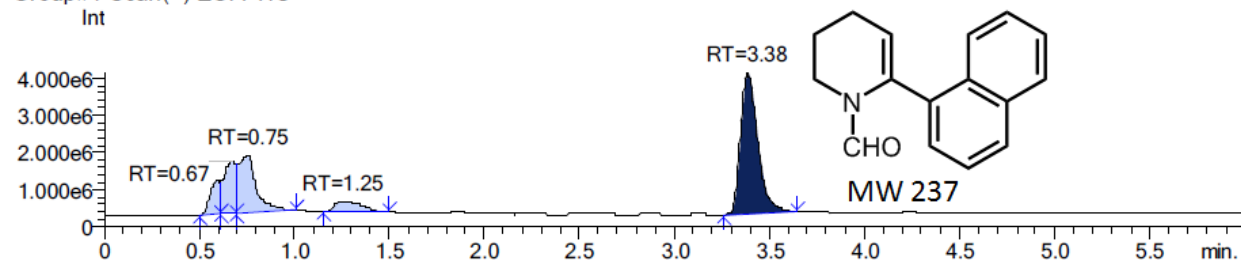**MS Spectrum**

Group#1 - MS Peak: 19, RT: 3.26 to 3.64 min

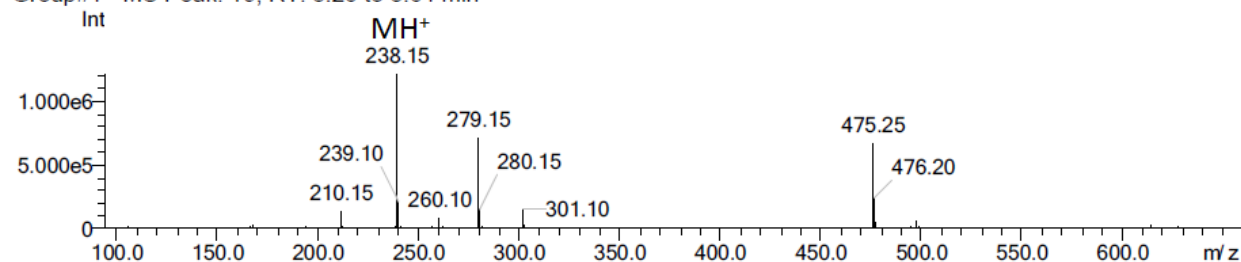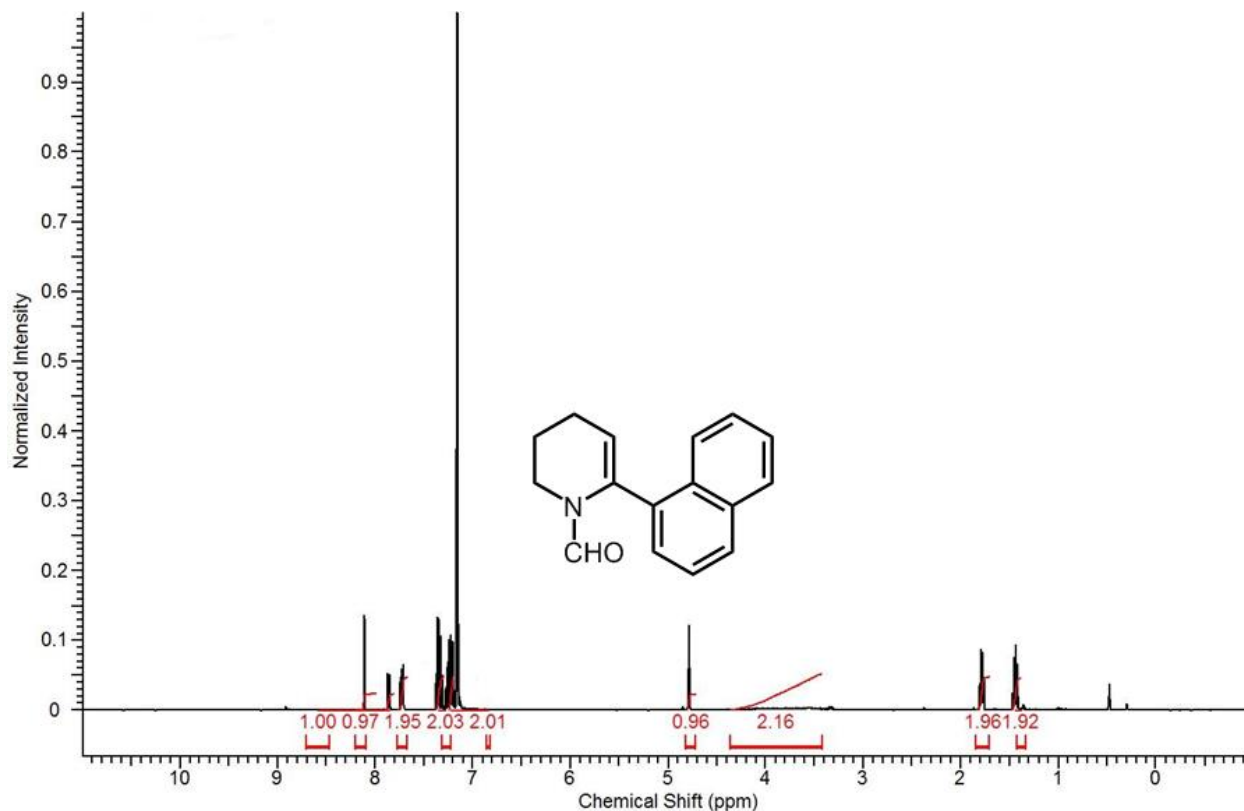

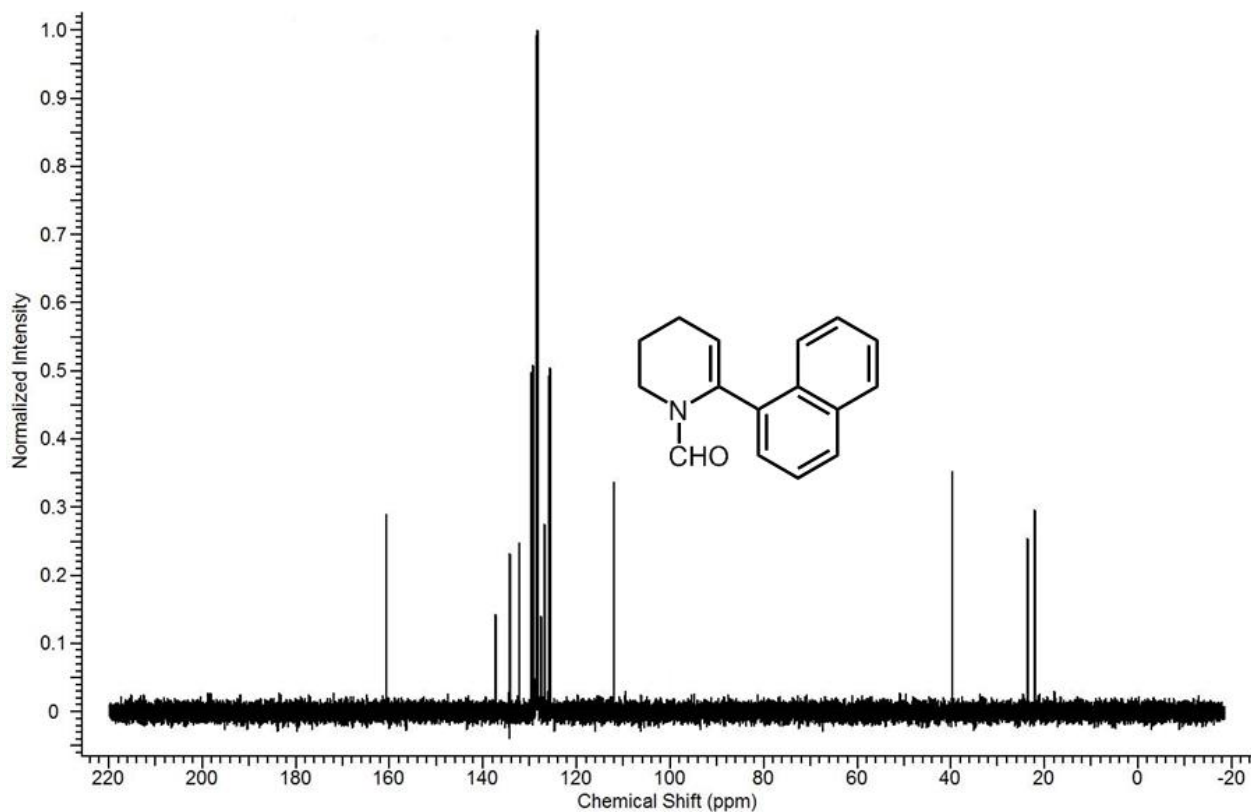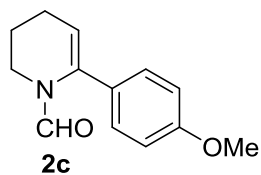

Prepared from **1a** (111 mg, 1.0 mmol) and 4-methoxyphenylboronic acid (229 mg, 1.5 equiv) using **General Procedure A**. Purification: Flash chromatography on silica (pretreated with 1% Et<sub>3</sub>N) eluting with hexane/EtOAc (50:50). Yield = 173.6 mg, 80%. <sup>1</sup>H NMR (400 MHz, C<sub>6</sub>D<sub>6</sub>) δ 8.43 (1H), 7.04 to 7.01 (2H), 6.68 to 6.65 (2H), 4.81 to 4.79 (1H), 3.69 to 3.66 (2H), 3.33 (3H), 1.82 to 1.78 (2H), 1.43, 1.36 (2H). <sup>13</sup>C NMR (101 MHz, C<sub>6</sub>D<sub>6</sub>) δ 160.6, 159.7, 138.2, 133.5, 129.1, 129.1, 114.0, 110.4, 54.6, 39.1, 23.0, 22.1. HRMS calc for C<sub>13</sub>H<sub>15</sub>NO<sub>2</sub> 217.1103, found 217.1106. Data as previously reported by us.<sup>1</sup>

**MS Chromatogram**

Group#1 Scan(+) ESI : TIC  
Int

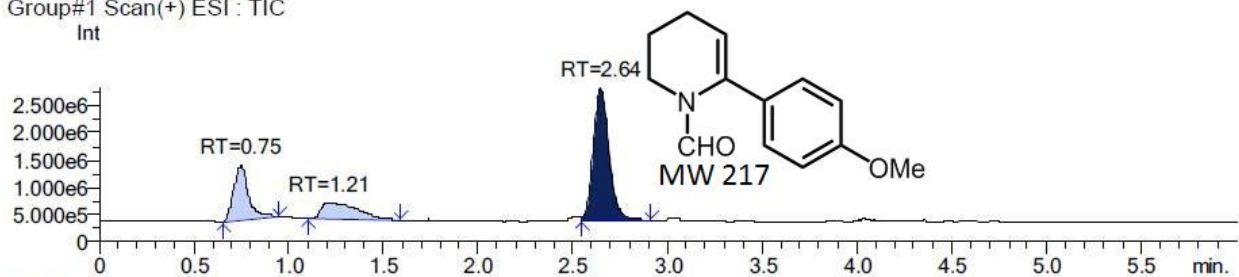

**MS Spectrum**

Group#1 - MS Peak: 17, RT: 2.54 to 2.90 min

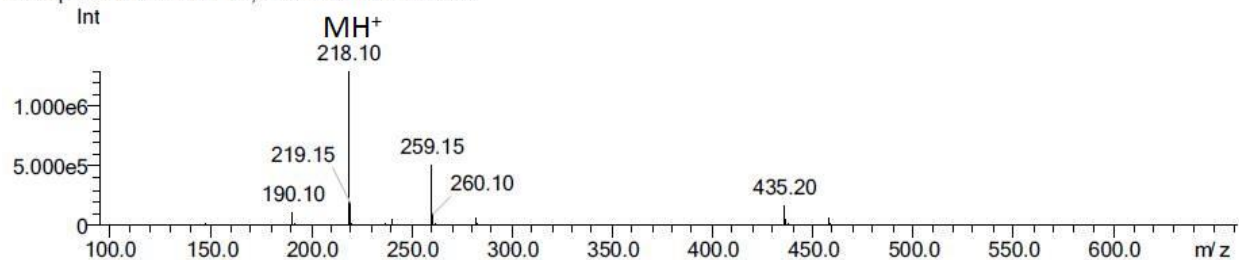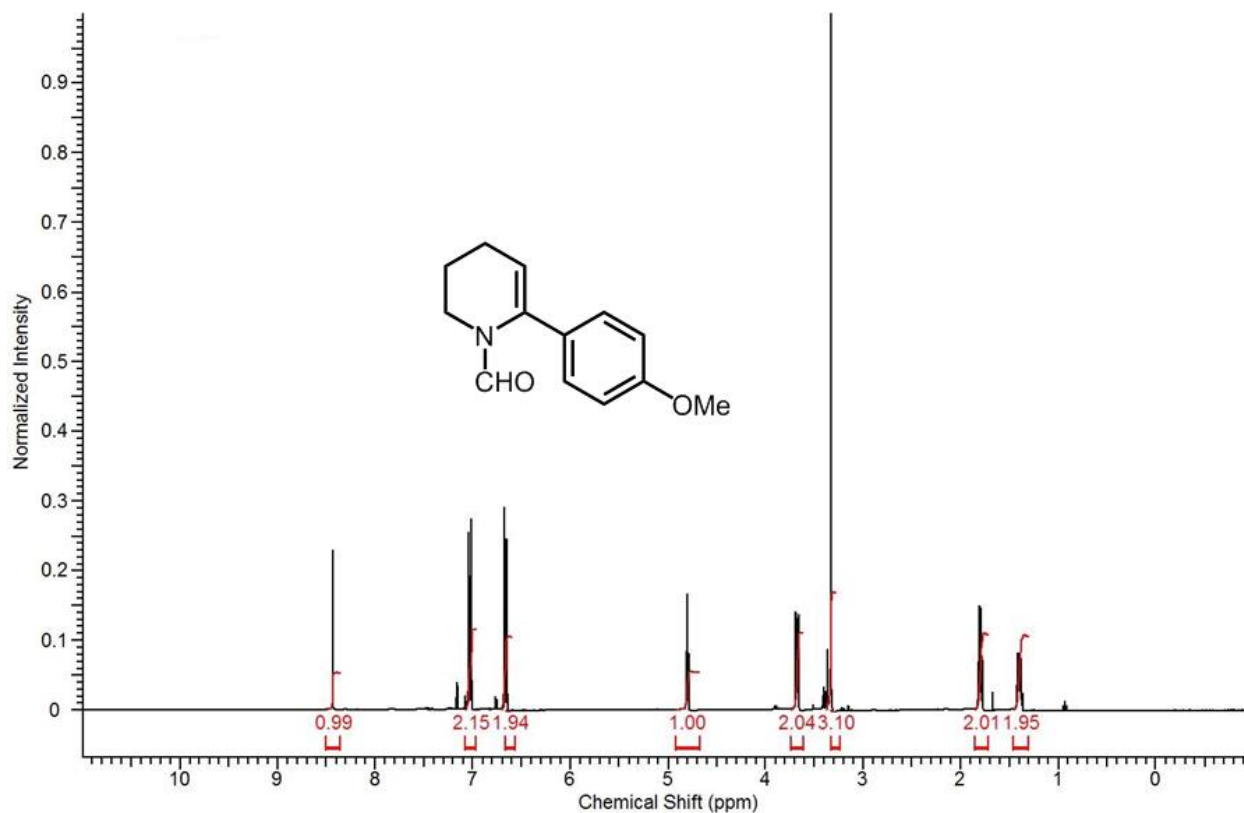

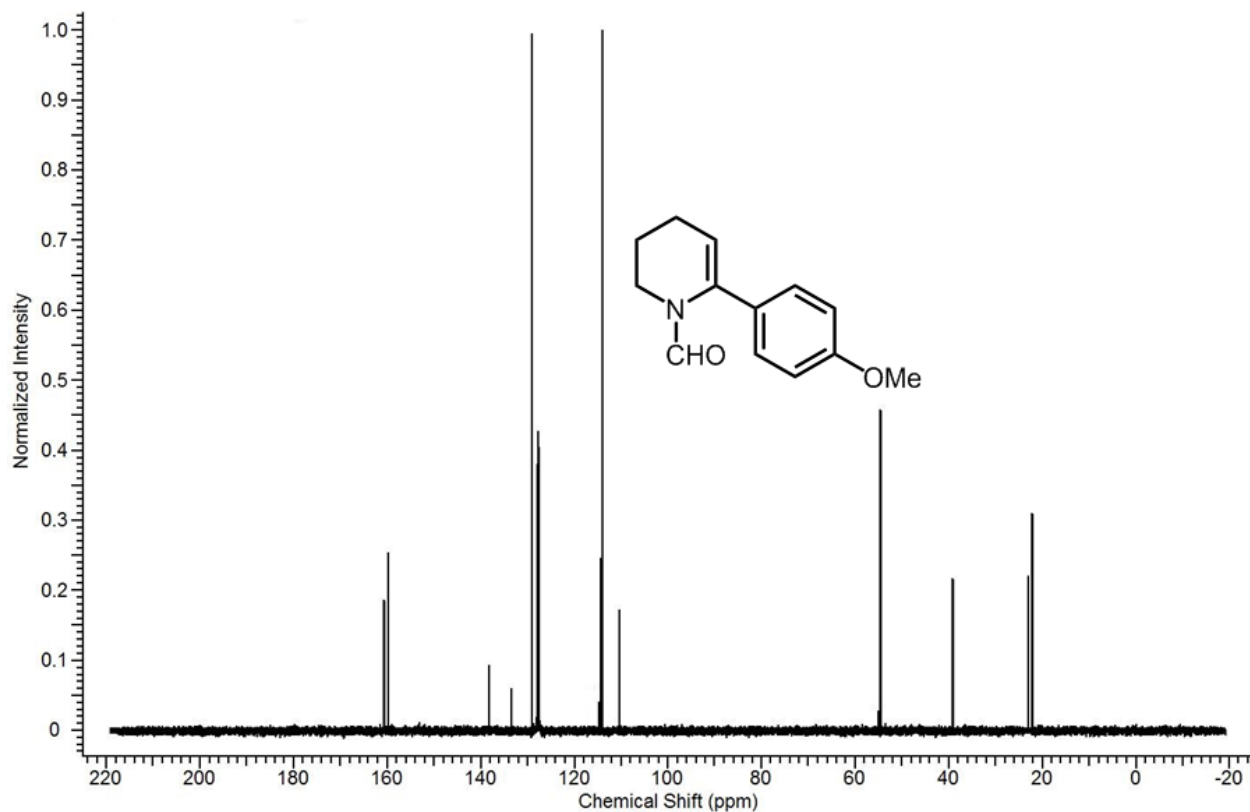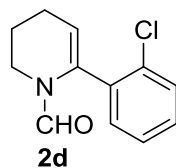

Prepared from **1a** (111 mg, 1 mmol) and *o*-chlorophenyl boronic acid (235 mg, 1.5 equiv) using **General Procedure A** at 80 °C for 30 h. Purification: Flash chromatography on silica (pretreated with 1% Et<sub>3</sub>N) eluting with hexane/EtOAc (20:80). Yield = 115 mg, 52%. <sup>1</sup>H NMR (400 MHz, C<sub>6</sub>D<sub>6</sub>, mixture of rotamers) δ 8.09 (1H), 7.30 to 7.28 (1H), 6.70 to 6.54 (3H), 4.40 to 4.38 (1H), 3.71 to 3.68 (2H), 1.60 to 1.56 (2H), 1.34 to 1.25 (2H). <sup>13</sup>C NMR (101 MHz, C<sub>6</sub>D<sub>6</sub>) δ 160.0, 134.6, 132.9, 132.0, 131.4, 129.7, 124.7, 111.7, 39.9, 23.3, 21.6. HRMS calc for C<sub>12</sub>H<sub>12</sub>ClNO 221.0607, found 221.0610.

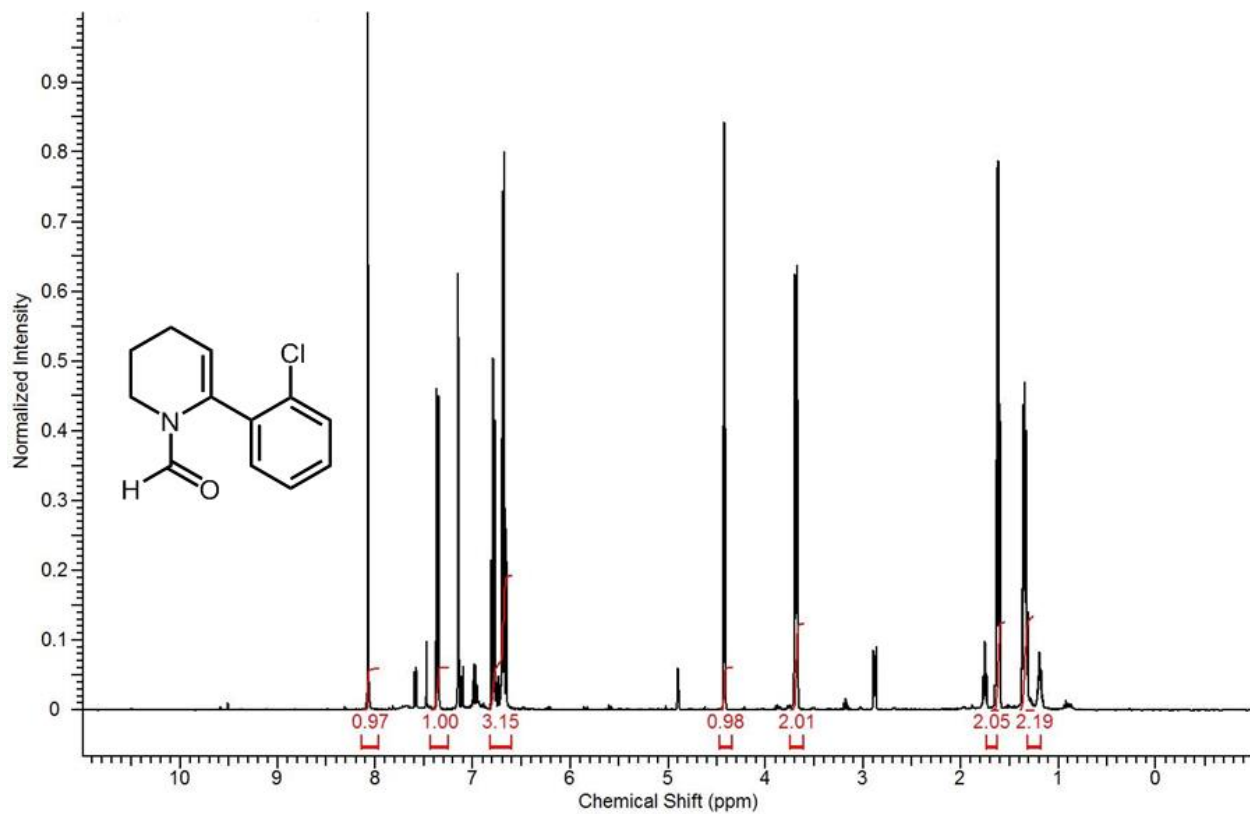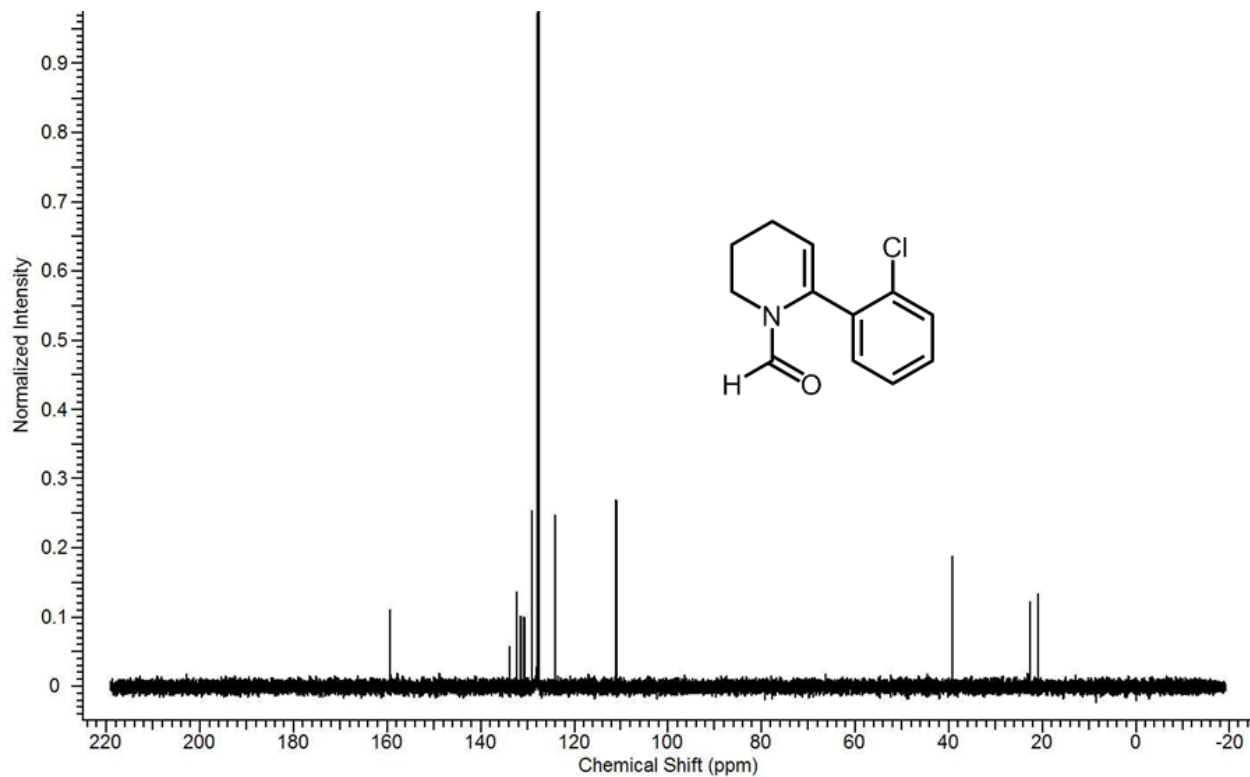



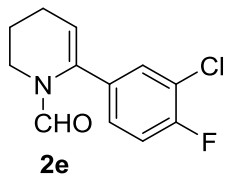

Prepared from **1a** (111 mg, 1.0 mmol) and 3-chloro-4-fluorophenylboronic acid (1.5 equiv) using **General Procedure A** at 80 °C for 36 h. Purification: Flash chromatography on silica (pretreated with 1% Et<sub>3</sub>N) eluting with hexane/EtOAc (90:10). Yield = 136 mg, 57%. <sup>1</sup>H NMR (400 MHz, C<sub>6</sub>D<sub>6</sub>) δ 8.04 (1H), 6.97 to 6.95 (1H), 6.47 to 6.45 (2H), 4.48 to 4.46 (1H), 3.53 to 3.50 (2H), 1.64 to 1.60 (2H), 1.28 to 1.25 (2H). <sup>13</sup>C NMR (101 MHz, C<sub>6</sub>D<sub>6</sub>) δ 160.3, 136.1, 134.3, 129.9, 127.4, 127.3, 116.6, 116.4, 112.6, 39.0, 22.8, 21.7. HRMS calc for C<sub>12</sub>H<sub>11</sub>ClFNO 239.0513, found 239.0511. Data as previously reported by us.<sup>1</sup>

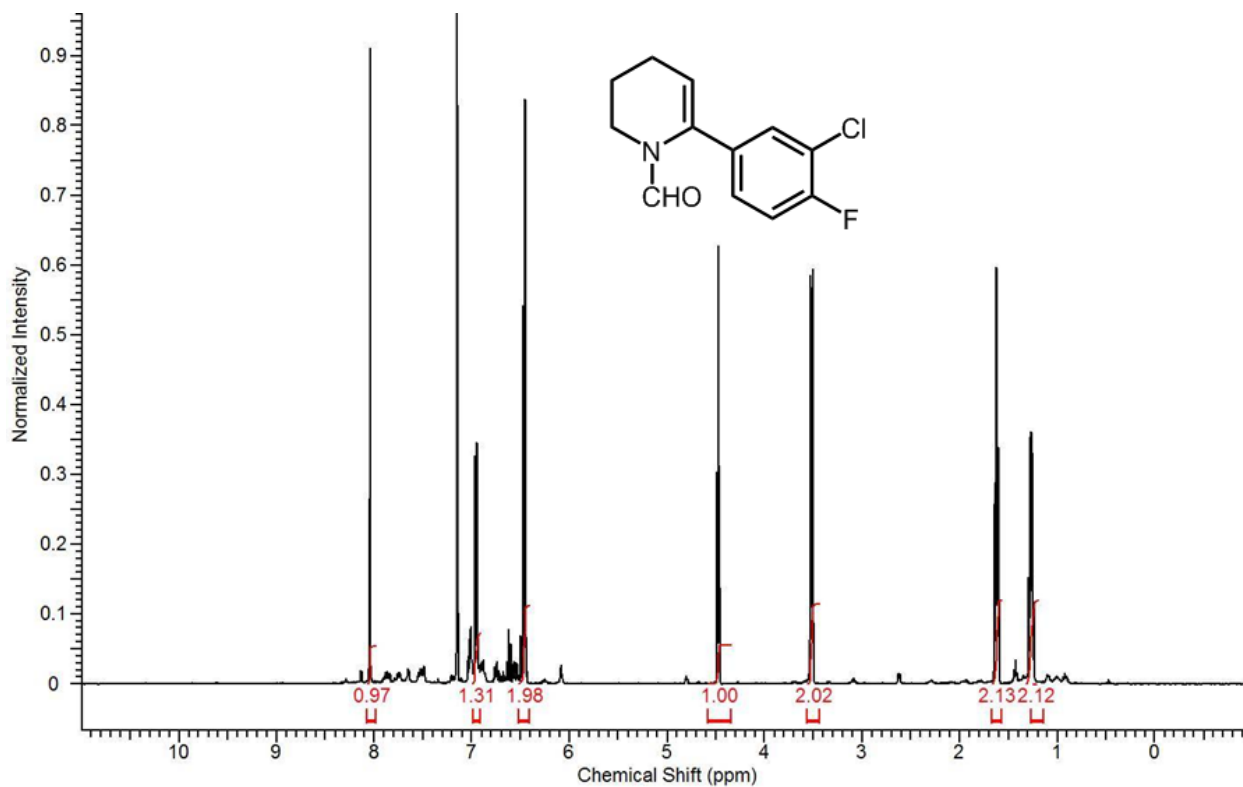

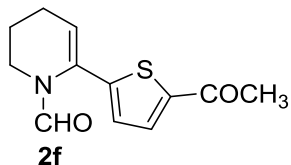

Prepared from **1a** (111 mg, 1.0 mmol) and 5-acetyl-2-thiopheneboronic acid (1.5 equiv), using **General Procedure A**. Purification: Flash chromatography on silica (pretreated with 1% Et<sub>3</sub>N) eluting with hexane/EtOAc (50:50). Yield = 181 mg, 77%. <sup>1</sup>H NMR (400 MHz, C<sub>6</sub>D<sub>6</sub>) δ 8.49 (1H), 6.83 (1H), 6.46 (1H), 4.99 to 4.97 (1H), 3.51 to 3.48 (2H), 2.02 (3H), 1.56 to 1.52 (2H), 1.20 to 1.14 (2H). <sup>13</sup>C NMR (101 MHz, C<sub>6</sub>D<sub>6</sub>) δ 189.80, 160.91, 147.28, 144.41, 132.88, 132.38, 126.80, 115.79, 39.62, 26.54, 23.74, 22.39. HRMS calc for C<sub>12</sub>H<sub>13</sub>NO<sub>2</sub>S 235.0667, found 235.0662.

### MS Chromatogram

Group#1 Scan(+) ESI : 236

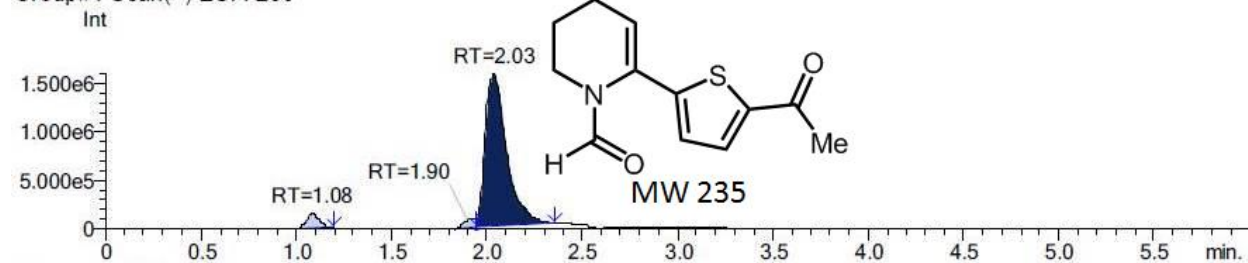

### MS Spectrum

Group#1 - MS Mass(236) Peak: 23, RT: 1.94 to 2.23 min

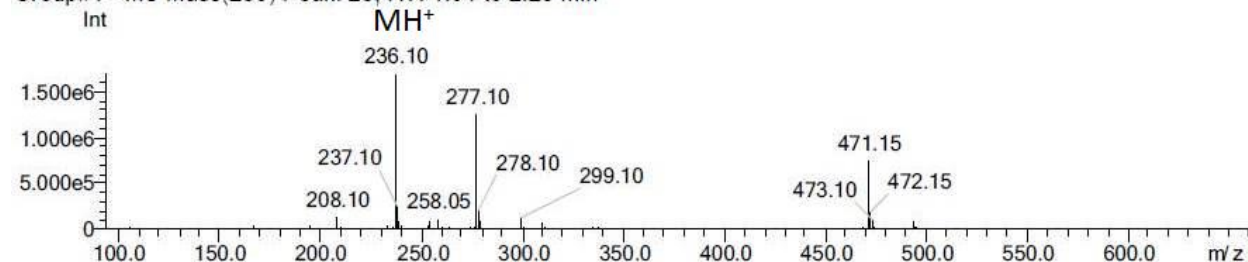

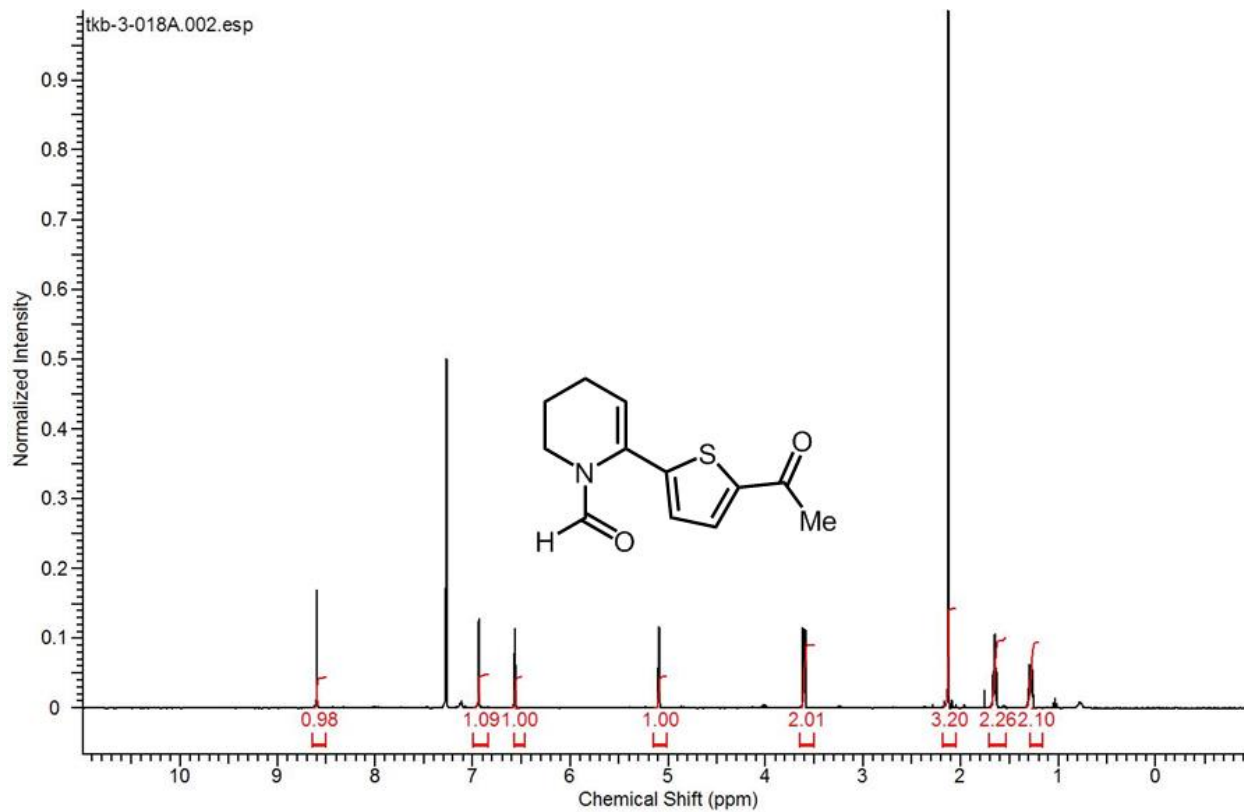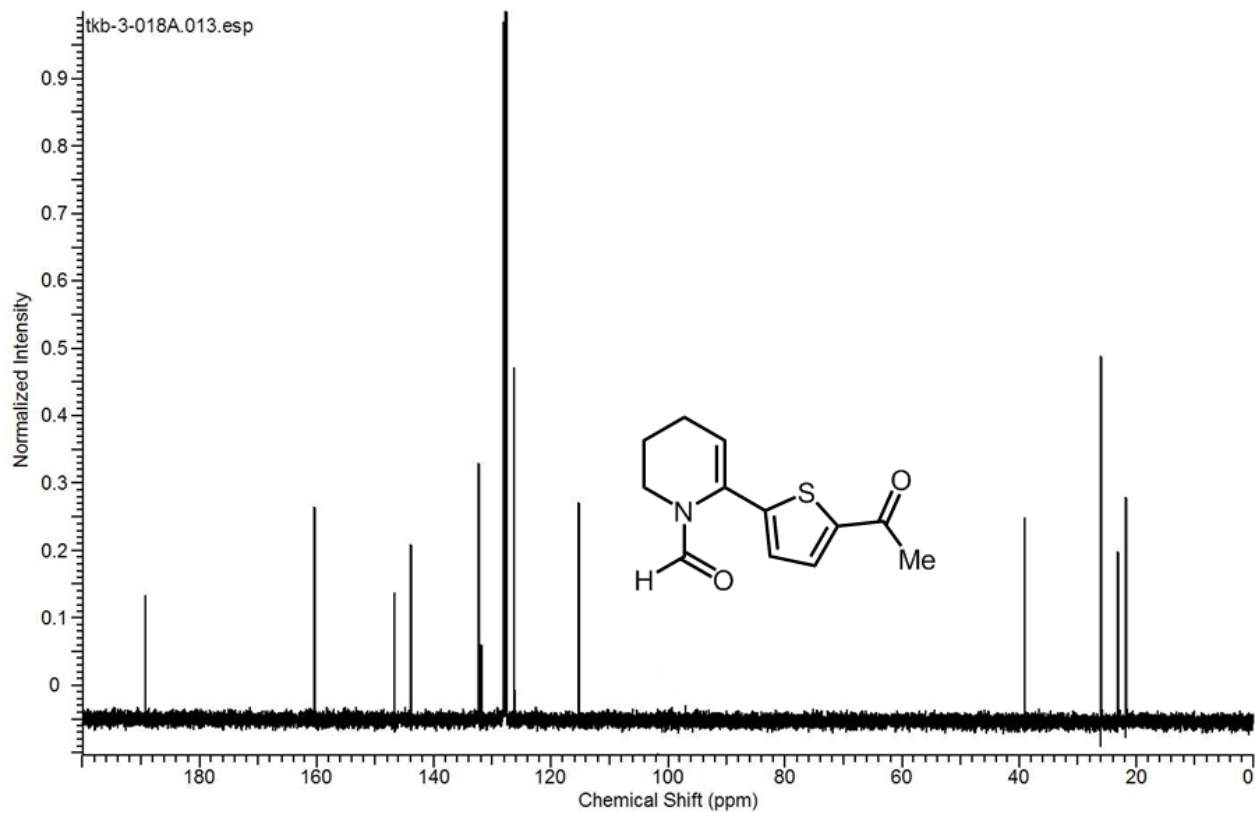

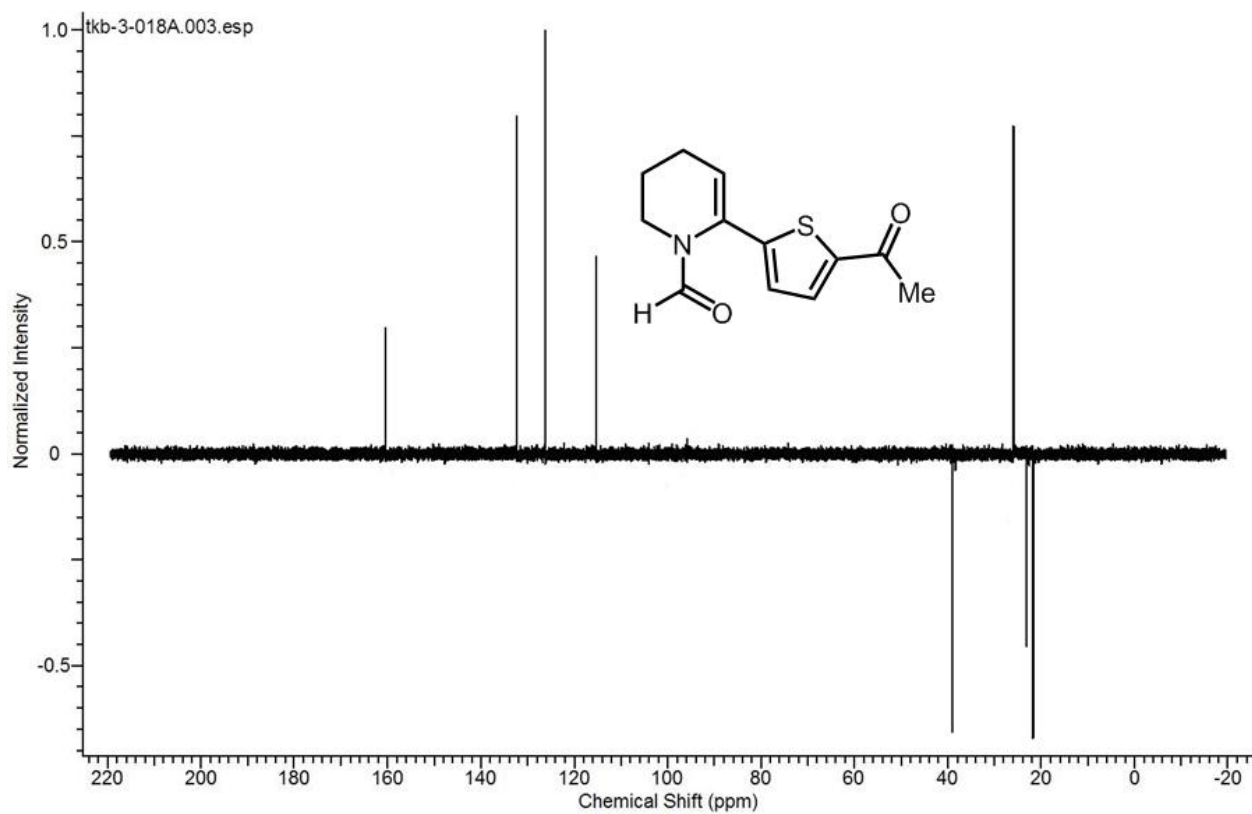

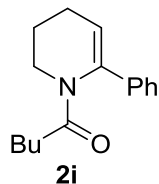

Prepared from **1b** (167 mg, 1.0 mmol) and phenyl boronic acid (1.5 equiv), using General Procedure A. T = 80 °C, time = 18 h; Purification: Flash chromatography on silica (pretreated with 1% Et<sub>3</sub>N) eluting with hexane/EtOAc (70:30). Yield = 136 mg, 56%. <sup>1</sup>H NMR (400 MHz, C<sub>6</sub>D<sub>6</sub>) δ 7.46–6.99 (m, 5H), 5.16 (t, *J* = 4.0 Hz, 1H), 3.76 (br s, 2H), 1.92 (t, *J* = 4.0 Hz, 2H), 1.84–1.80 (m, 2H), 1.59–1.47 (m, 4H), 1.07 (m, *J* = 8.0 Hz, 2H), 0.67 (t, *J* = 8.0 Hz, 3H). <sup>13</sup>C NMR (101 MHz, C<sub>6</sub>D<sub>6</sub>) δ 173.2, 141.5, 140.7, 128.9, 127.8, 125.7, 118.2, 43.4, 36.4, 27.8, 24.3, 23.9, 22.6, 13.9. HRMS-EI<sup>+</sup> (*m/z*): Calcd. for C<sub>16</sub>H<sub>21</sub>NO [M]<sup>+</sup> 243.1623; found, 243.1627.

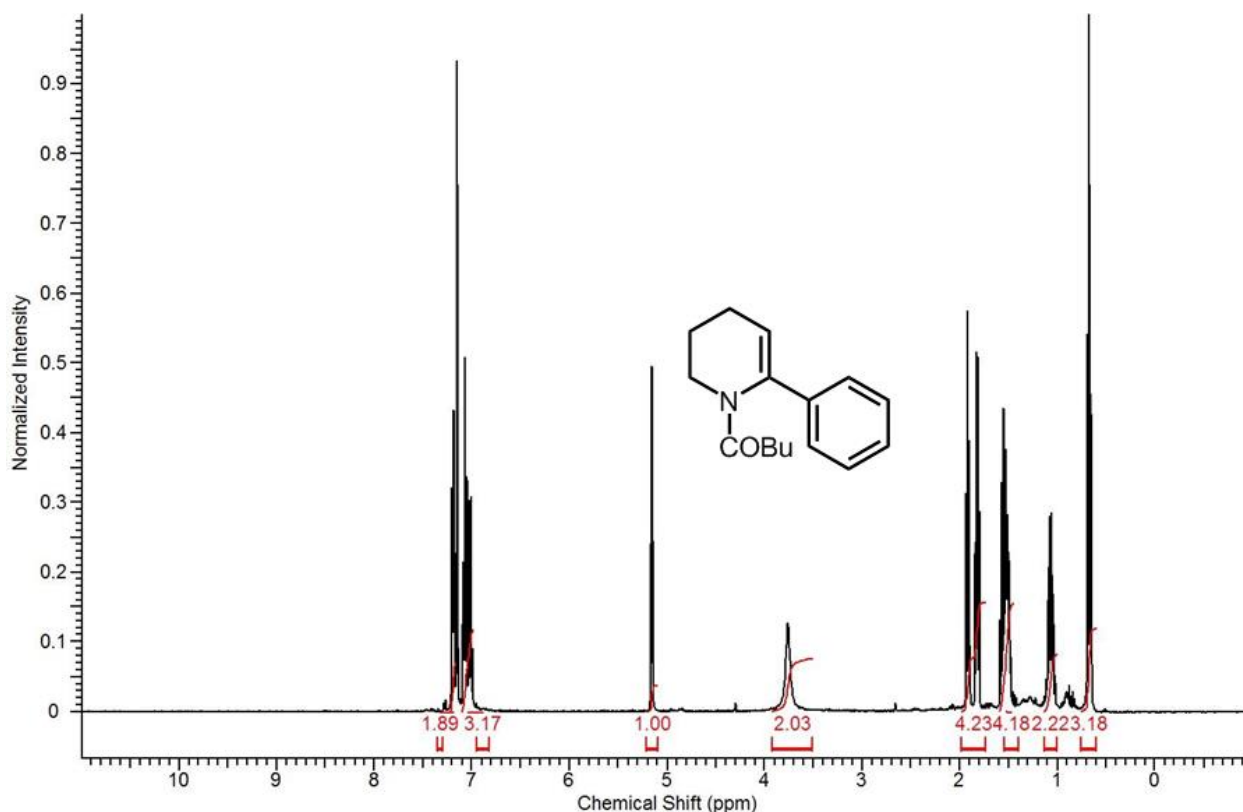

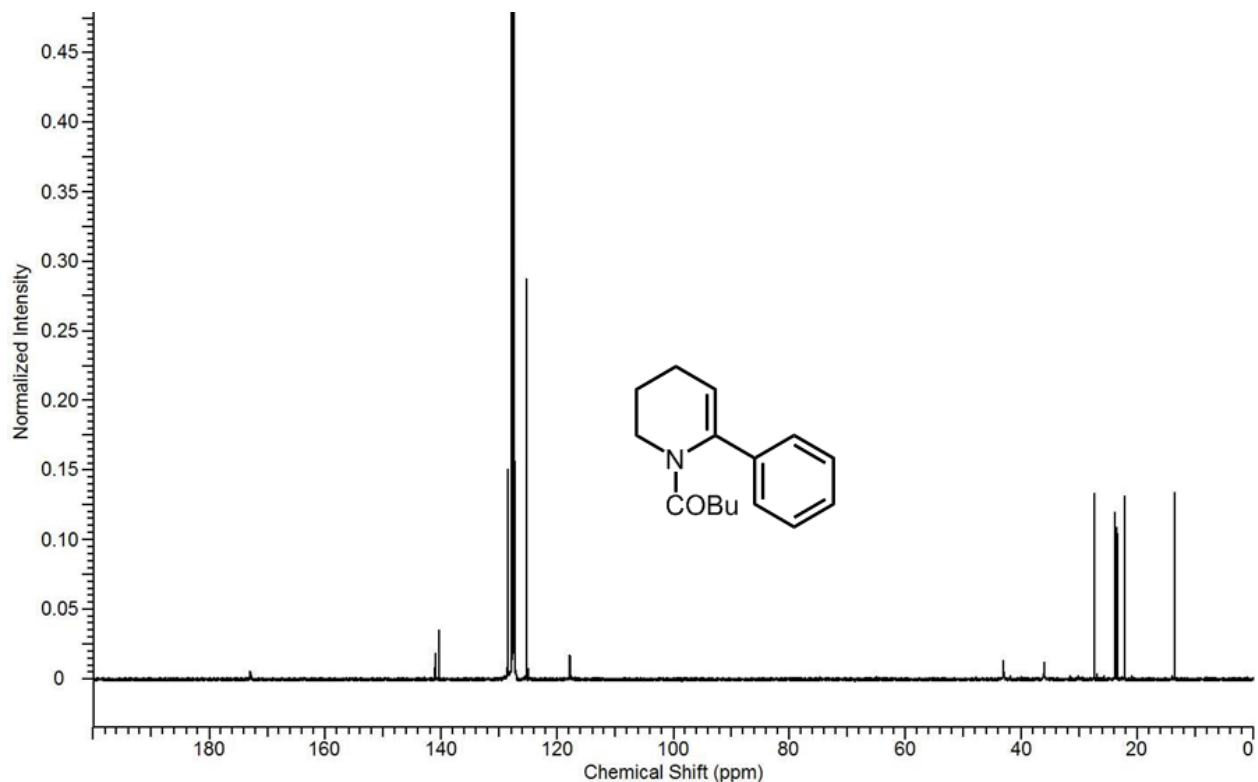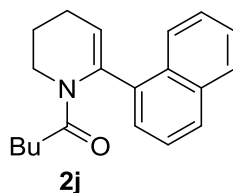

Prepared from **1b** (167 mg, 1.0 mmol) and 1-naphthyl boronic acid (1.5 equiv), using **General Procedure A**. T = 80 °C, time = 18 h; Purification: Flash chromatography on silica (pretreated with 1% Et<sub>3</sub>N) eluting with hexane/EtOAc (90:10). Yield = 144 mg, 49%. **<sup>1</sup>H NMR** (400 MHz, CDCl<sub>3</sub>) δ 8.02–8.00 (m, 1H), 7.86–7.83 (m, 1H), 7.79–7.77 (m, 1H), 7.48–7.43 (m, 4H), 5.51 (m, 1H), 4.01 (s, 2H), 2.41–2.37 (m, 2H), 2.01–1.95 (m, 2H), 1.69 (br s, 2H), 1.19 (br s, 2H), 0.87 (br s, 2H), 0.56 (br s, 3H). **<sup>13</sup>C NMR** (101 MHz, CDCl<sub>3</sub>) δ 172.7, 138.9, 137.7, 133.9, 130.8, 128.7, 128.3, 126.5, 126.0, 125.8, 125.5, 124.9, 120.6, 43.2, 35.9, 27.3, 24.1, 24.1, 22.2, 13.6. **HRMS-EI<sup>+</sup>** (*m/z*): Calcd. for C<sub>20</sub>H<sub>23</sub>NO [M]<sup>+</sup> 293.1780; found, 293.1785.

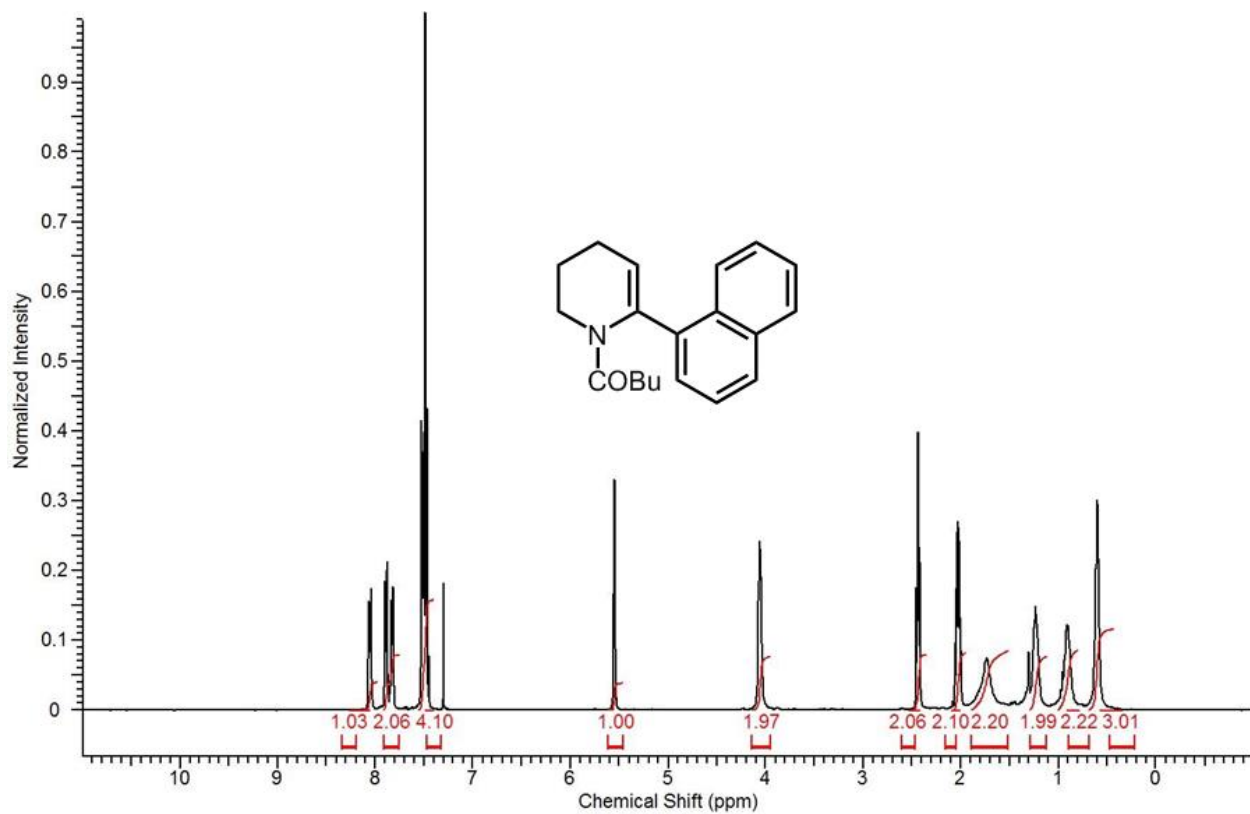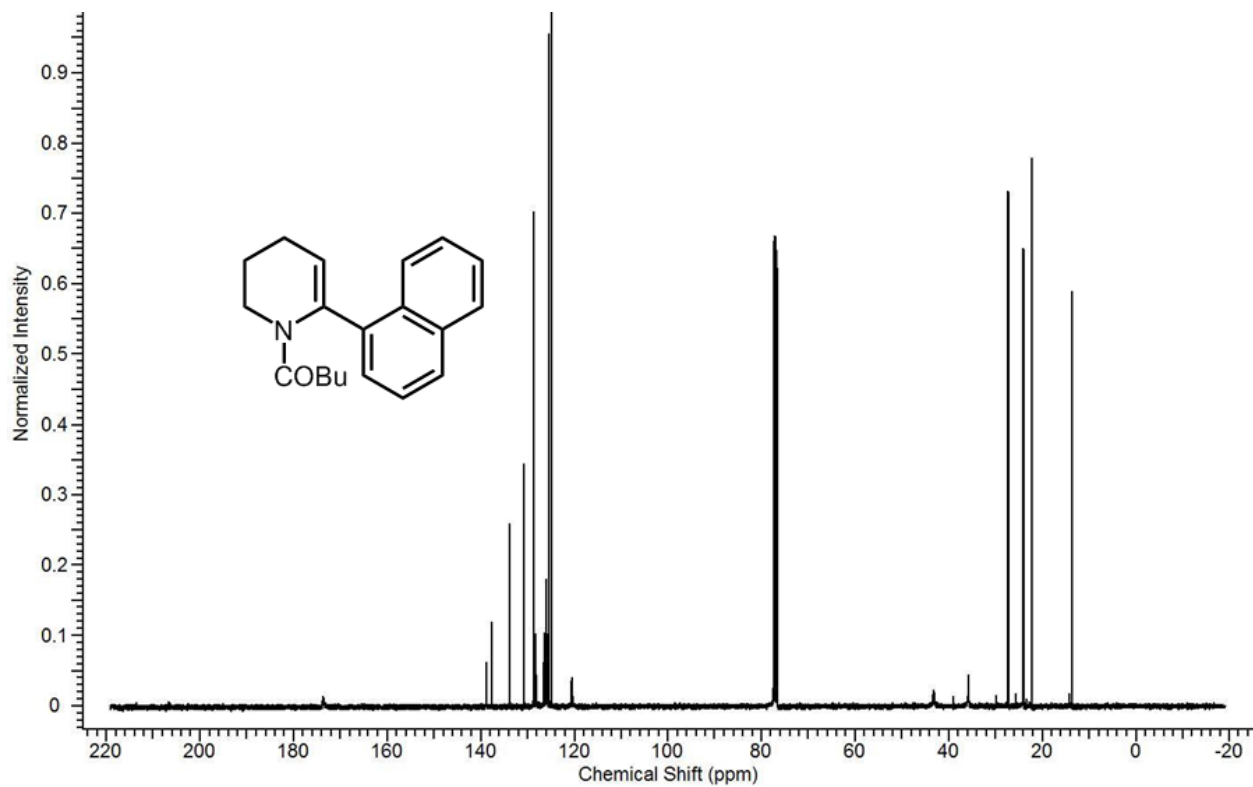

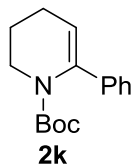

Prepared from **1c** (183 mg, 1.0 mmol) and phenyl boronic acid (1.5 equiv) using **General Procedure A1**. Purification: Flash chromatography on silica (pretreated with 1% Et<sub>3</sub>N) eluting with PE/DCM (2:1). Yield = 192 mg; 80%. NMR data in CDCl<sub>3</sub> has been reported.<sup>2</sup>

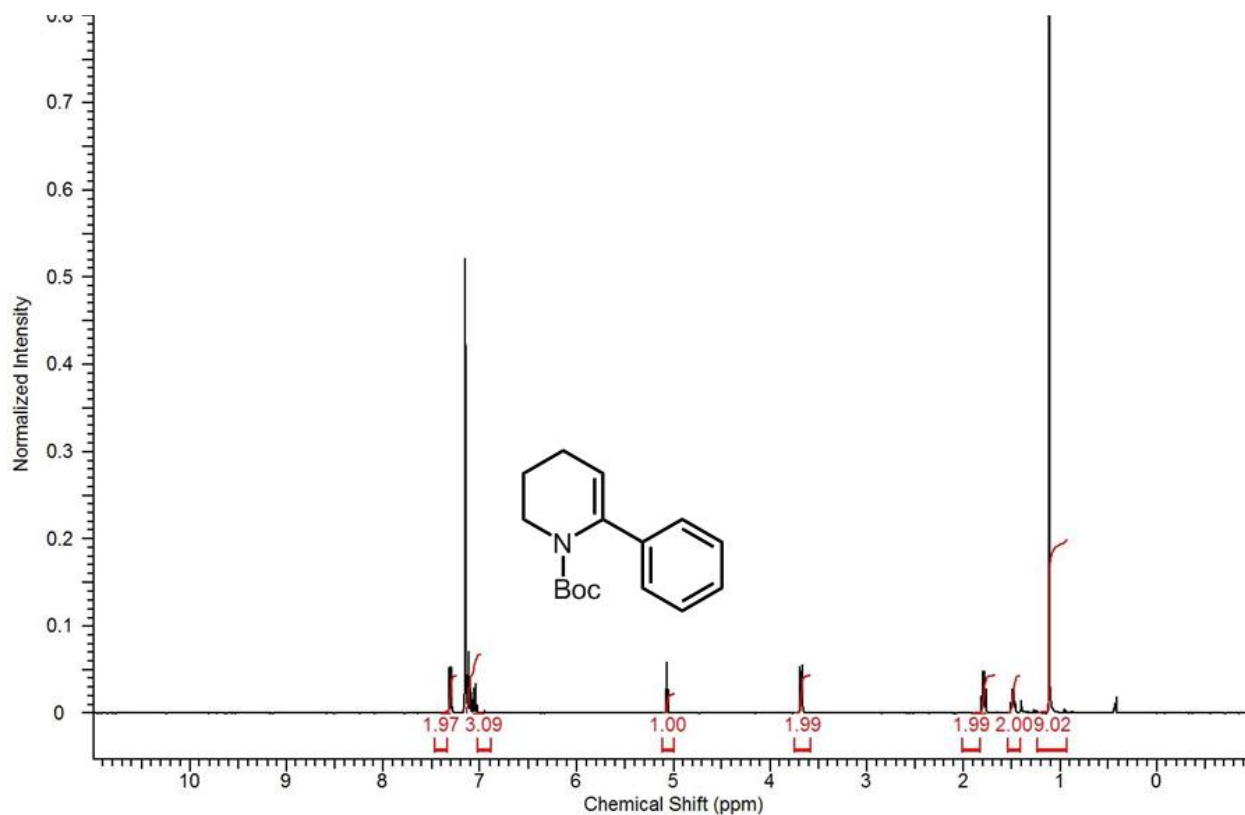



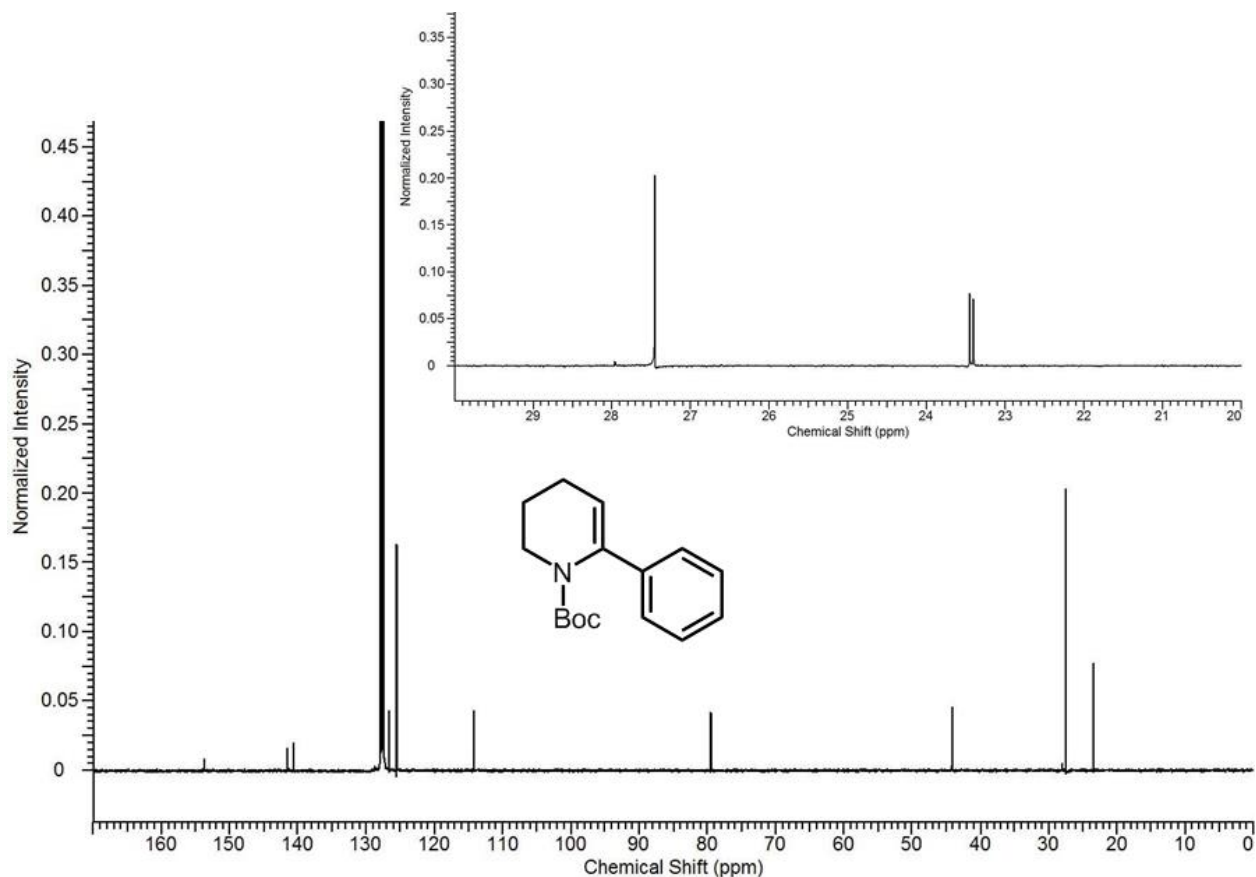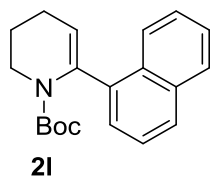

Prepared from **1c** (183 mg, 1 mmol) and 1-naphthylboronic acid (258, 1.5 equiv) using **General Procedure D**. Purification: Flash chromatography on silica (pretreated with 1% Et<sub>3</sub>N) eluting with PE/DCM (2:1). Yield = 229 mg; 74%. <sup>1</sup>H NMR (400 MHz, C<sub>6</sub>D<sub>6</sub>) δ 8.16 (1H, d), 7.81 to 7.85 (6H, m), 5.18 to 5.17 (1H, t), 3.79 to 3.71 (2H, dd), 1.88 to 1.83 (2H, m), 1.55 to 1.52 (2H, m), 0.98 (9H, s). <sup>13</sup>C NMR (101 MHz, C<sub>6</sub>D<sub>6</sub>) δ 153.7, 140.5, 138.9, 133.6, 132.7, 128.5, 128.2, 127.8, 127.5, 127.2, 126.0, 125.3, 124.5, 123.7, 114.9, 79.5, 44.2, 27.3, 23.6, 23.4. HRMS calc for C<sub>20</sub>H<sub>23</sub>NO<sub>2</sub> 309.1729, found 309.1733. Data as previously reported by us.<sup>3</sup>

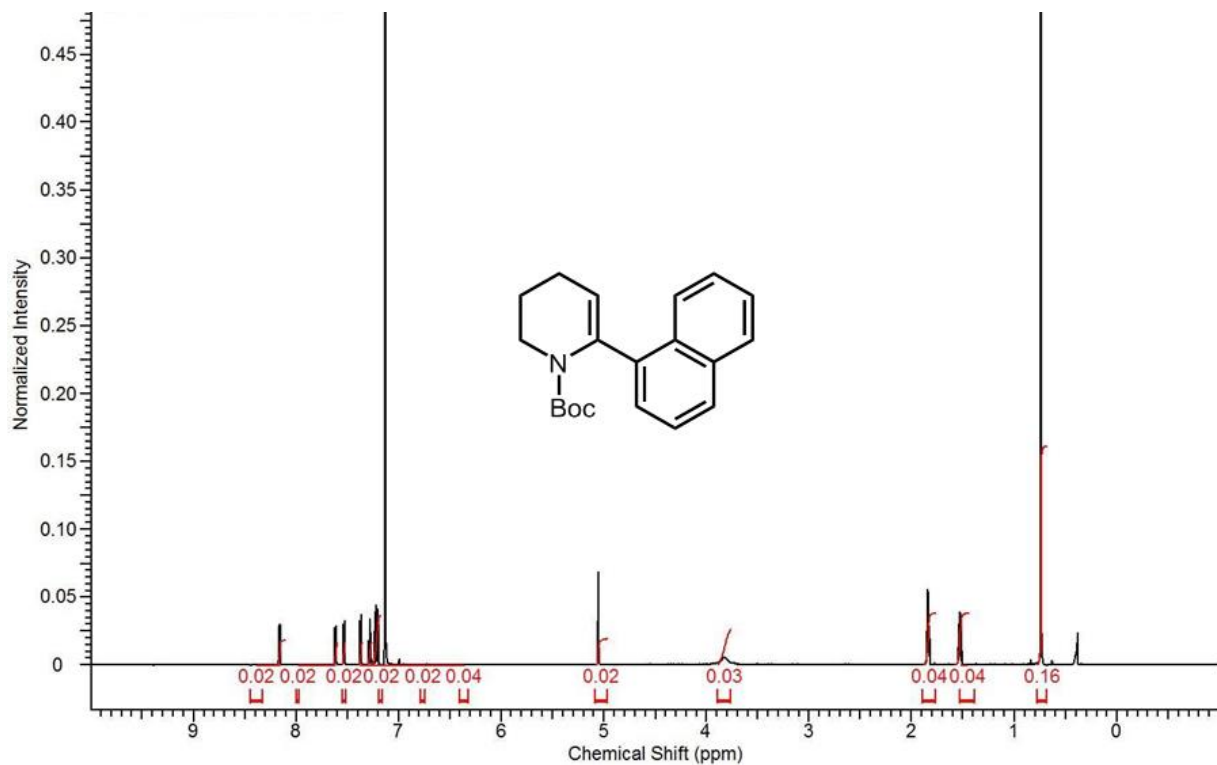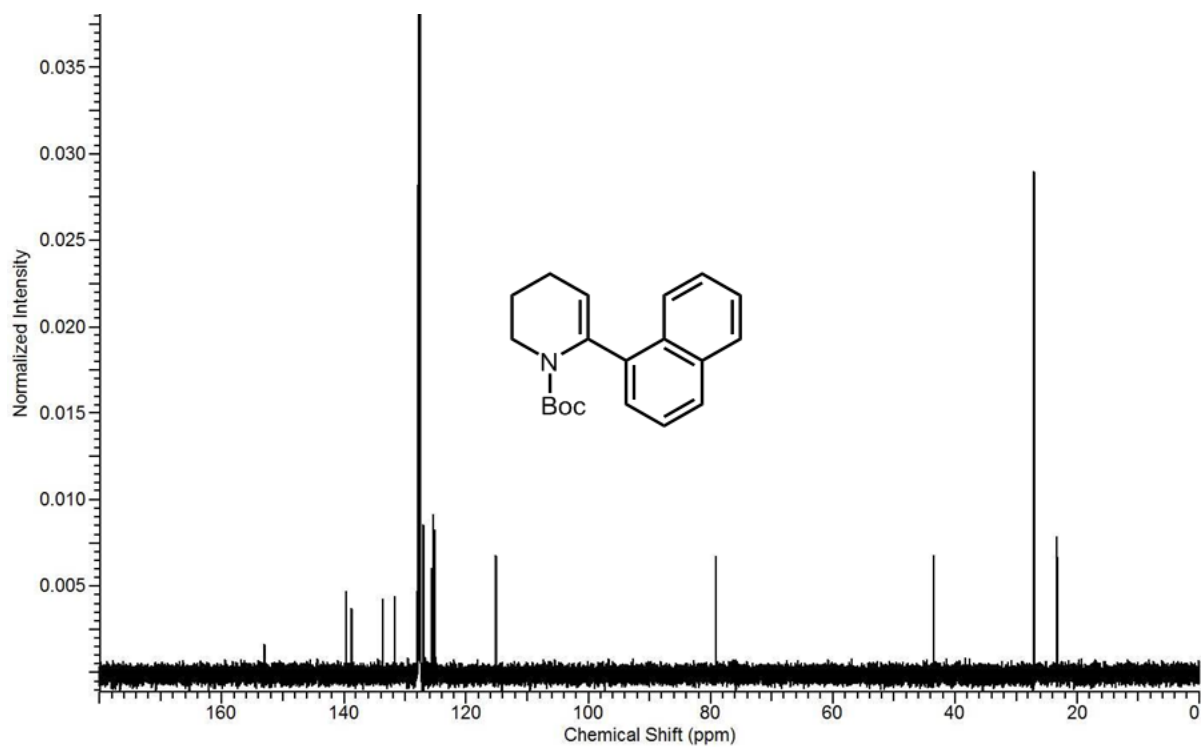

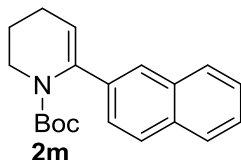

Prepared from **1c** (183 mg, 1.0 mmol) and 2-naphthyl boronic acid (258 mg, 1.5 equiv) using **General Procedure A** but at 80 °C for 18 h. Purification: Flash chromatography on silica (pretreated with 1% Et<sub>3</sub>N) eluting with PE/DCM (2:1). Yield = 241 mg; 78%. <sup>1</sup>H NMR (400 MHz, C<sub>6</sub>D<sub>6</sub>) δ 8.03 (1H), 7.81 to 7.20 (6H), 5.18 to 5.17 (1H), 3.75 to 3.73 (2H), 1.88 to 1.83 (2H), 1.55 to 1.52 (2H), 0.98 (9H). <sup>13</sup>C NMR (101 MHz, C<sub>6</sub>D<sub>6</sub>) δ 153.71, 140.51, 138.91, 133.61, 132.79, 128.52, 128.27, 127.81, 127.56, 127.22, 126.00, 125.37, 124.51, 123.77, 114.90, 79.58, 44.22, 27.37, 23.62, 23.45. HRMS calc for C<sub>20</sub>H<sub>23</sub>NO<sub>2</sub> 309.1729, found 309.1733. Data as previously reported by us.<sup>1</sup>

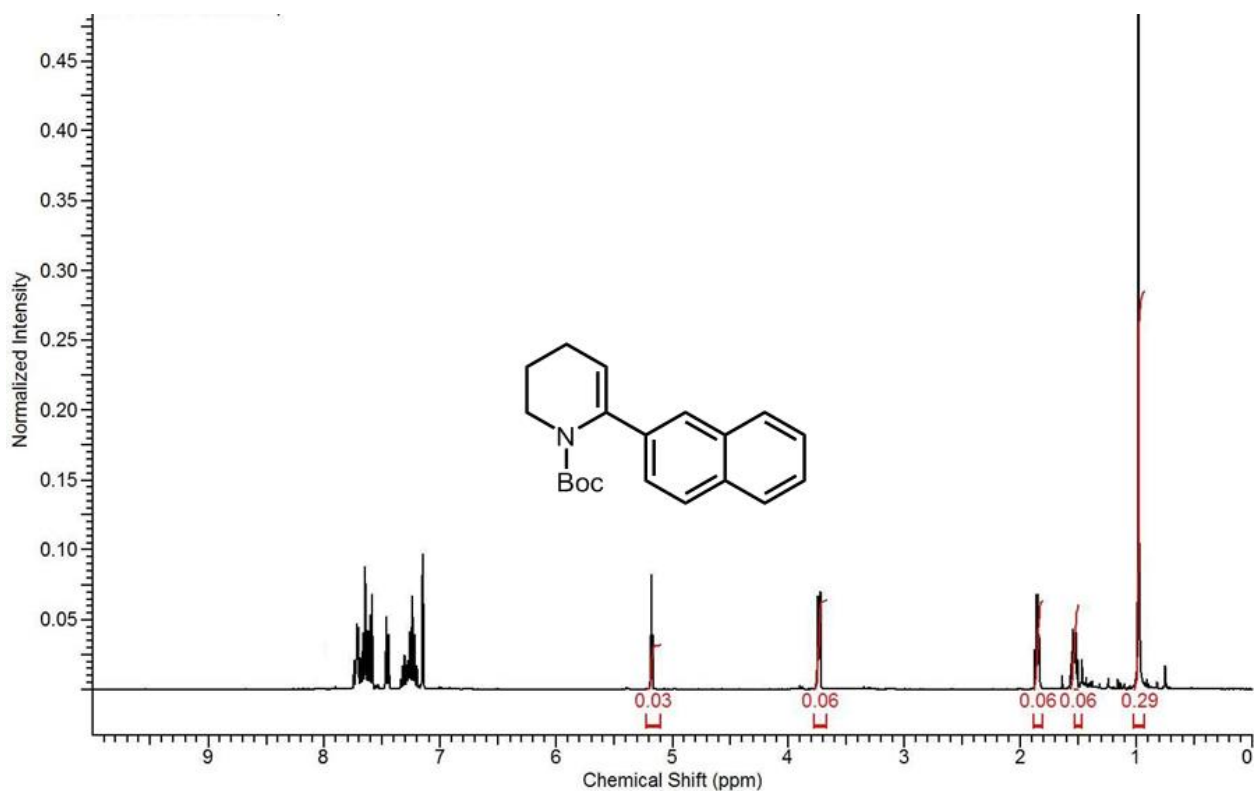

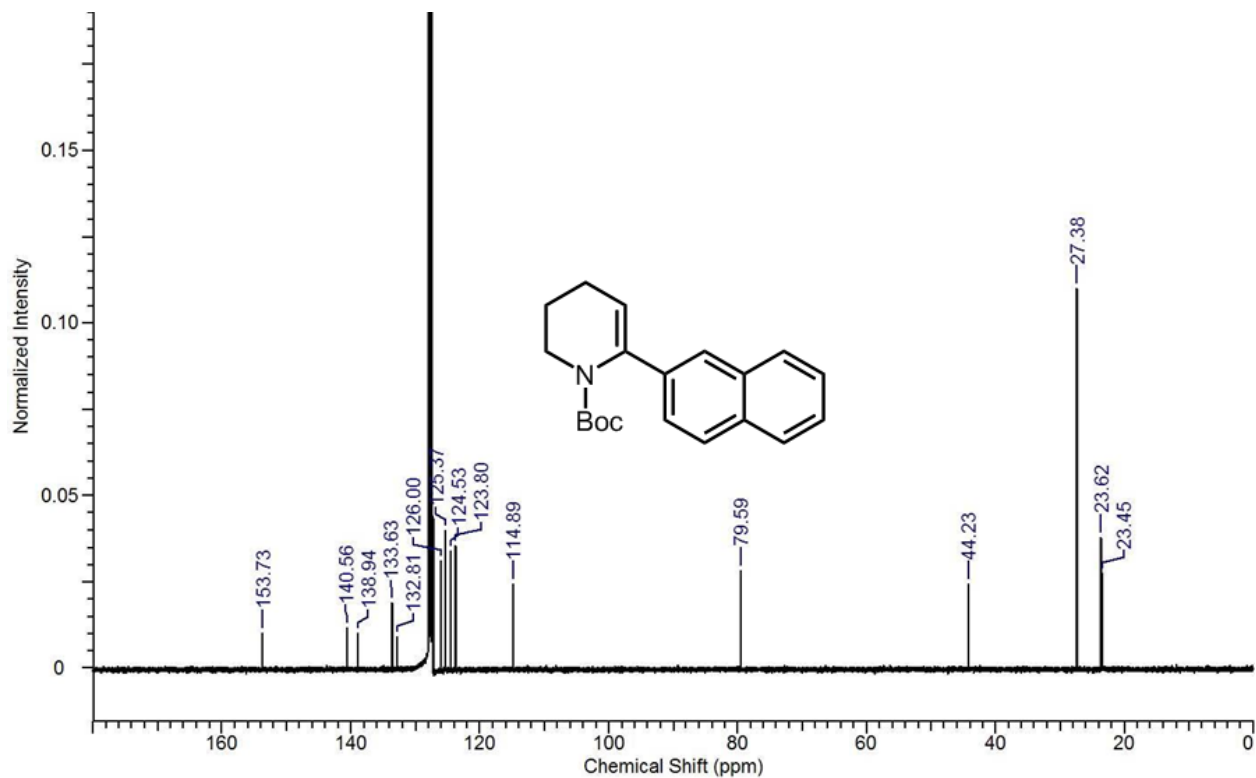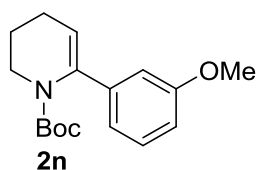

Prepared from **1c** (183 mg, 1.0 mmol) and 3-methoxyphenylmagnesium bromide (3 equiv), using **General Procedure D**. Purification: Flash chromatography on silica (pretreated with 1%  $\text{Et}_3\text{N}$ ) eluting with PE/DCM (1:1). Yield = 249 mg; 86%.  $^1\text{H}$  NMR (400 MHz,  $\text{C}_6\text{D}_6$ )  $\delta$  7.22 (1H, s), 7.18 to 6.96 (2H, m), 6.80 to 6.71 (2H, t), 5.14 to 5.12 (1H, t), 3.68 to 3.66 (2H, dd), 3.34 (3H, s), 1.82 to 1.78 (2H, m), 1.52 to 1.46 (2H, m), 1.14 (9H, s).  $^{13}\text{C}$  NMR (101 MHz,  $\text{C}_6\text{D}_6$ )  $\delta$  160.3, 153.7, 142.9, 140.5, 129.7, 119.6, 112.9, 112.9, 112.4, 79.5, 54.4, 44.2, 27.5, 23.4, 23.4. HRMS calc for  $\text{C}_{17}\text{H}_{23}\text{NO}_3$  289.1678, found 289.1600. Data as previously reported by us.<sup>3</sup>

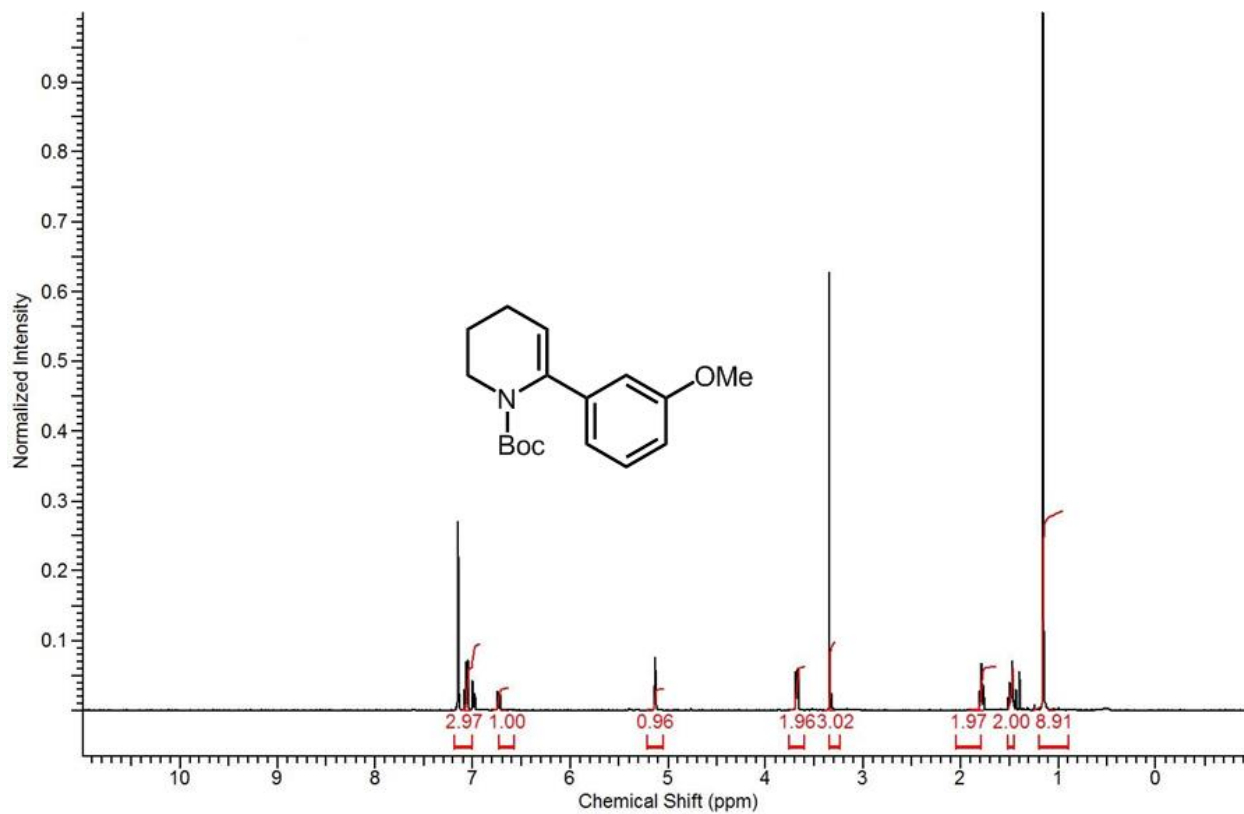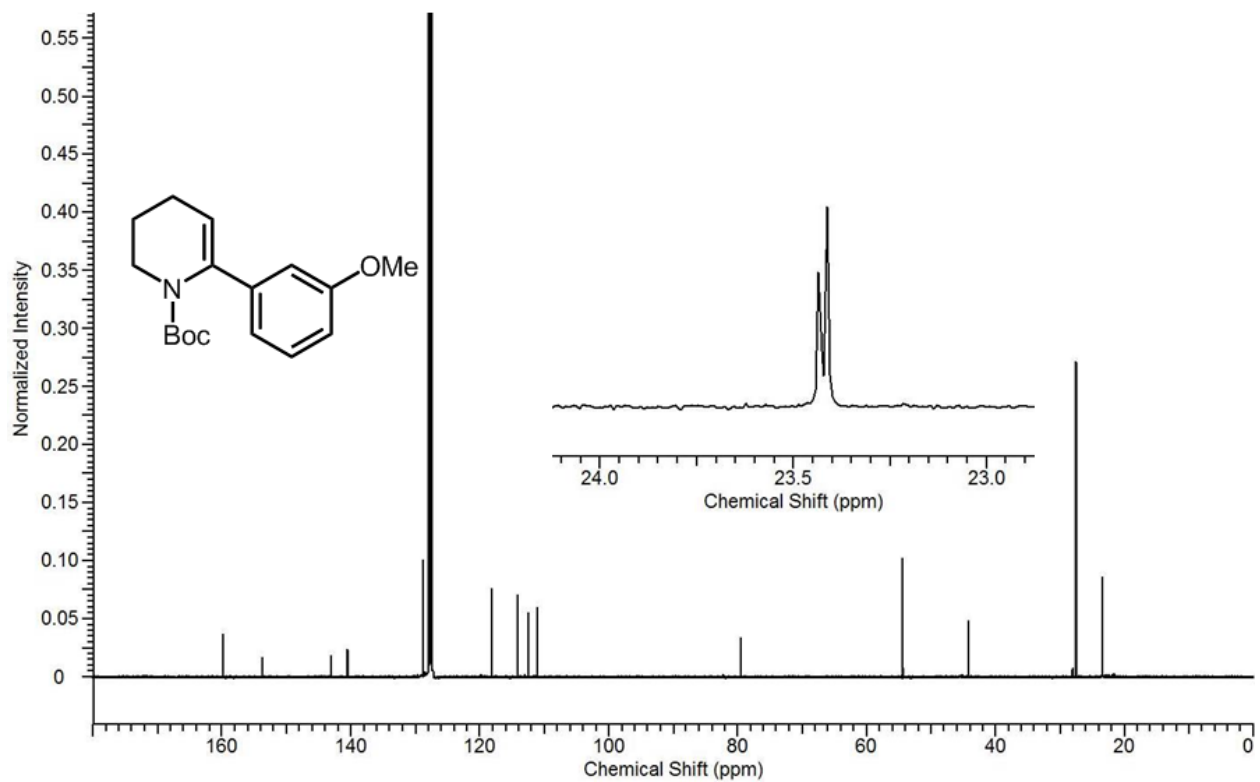

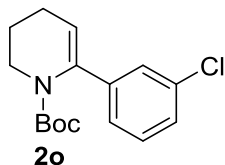

Prepared from **1c** (183 mg, 1.0 mmol) and 3-chlorophenylboronic acid (1.5 equiv) using **General Procedure A**. Temp = 80 °C, time = 22 h. Purification: Flash chromatography on silica (pretreated with 1% Et<sub>3</sub>N) eluting with PE/DCM (1:1). Yield = 205 mg; 70%. <sup>1</sup>H NMR (400 MHz, C<sub>6</sub>D<sub>6</sub>) δ 7.22 (1H, s), 7.18 to 6.96 (2H, m), 6.80 to 6.71 (1H, t), 5.14 to 5.12 (1H, t), 3.68 to 3.66 (2H, dd), 1.82 to 1.78 (2H, m), 1.52 to 1.46 (2H, m), 1.14 (9H, s). <sup>13</sup>C NMR (101 MHz, C<sub>6</sub>D<sub>6</sub>) δ 153.3, 143.3, 139.2, 133.8, 129.0, 126.5, 125.8, 123.5, 115.2, 79.8, 44.0, 27.4, 23.4, 23.1. HRMS calc for C<sub>16</sub>H<sub>20</sub>ClNO<sub>2</sub> 293.1183, found 293.1178. Data as previously reported by us.<sup>3</sup>

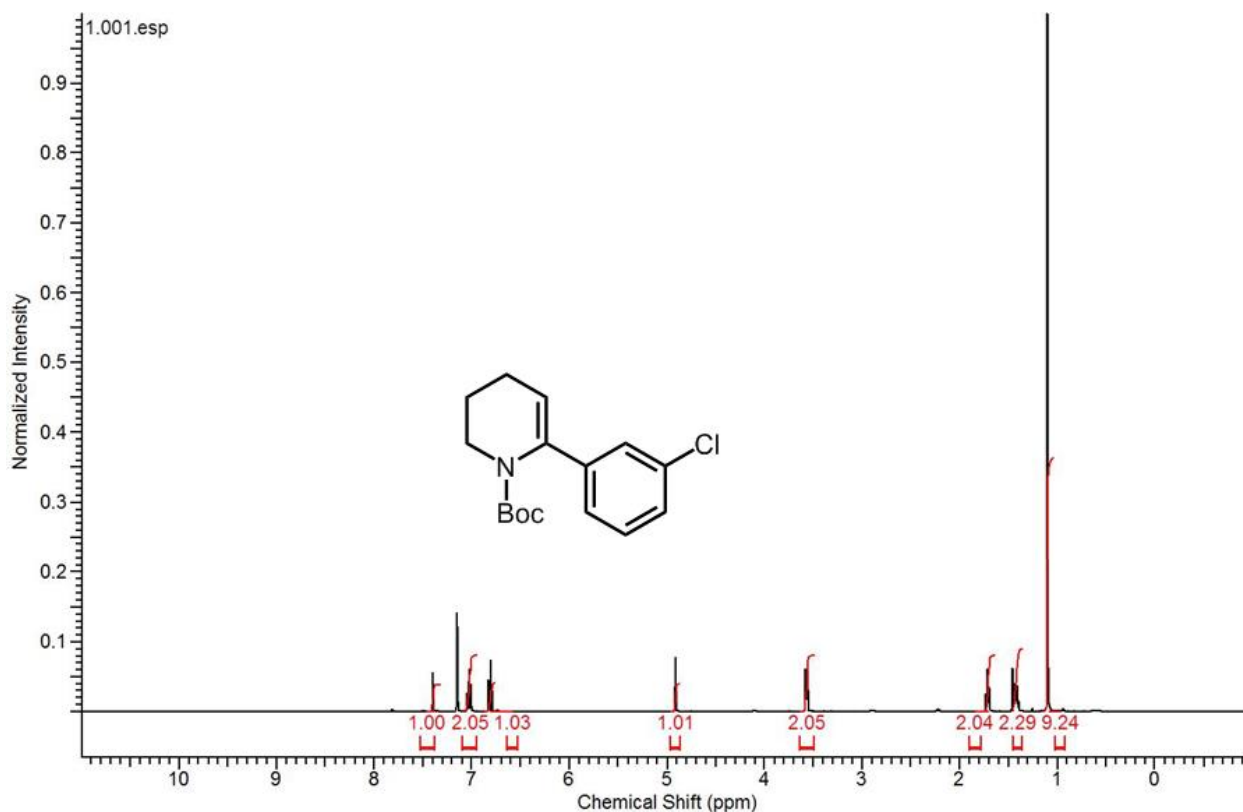

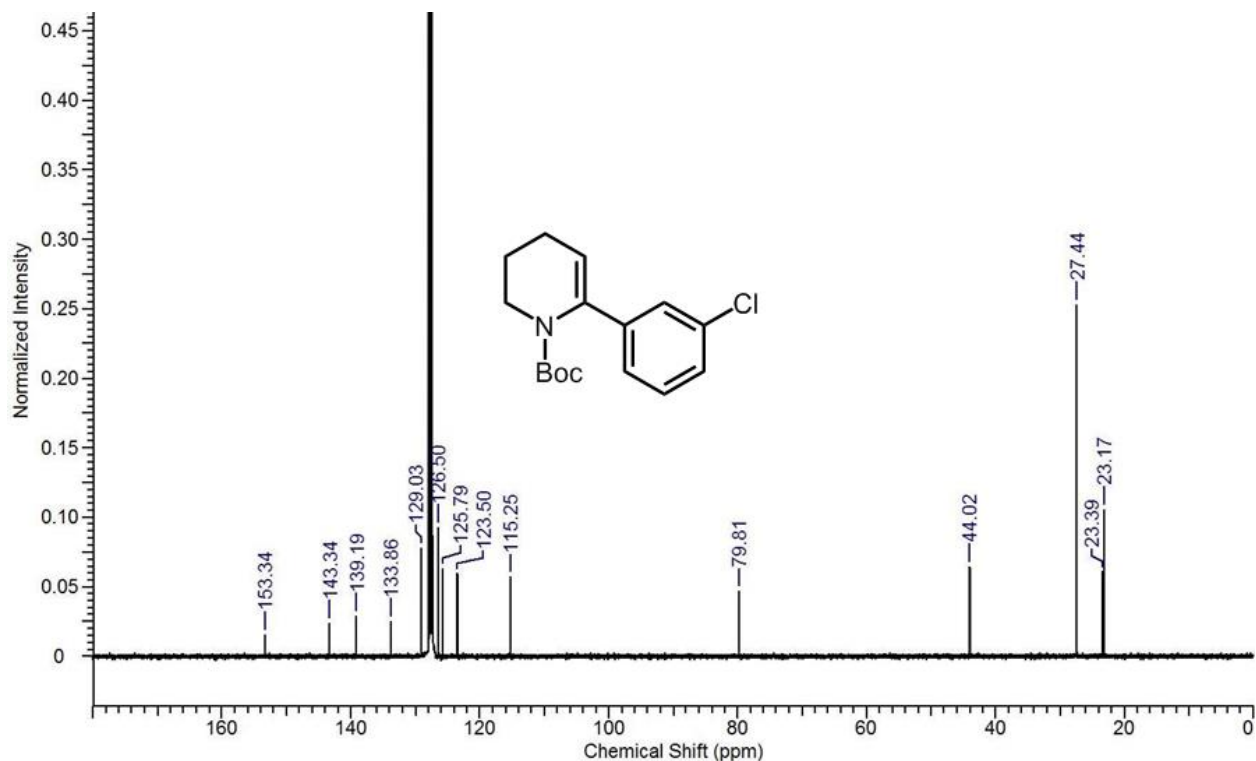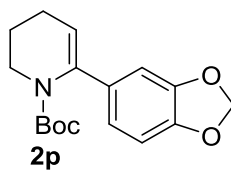

Prepared from **1c** (183 mg, 1 mmol) and 5-benzo[*d*][1,3]dioxolylboronic acid (1.5 equiv) using **General Procedure A**. Purification: Flash chromatography on silica (pretreated with 1% Et<sub>3</sub>N) eluting with PE/DCM (1:3). Yield = 267 mg; 88%. <sup>1</sup>H NMR (400 MHz, C<sub>6</sub>D<sub>6</sub>) δ 6.94 (1H), 6.79 to 6.63 (1H), 5.33 (1H), 5.02 to 5.00 (2H), 3.65 to 3.62 (2H), 1.80 to 1.76 (2H), 1.52 to 1.19 (11H). <sup>13</sup>C NMR (101 MHz, C<sub>6</sub>D<sub>6</sub>) δ 154.4, 148.3, 147.3, 140.9, 136.1, 119.5, 114.0, 109.1, 107.1, 101.3, 80.1, 44.9, 28.3, 24.1, 24.1. HRMS calc for C<sub>17</sub>H<sub>21</sub>NO<sub>4</sub> 303.1471, found 303.1466. Data as previously reported by us.<sup>1</sup>

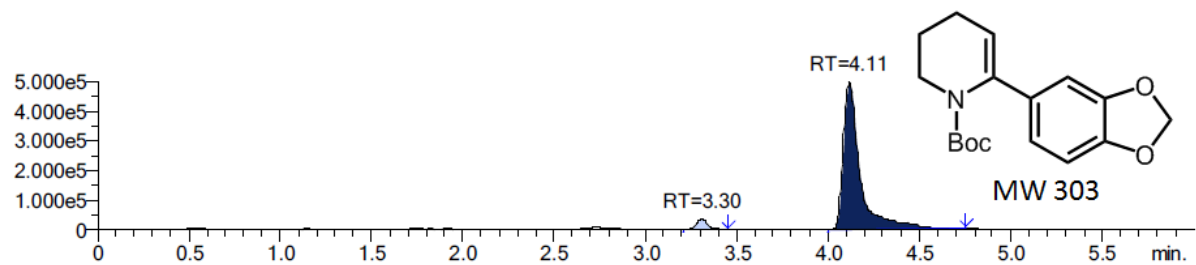

**MS Spectrum**

Group#1 - MS Mass(304) Peak: 22, RT: 4.02 to 4.33 min

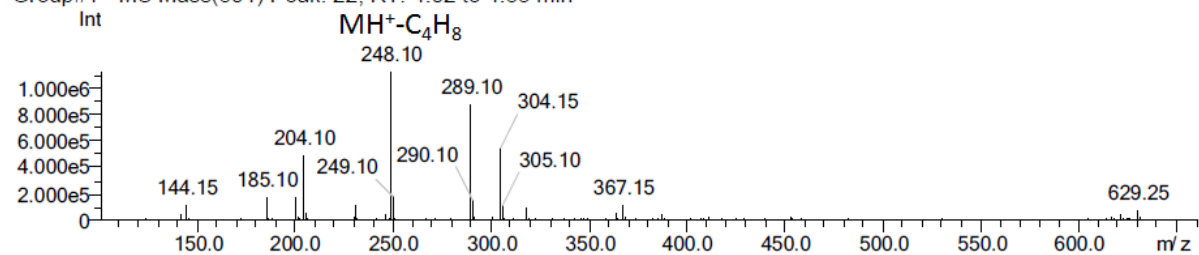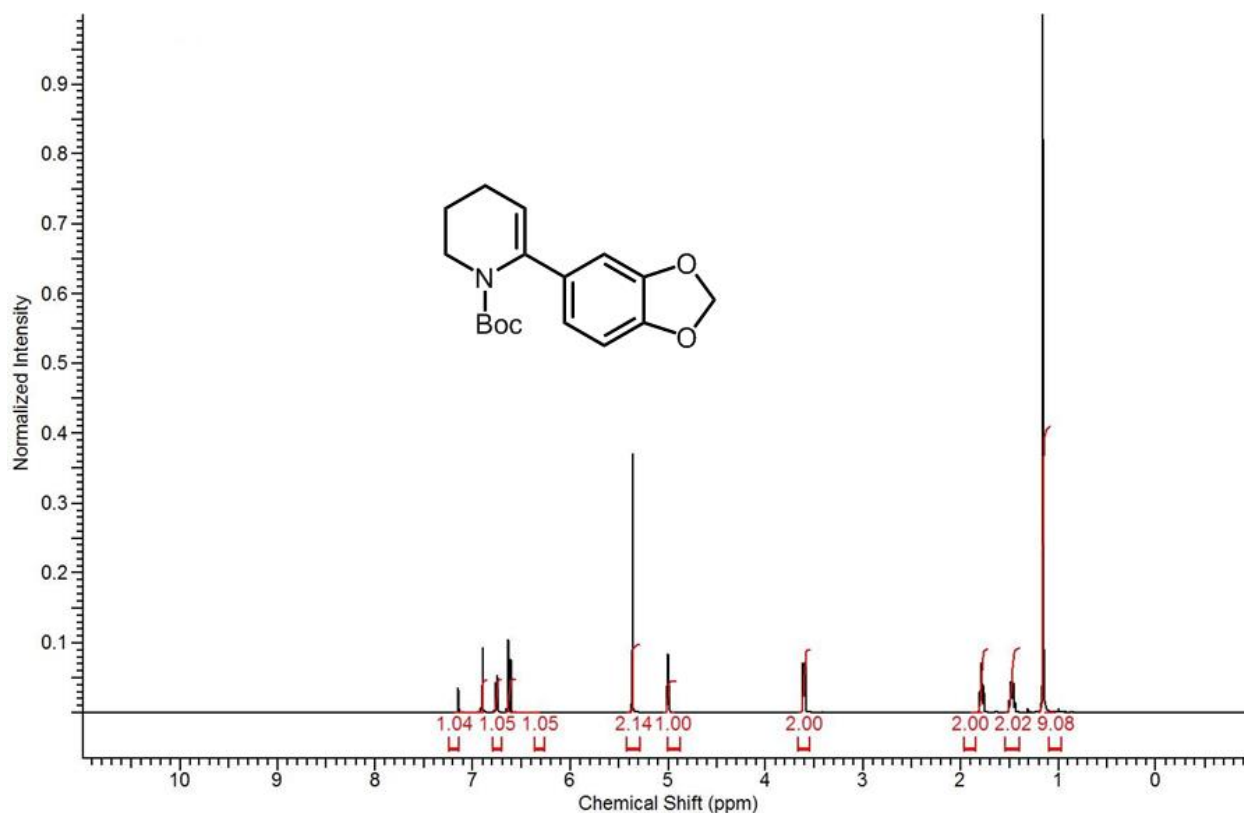



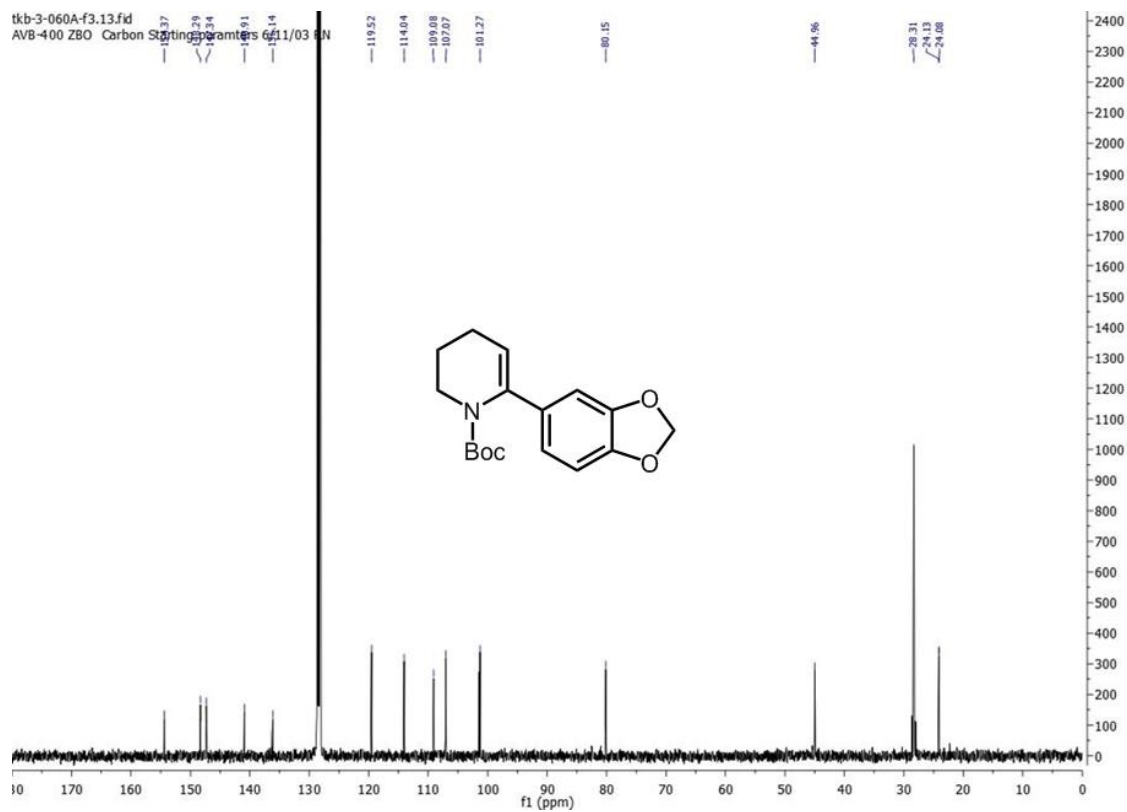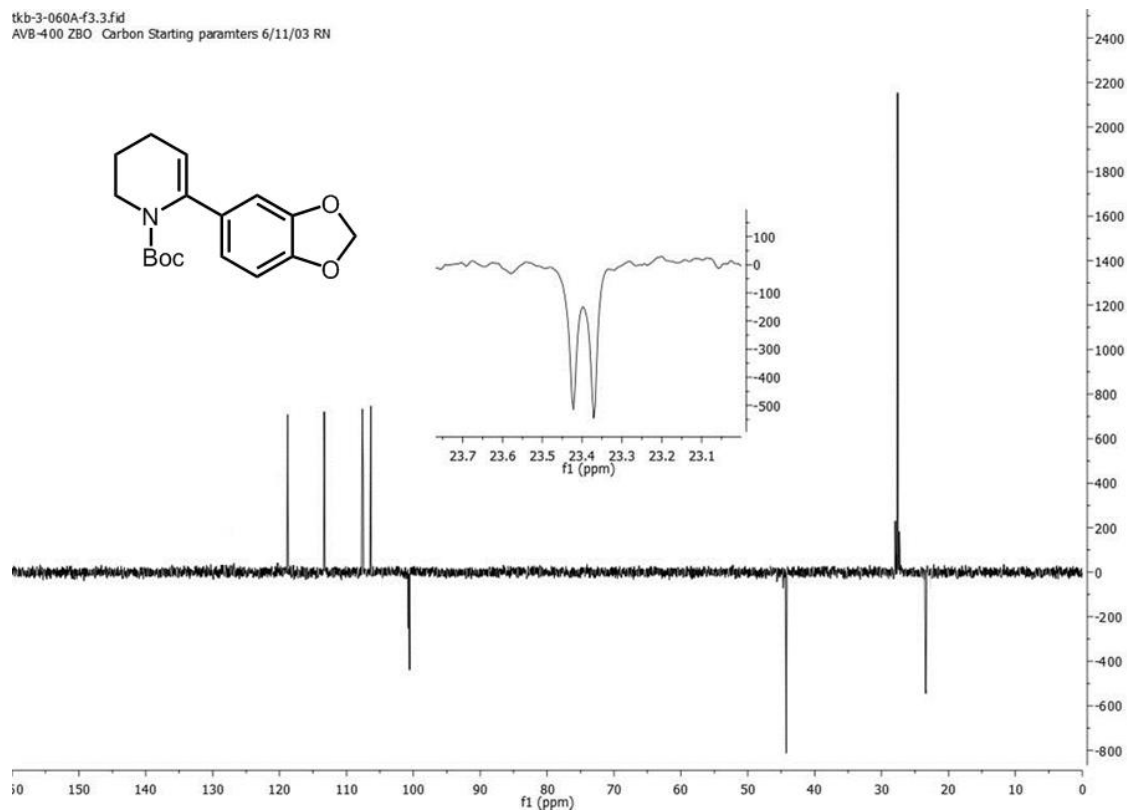

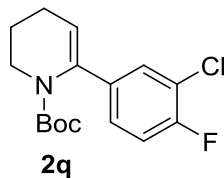

Prepared from **1a** (183 mg, 1.0 mmol) and 3-chloro-4-fluorophenylboronic acid (1.5 equiv) using **General Procedure A** at 80 °C for 36 h. Purification: Flash chromatography on silica (pretreated with 1% Et<sub>3</sub>N) eluting with hexane/EtOAc (90:10). Yield = 215 mg, 69%. <sup>1</sup>H NMR (400 MHz, C<sub>6</sub>D<sub>6</sub>) δ 7.32 to 7.29 (1H), 6.68 to 6.66 (1H), 6.63 (1H), 4.81 to 4.79 (1H, t), 3.55 to 3.53 (2H, dd), 1.73 to 1.69 (2H, dd), 1.46 to 1.39 (2H, m), 1.07 (9H, s). <sup>13</sup>C NMR (101 MHz, C<sub>6</sub>D<sub>6</sub>) δ 158.2, 155.8, 153.2, 138.5, 138.5, 138.3, 124.9, 124.9, 120.4, 120.2, 115.8, 115.5, 115.1, 79.8, 44.0, 27.4, 23.3, 23.1. HRMS calc for C<sub>16</sub>H<sub>19</sub>ClFNO<sub>2</sub> 311.1088, found 311.1084.

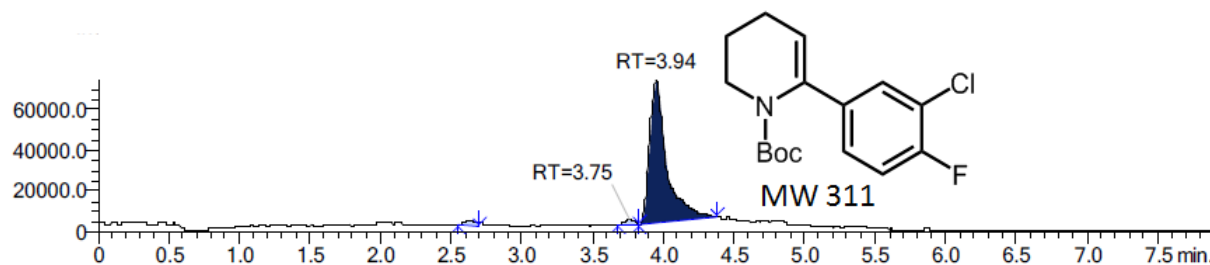**MS Spectrum**

Group#1 - MS Mass(256) Peak: 29, RT: 3.83 to 4.17 min

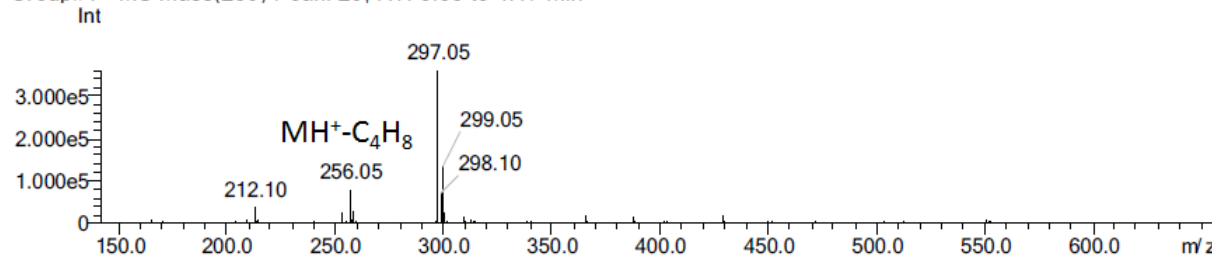

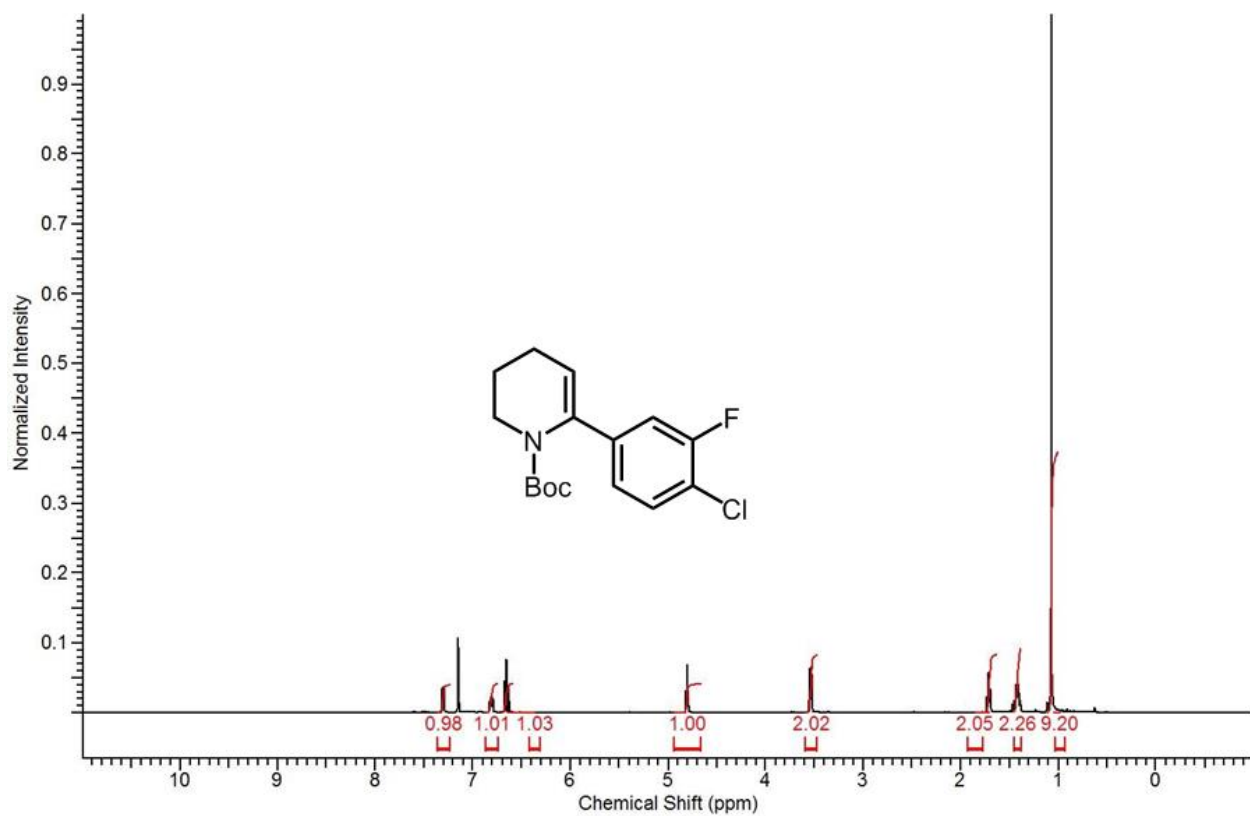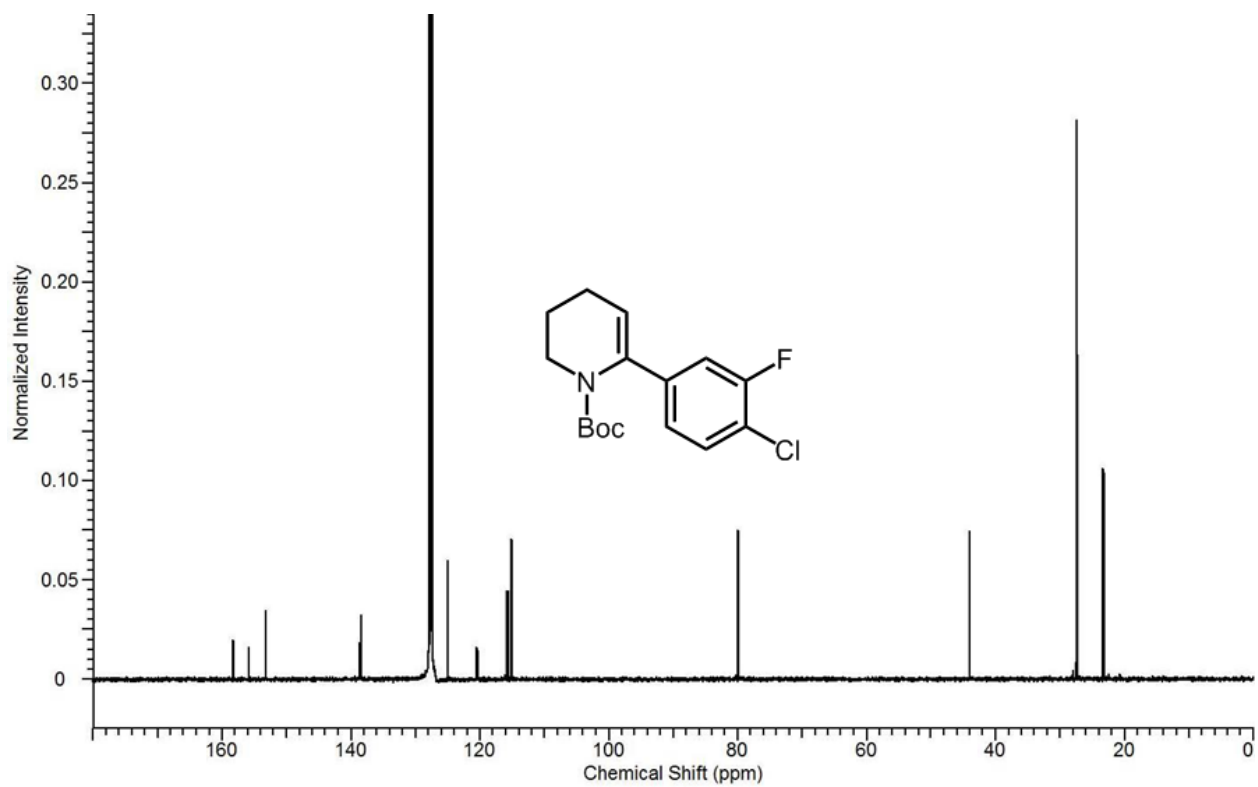

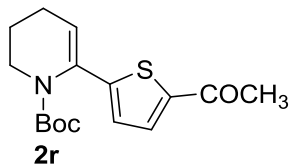

Prepared from **1c** (183 mg, 1.0 mmol) and 5-acetyl-2-thiopheneboronic acid using **General Procedure A**. Purification: Flash chromatography on silica (pretreated with 1% Et<sub>3</sub>N) eluting with PE/DCM (1:1). Yield = 273 mg; 89%. <sup>1</sup>H NMR (400 MHz, C<sub>6</sub>D<sub>6</sub>) δ 7.15 (1H), 6.78 (1H), 5.29 (1H), 3.49 (1H), 2.13 (3H), 1.74 to 1.70 (2H), 1.45 to 1.35 (11H). <sup>13</sup>C NMR (101 MHz, C<sub>6</sub>D<sub>6</sub>) δ 189.78, 154.22, 153.33, 142.35, 135.15, 132.65, 123.77, 118.12, 80.94, 44.96, 28.22, 26.51, 24.05, 23.58. HRMS calc for C<sub>16</sub>H<sub>21</sub>NO<sub>3</sub>S 307.1242, found 307.1248.

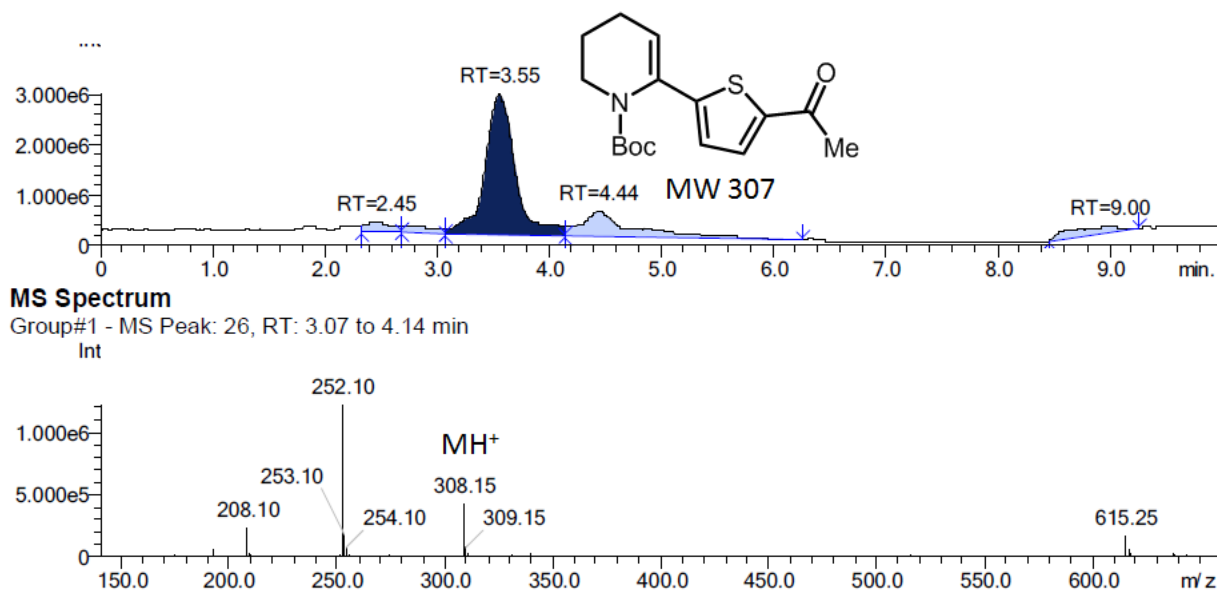

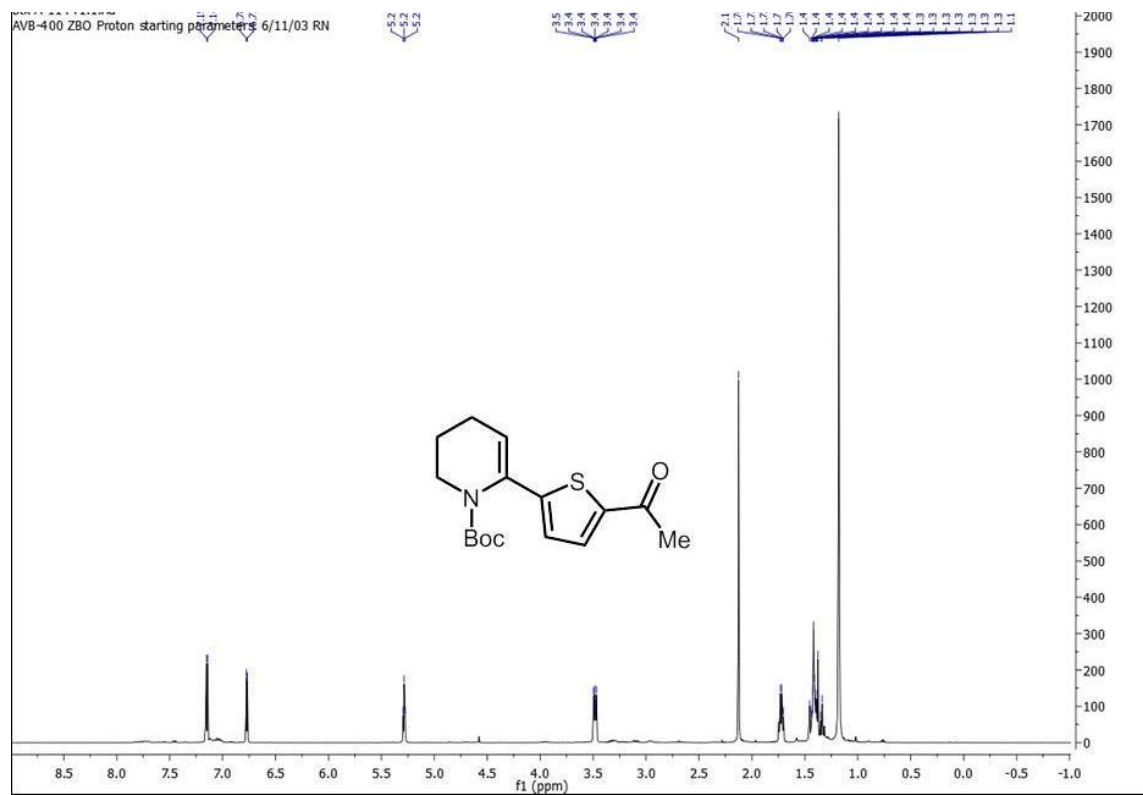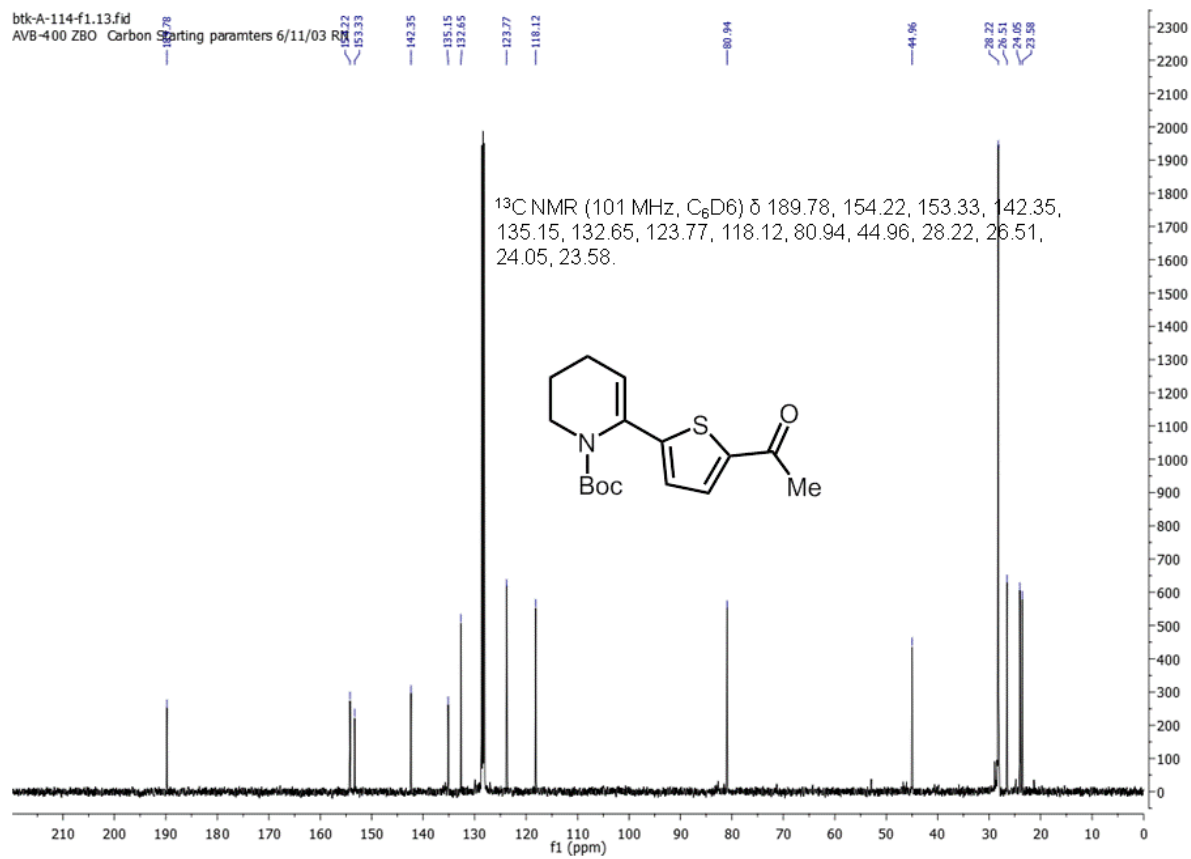

btk-A-114-f1.3.fid  
 AVB-400 ZBO Carbon Starting paramters 6/11/03 RN

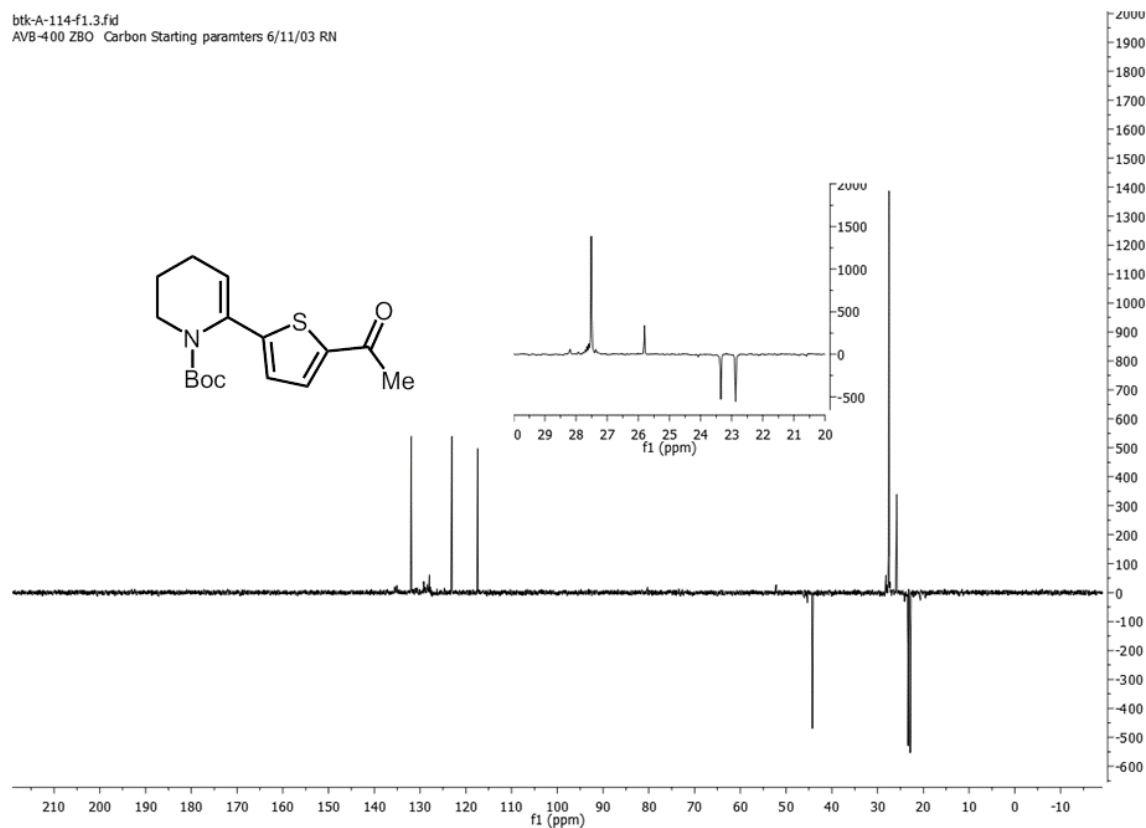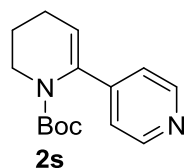

Prepared from **1c** (183 mg, 1.0 mmol) and 4-pyridylboronic acid (1.5 equiv), using **General Procedure A**. Purification: Flash chromatography on silica (pretreated with 1% Et<sub>3</sub>N) eluting with DCM/MeOH (95:5). Yield = 180 mg; 69%. <sup>1</sup>H NMR (400 MHz, C<sub>6</sub>D<sub>6</sub>) δ 8.56 to 8.55 (2H), 6.92 to 6.90 (2H), 4.99 to 4.97 (1H), 3.56 to 3.53 (2H), 1.71 to 1.66 (2H), 1.45 to 1.37 (2H), 1.07 (9H). <sup>13</sup>C NMR (101 MHz, C<sub>6</sub>D<sub>6</sub>) δ 153.1, 149.8, 148.1, 138.6, 119.9, 116.9, 80.2, 43.9, 27.4, 23.4, 23.0. HRMS calc for C<sub>15</sub>H<sub>20</sub>N<sub>2</sub>O<sub>2</sub> 260.1525, found 260.1521. Data as previously reported by us.<sup>3</sup>

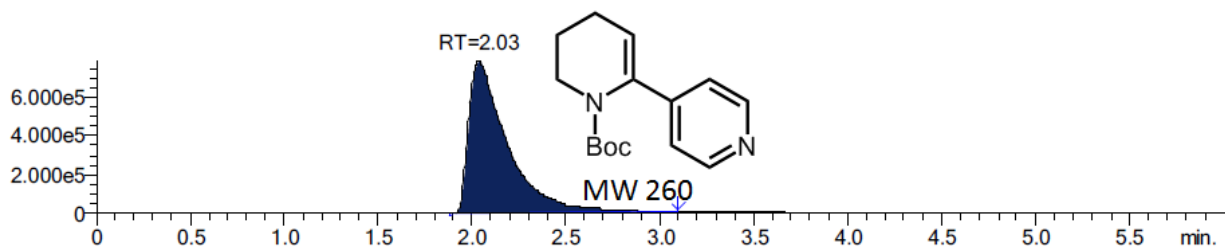

**MS Spectrum**

Group#1 - MS Mass(261) Peak: 28, RT: 1.84 to 2.41 min

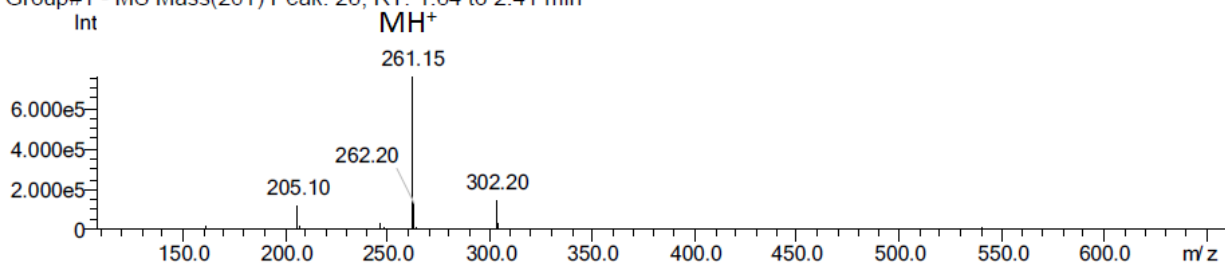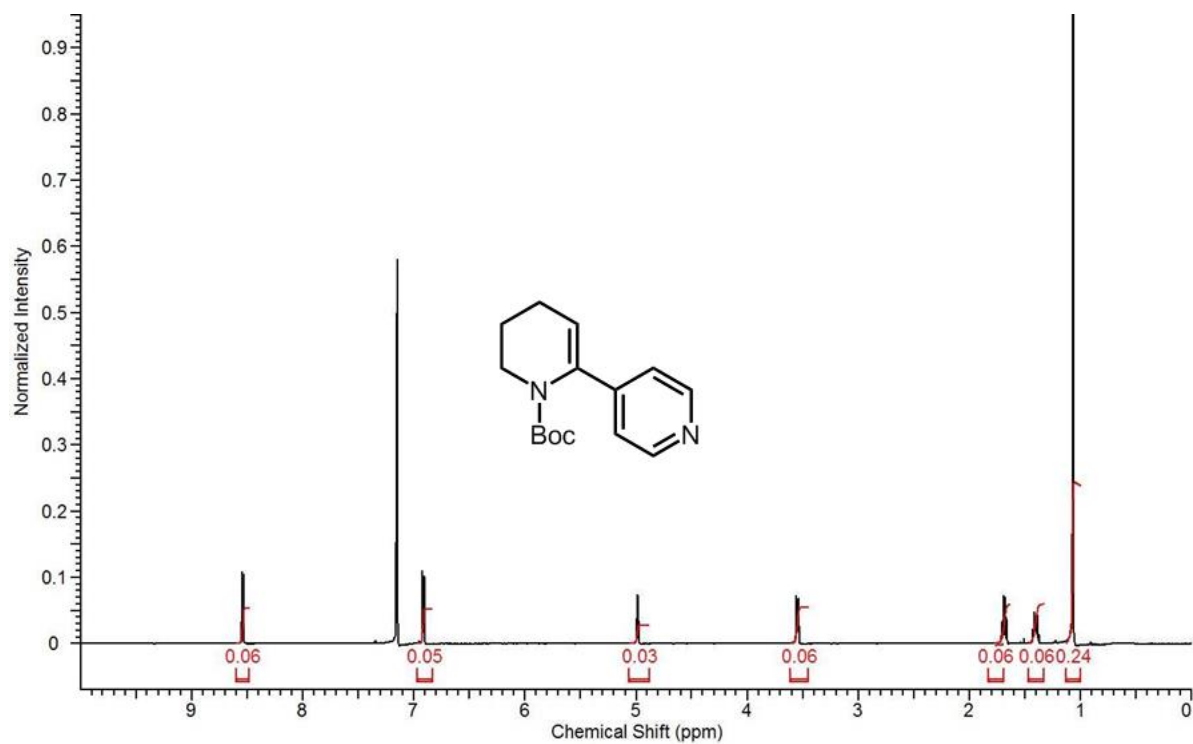

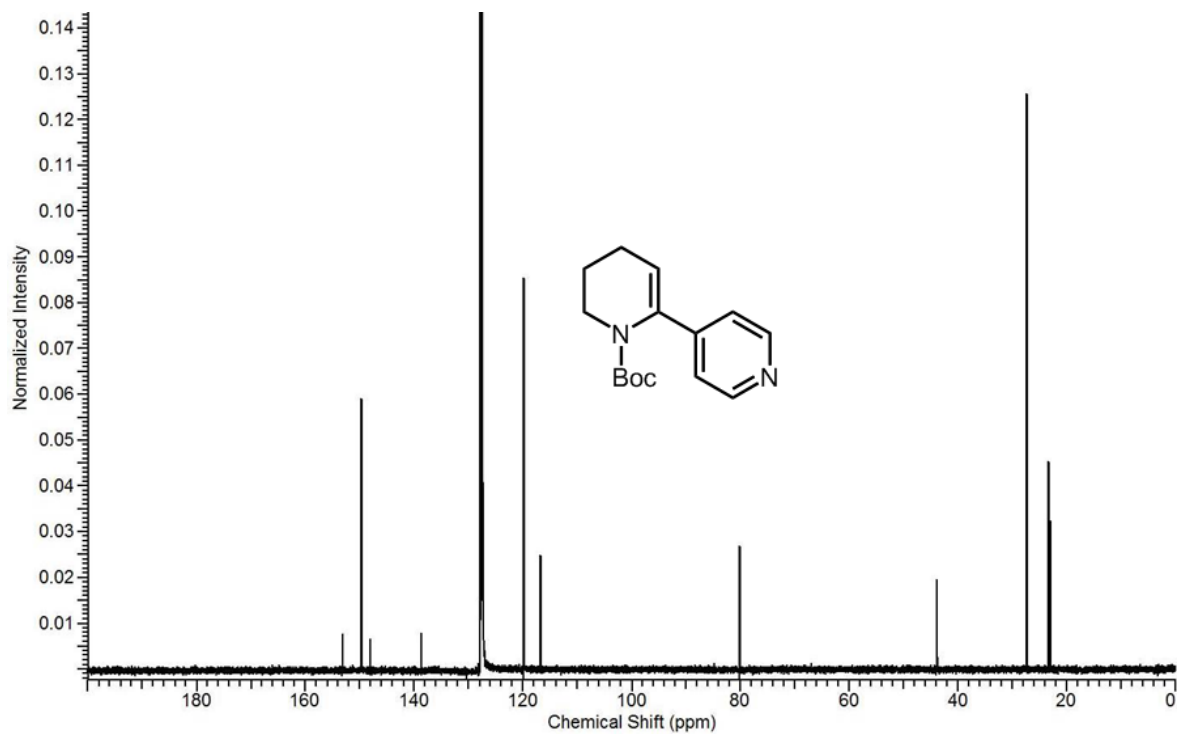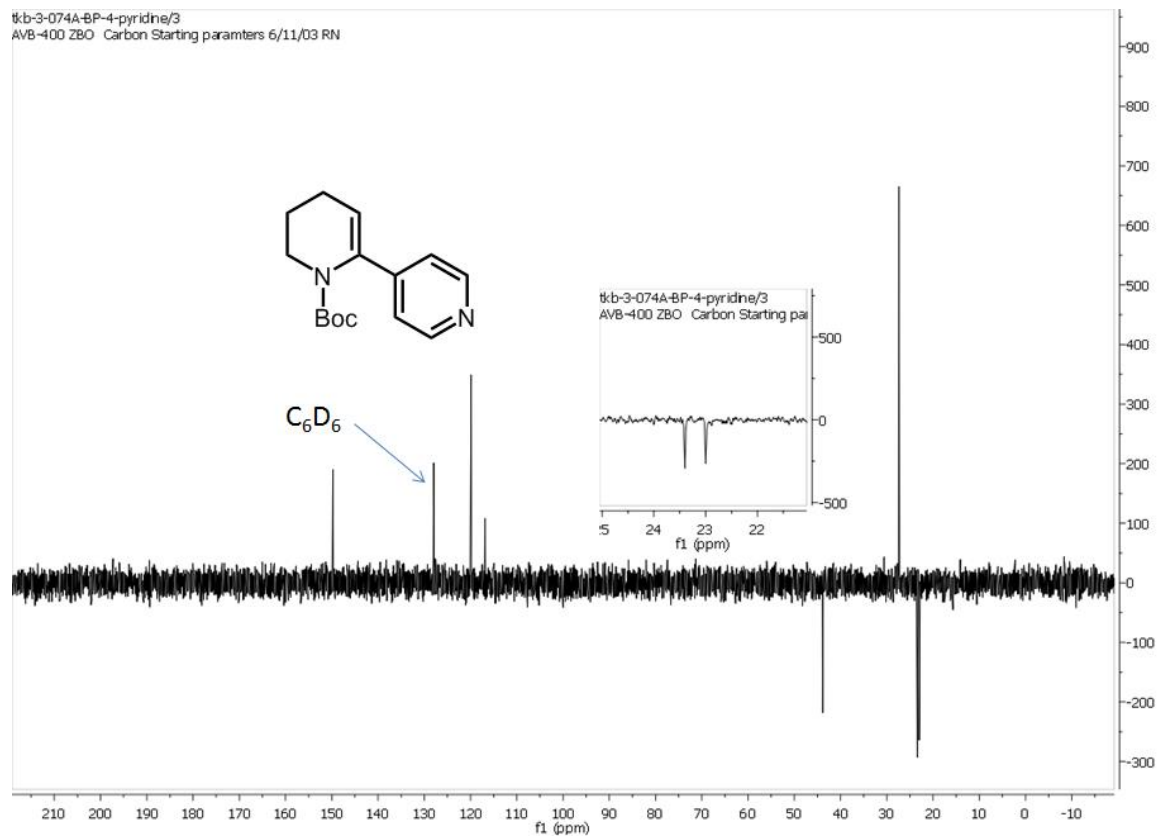



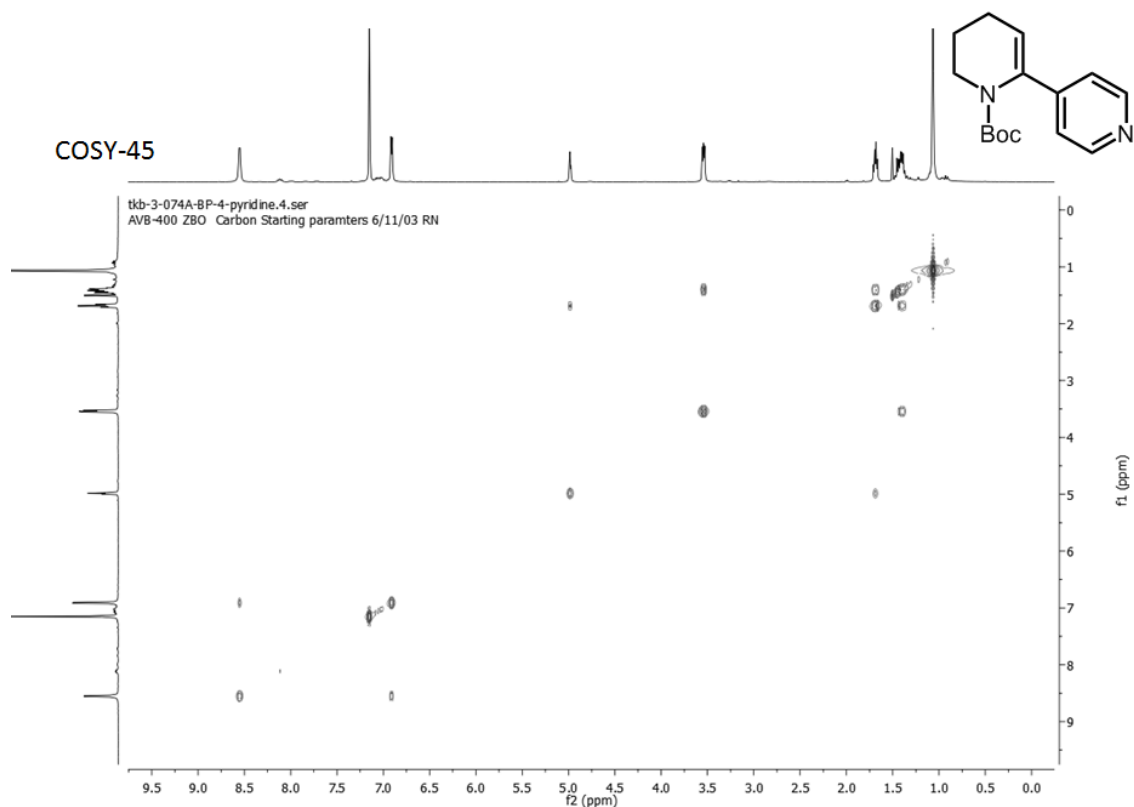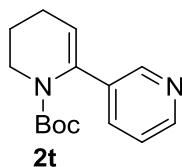

Prepared from **1c** (183 mg, 1.0 mmol) and 3-pyridylboronic acid (1.5 equiv), using **General Procedure A**. Purification: Flash chromatography on silica (pretreated with 1% Et<sub>3</sub>N) eluting with DCM/MeOH (98:2). Yield = 148 mg; 57%. <sup>1</sup>H NMR (400 MHz, C<sub>6</sub>D<sub>6</sub>) δ 8.79 & 8.78 (1H), 8.47 to 8.45 (1H), 7.26 to 7.23 (1H), 6.76 to 6.72 (1H), 4.95 to 4.93 (1H), 3.59 to 3.57 (2H), 1.75 to 1.70 (2H), 1.51 to 1.03 (11H). <sup>13</sup>C NMR (101 MHz, C<sub>6</sub>D<sub>6</sub>) δ 153.9, 148.7, 147.9, 138.3, 137.2, 132.6, 123.0, 116.4, 80.5, 44.7, 28.1, 24.1, 23.8. HRMS calc for C<sub>15</sub>H<sub>20</sub>N<sub>2</sub>O<sub>2</sub> 260.1525, found 260.1522.

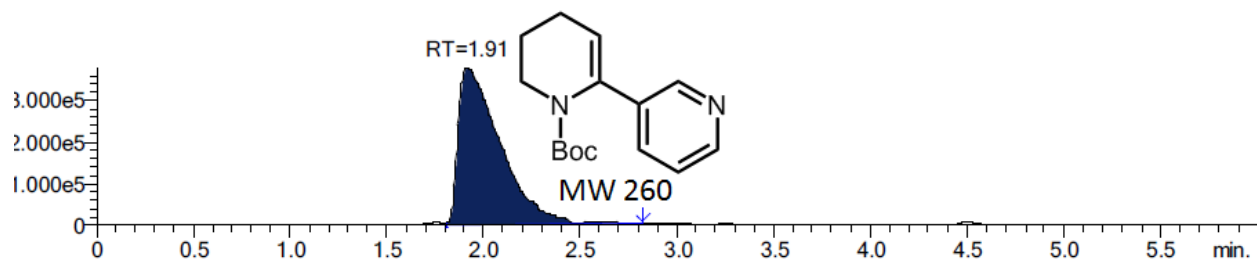

**MS Spectrum**

Group#1 - MS Mass(205) Peak: 26, RT: 1.80 to 2.37 min

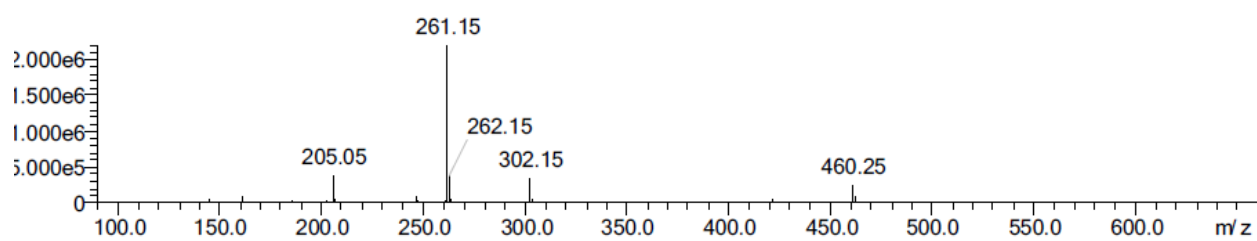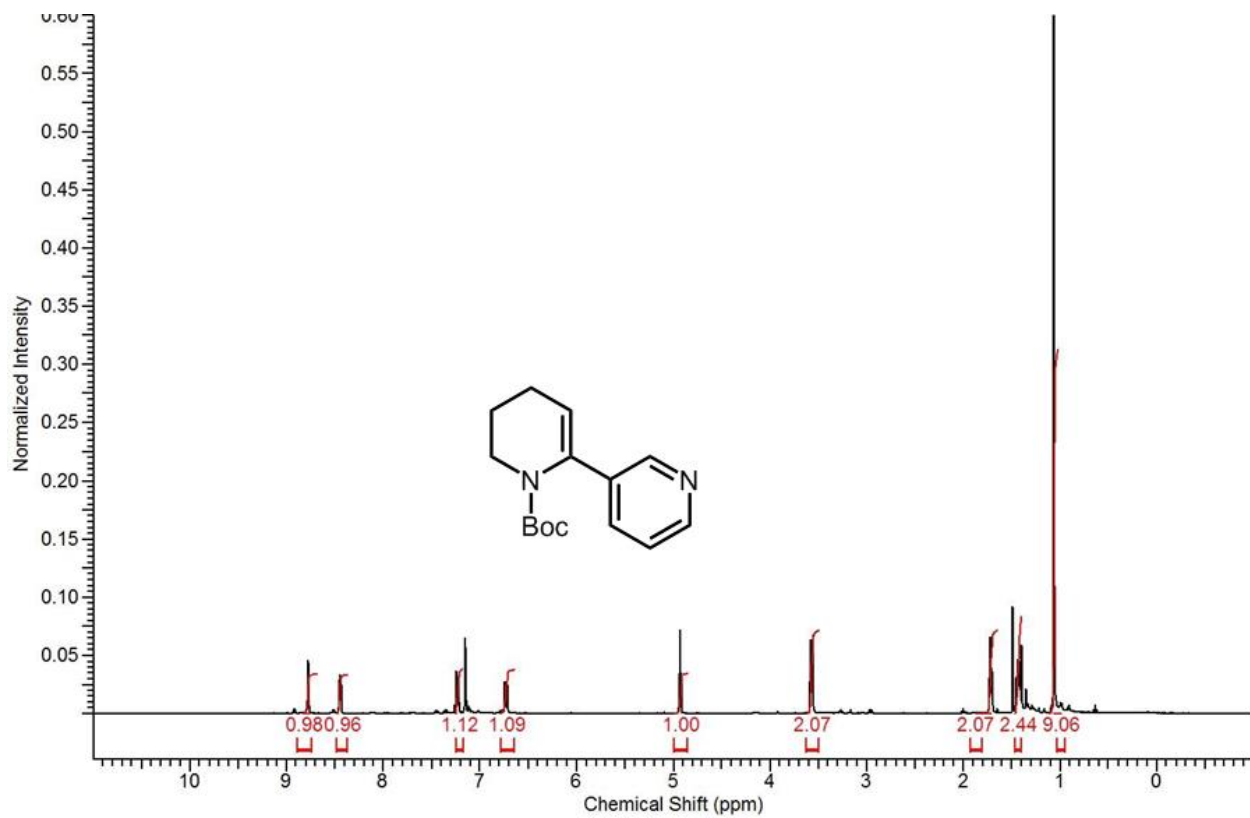

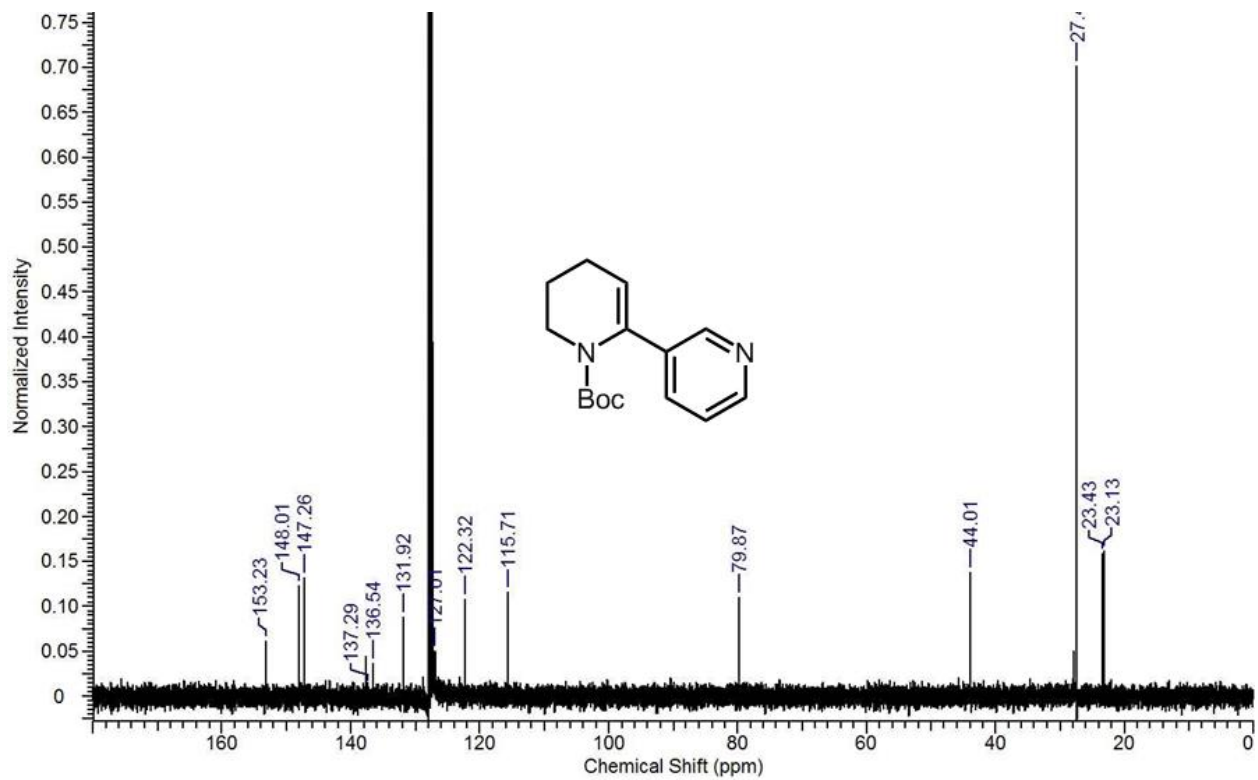

tcb-3-060C-f2.3.fid  
 AVB-400 Z80 Carbon Starting paramters 6/11/03 RN

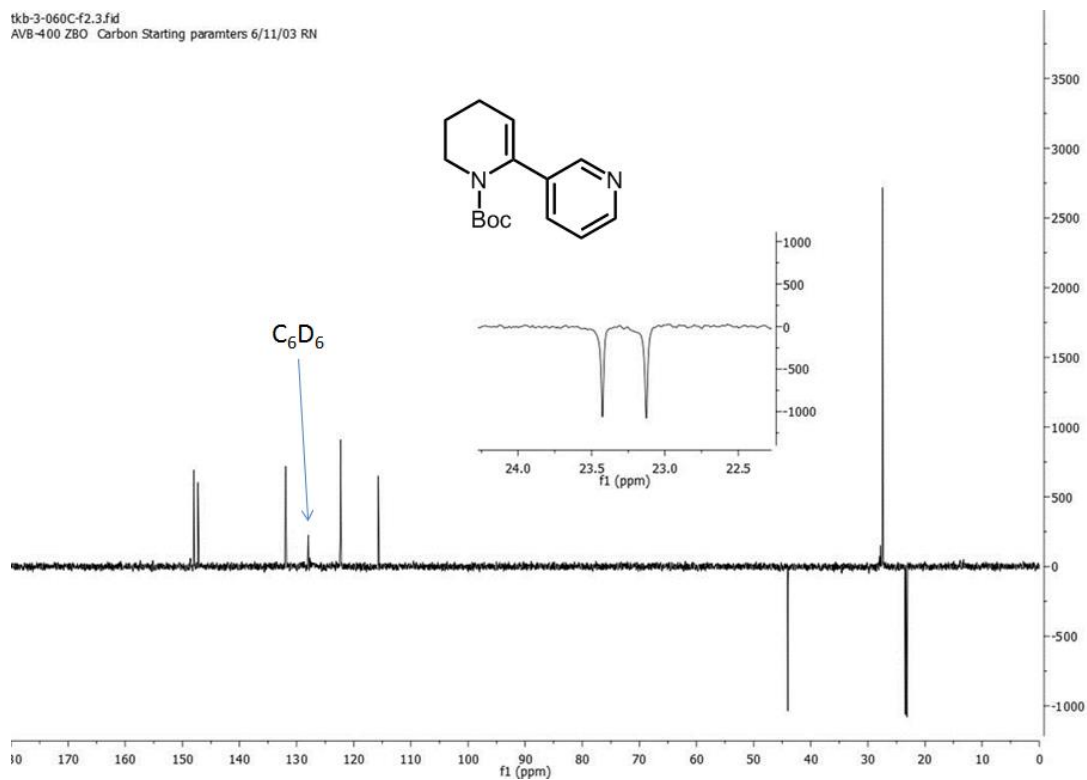

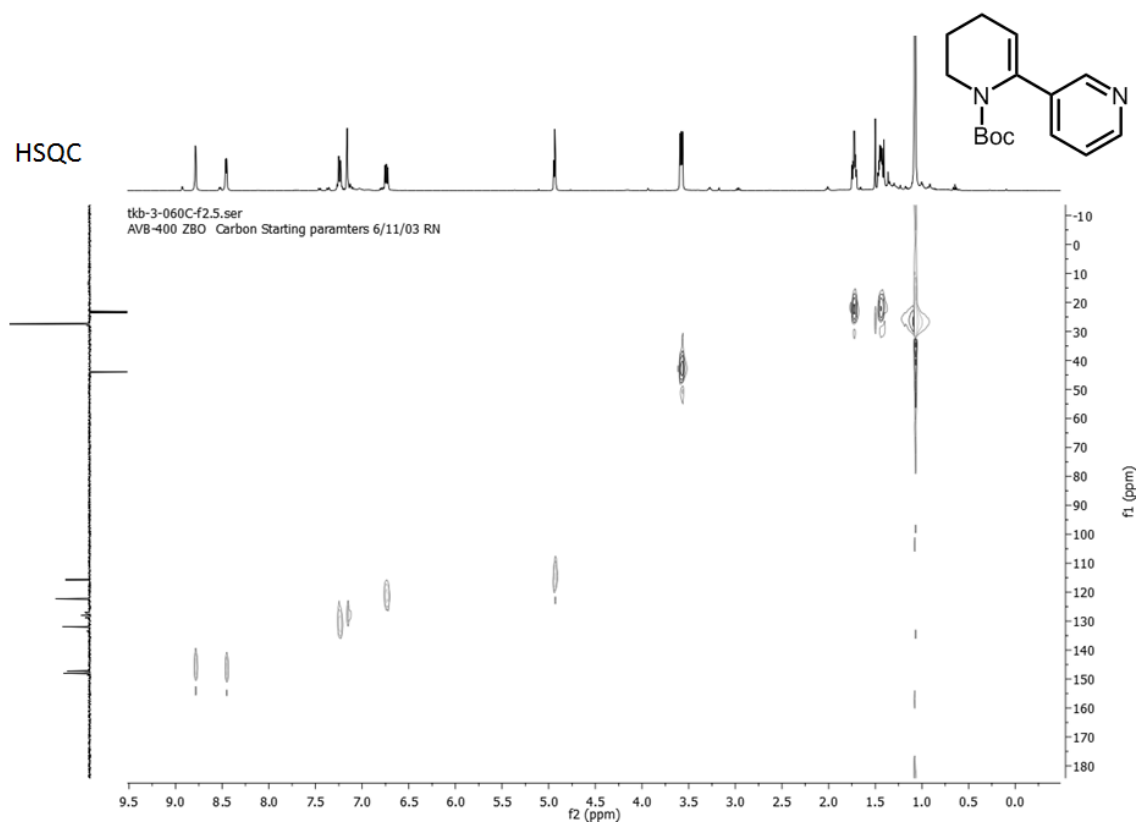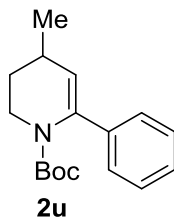

Prepared from **1d** (197 mg, 1.0 mmol) and phenylboronic acid (1.5 equiv), using **General Procedure A**. Purification: Flash chromatography on silica (pretreated with 1% Et<sub>3</sub>N). PE/DCM (2:1). Yield = 53.2 mg; 78%. <sup>1</sup>H NMR (400 MHz, C<sub>6</sub>D<sub>6</sub>, mixture of rotamers) δ 7.45 to 6.99 (5H), 5.01 (1H), 3.91 to 3.55 (2H), 2.09 to 2.03 (1H), 1.68 to 1.50 (1H), 1.46 to 1.02 (11H), 0.86 to 0.60 (3H). <sup>13</sup>C NMR (101 MHz, C<sub>6</sub>D<sub>6</sub>, mixture of rotamers) δ 153.5, 141.3, 141.3, 139.5, 128.6, 127.0, 126.6, 125.6, 120.0, 79.5, 78.3, 42.7, 31.5, 28.8, 28.2, 27.9, 27.4, 21.5, 21.1. HRMS calc for C<sub>17</sub>H<sub>23</sub>NO<sub>2</sub> 273.1729, found 273.1734.

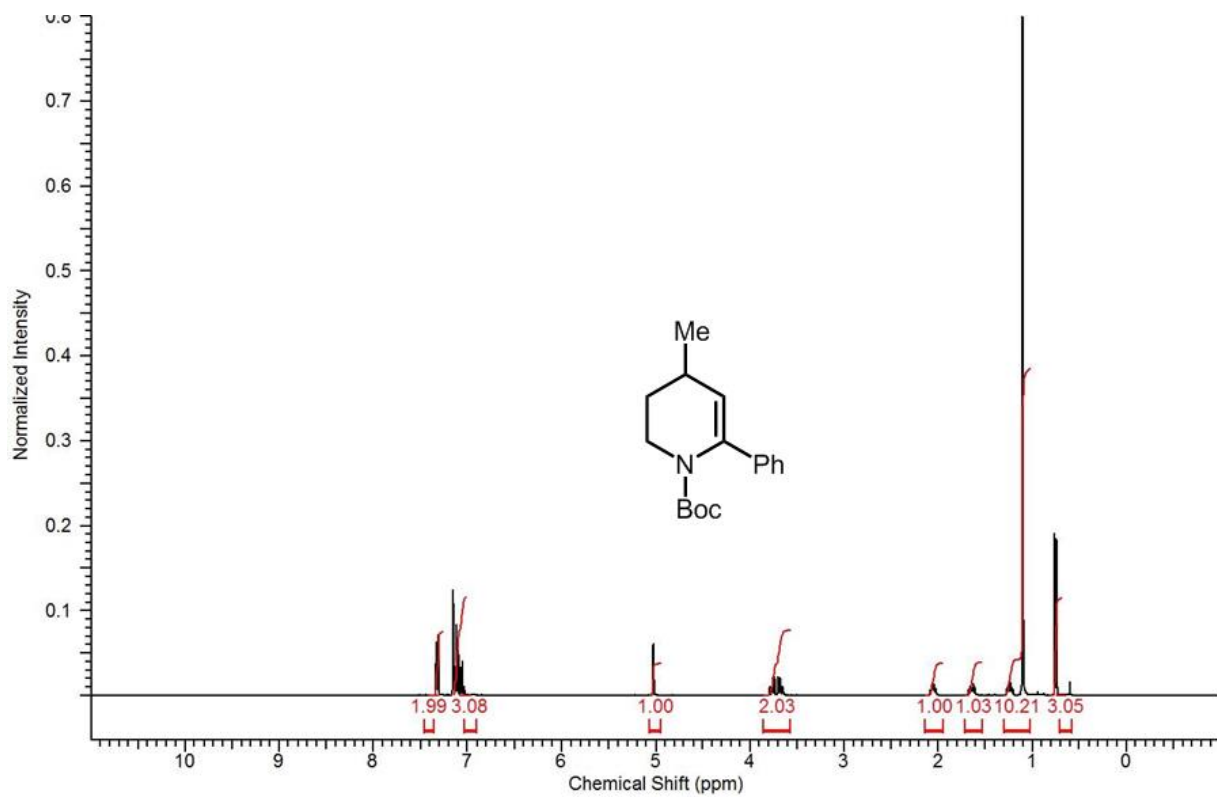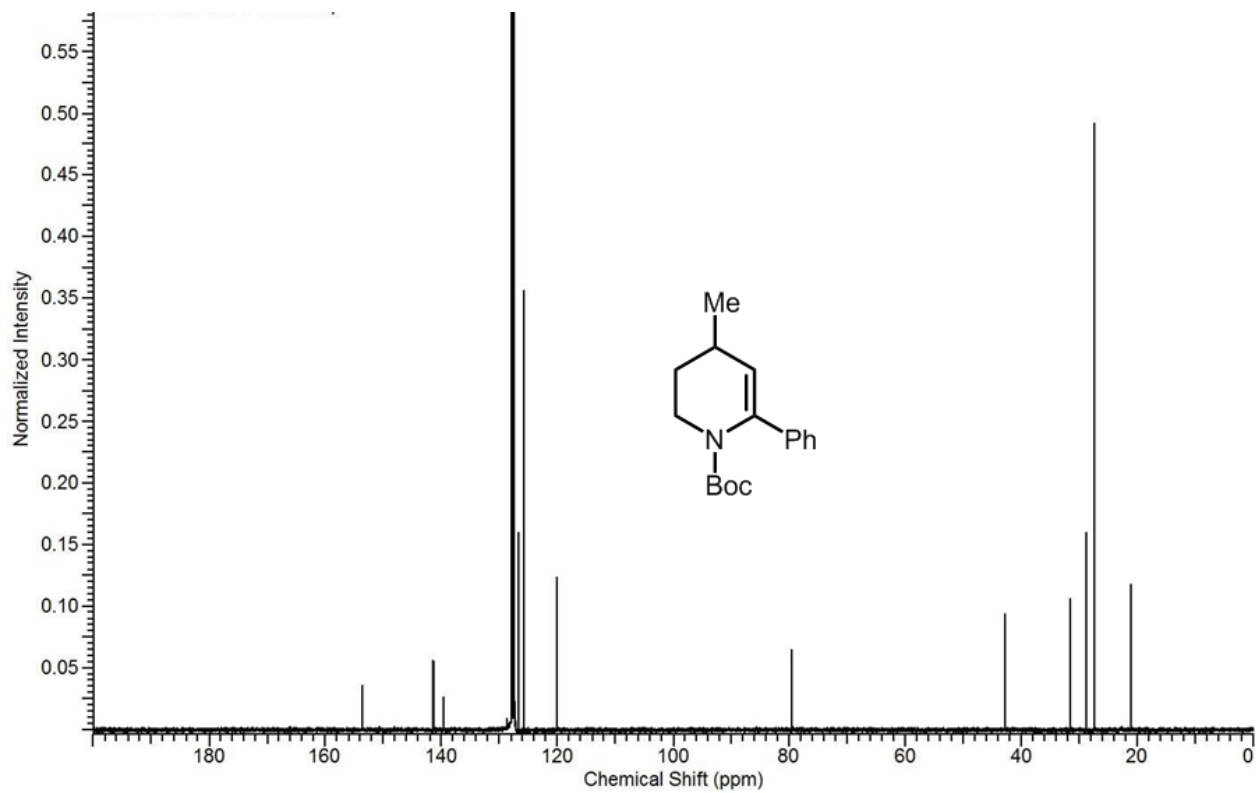

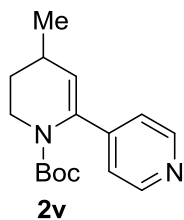

Prepared from **1d** (197 mg, 1.00 mmol) and 4-pyridylboronic acid (1.5 equiv), using **General Procedure A**. Purification: Flash chromatography on silica (pretreated with 1% Et<sub>3</sub>N) eluting with DCM/MeOH (95:5). Yield = 16.4 mg; 60%. <sup>1</sup>H NMR (400 MHz, C<sub>6</sub>D<sub>6</sub>) δ 8.56 & 8.55 (2H), 6.94 to 6.92 (2H), 4.97 & 4.96 (1H), 3.62 to 3.56 (2H), 1.98 to 1.92 (1H), 1.59 to 1.03 (11H), 0.72 to 0.69 (3H). <sup>13</sup>C NMR (101 MHz, C<sub>6</sub>D<sub>6</sub>) δ 153.1, 149.7, 137.6, 135.5, 122.5, 120.0, 80.3, 42.5, 31.1, 28.8, 27.3, 20.7. HRMS calc for C<sub>16</sub>H<sub>22</sub>N<sub>2</sub>O<sub>2</sub> 274.1681, found 274.1679.

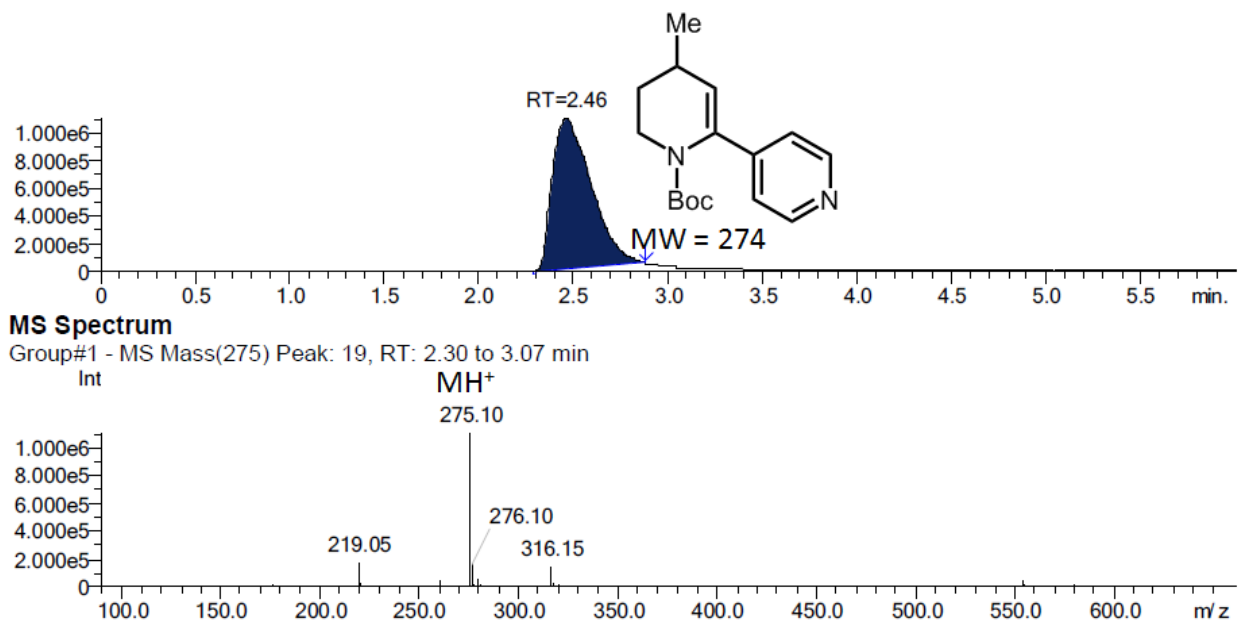

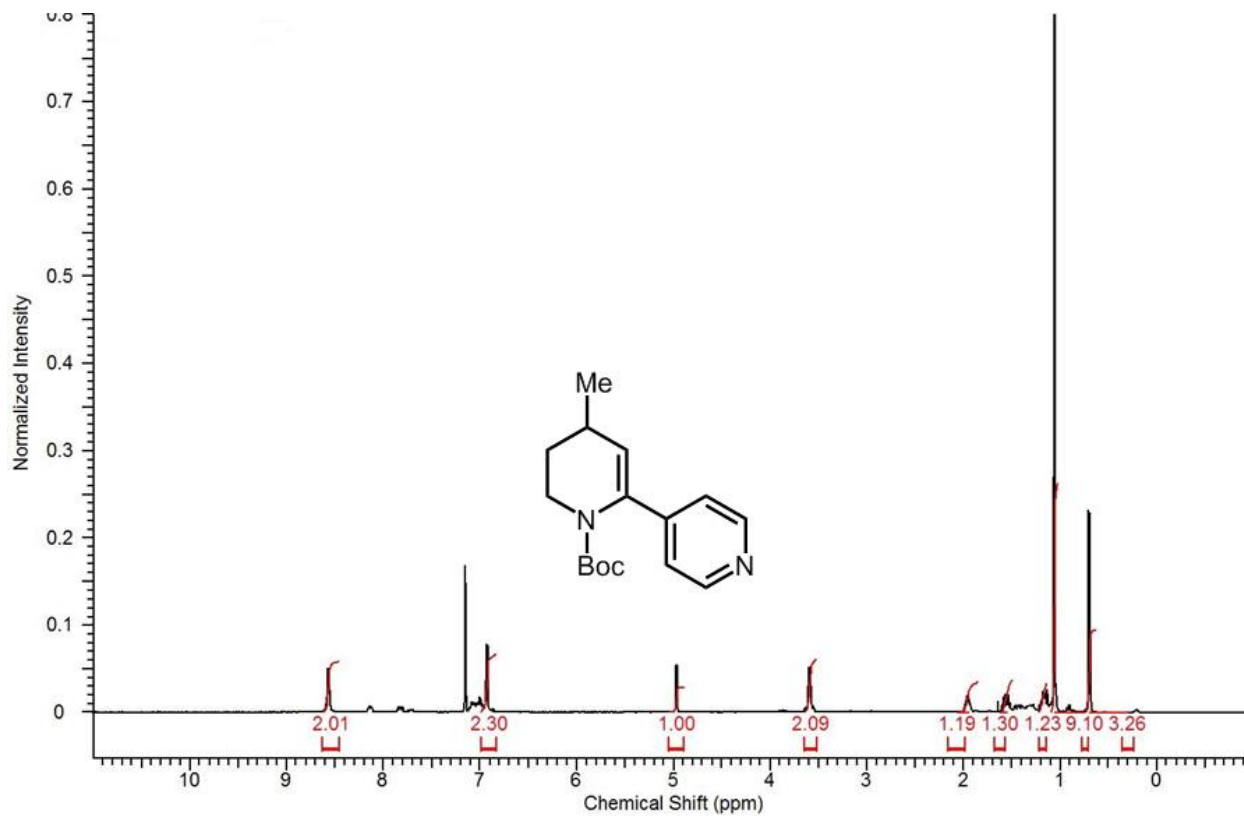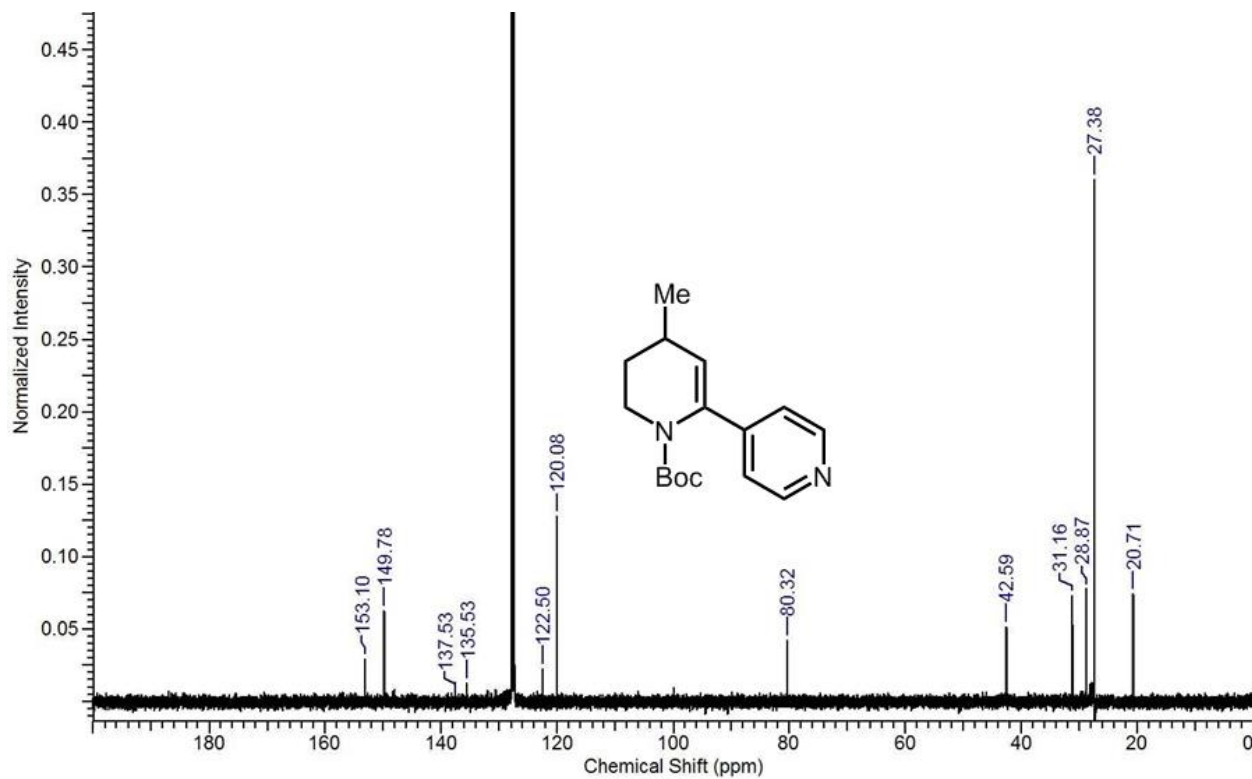

tkb-3-120A-f3.3.fid  
AVB-400 Z80 Carbon Starting parameters 6/11/03 RN

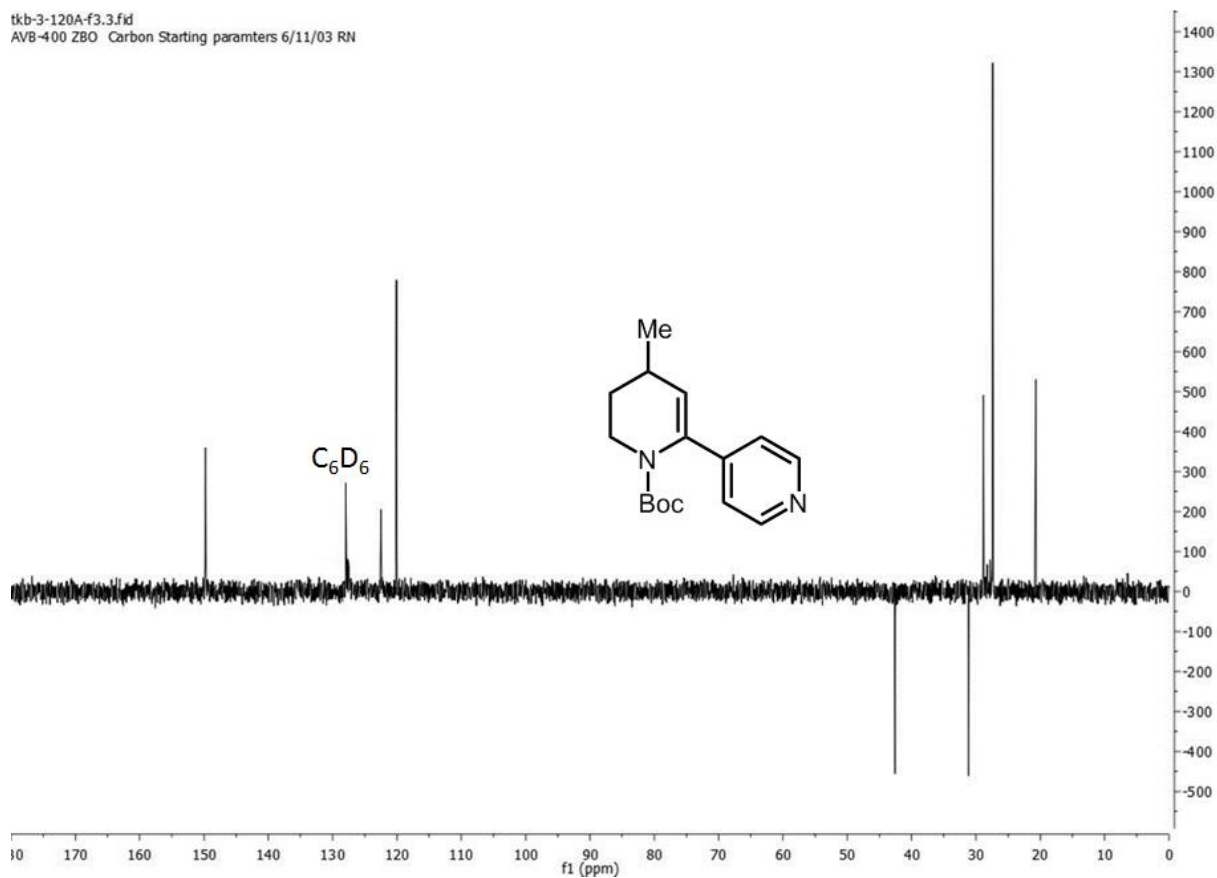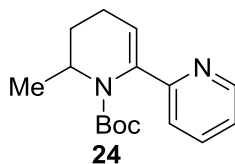

Prepared from enecarbamate **1e** (197 mg, 1.0 mmol) and 2-pyridylboronic acid (1.5 equiv), using **General Procedure A**. Yield = 186 mg, 68%.  $^1\text{H}$  NMR (400 MHz,  $\text{C}_6\text{D}_6$ )  $\delta$  8.39 (1H), 7.04 (1H), 6.90 to 6.73 (1H), 6.47 to 6.43 (1H), 5.55 to 5.52 (1H), 4.78 to 4.74 (1H), 1.68 to 0.92 (16H).  $^{13}\text{C}$  NMR (101 MHz,  $\text{C}_6\text{D}_6$ )  $\delta$  152.7, 150.0, 144.2, 135.1, 126.4, 122.1, 121.8, 80.7, 46.5, 28.1, 26.5, 19.7, 15.6. **HRMS** calcd. for  $\text{C}_{16}\text{H}_{22}\text{N}_2\text{O}_2$  274.1681; found, 274.1685.



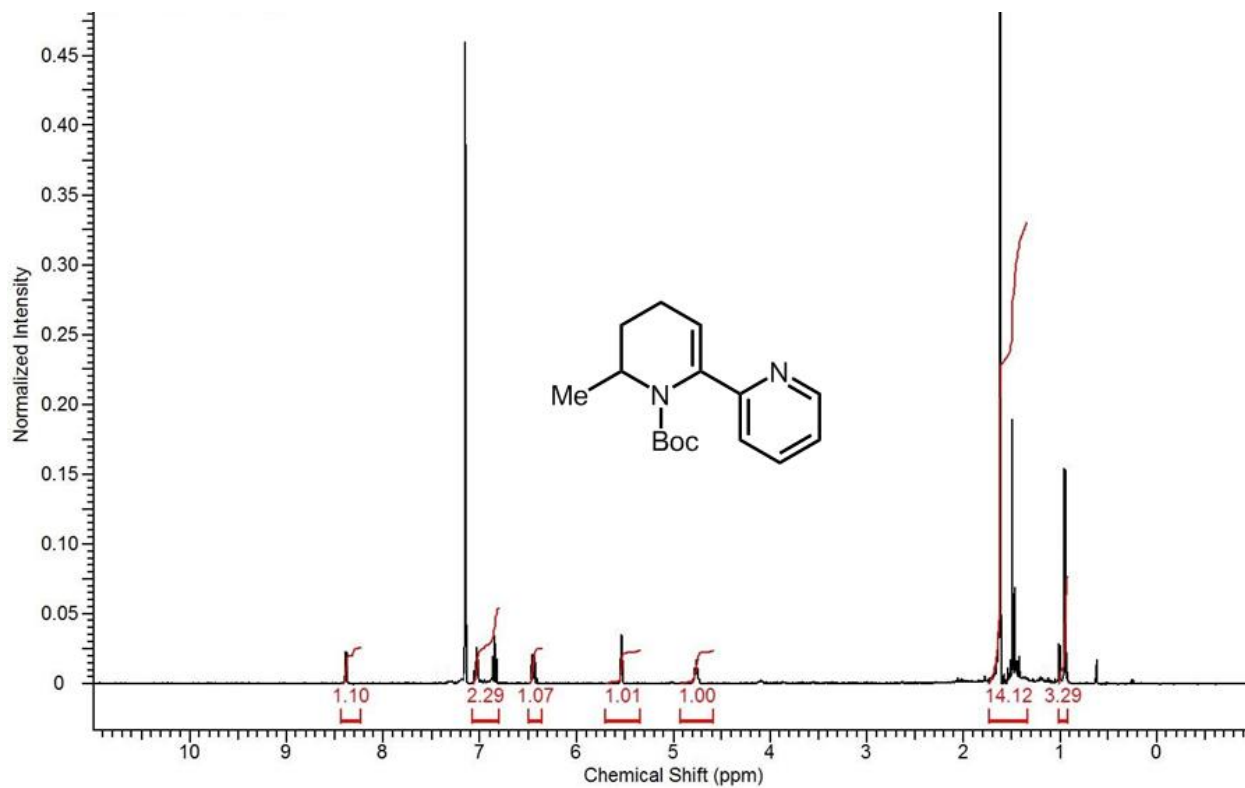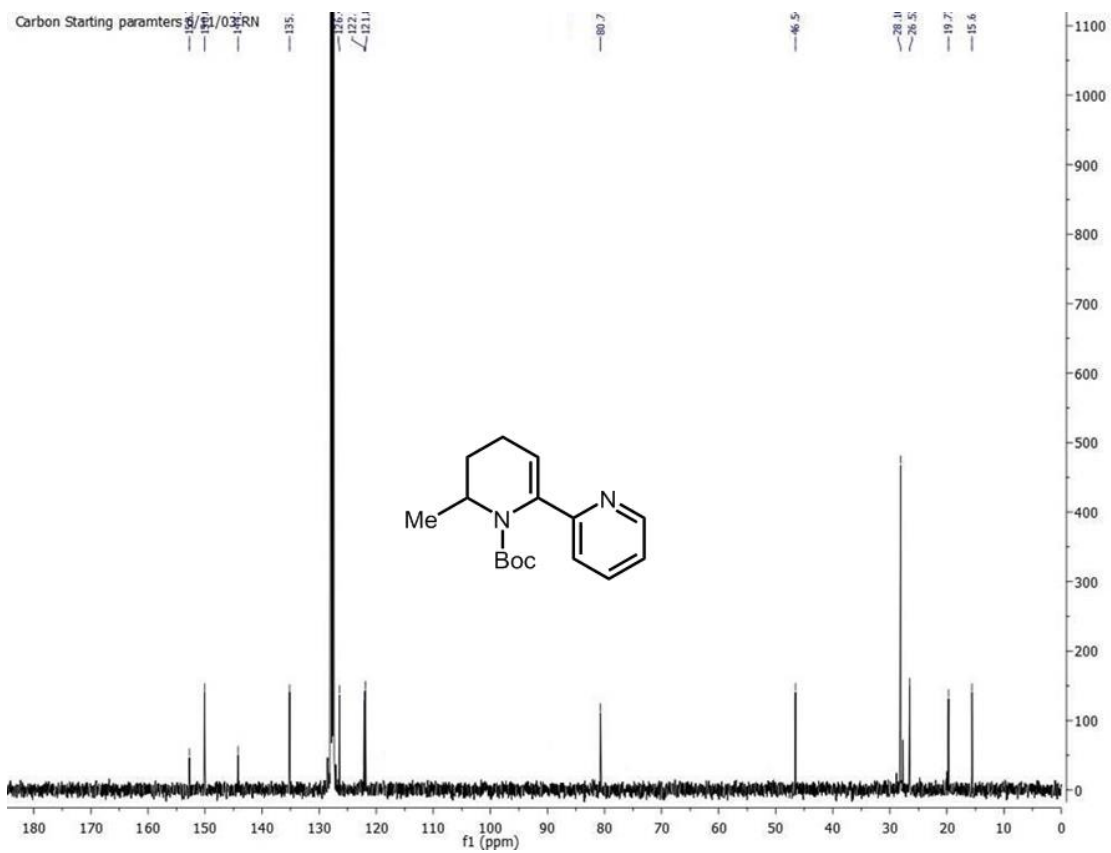

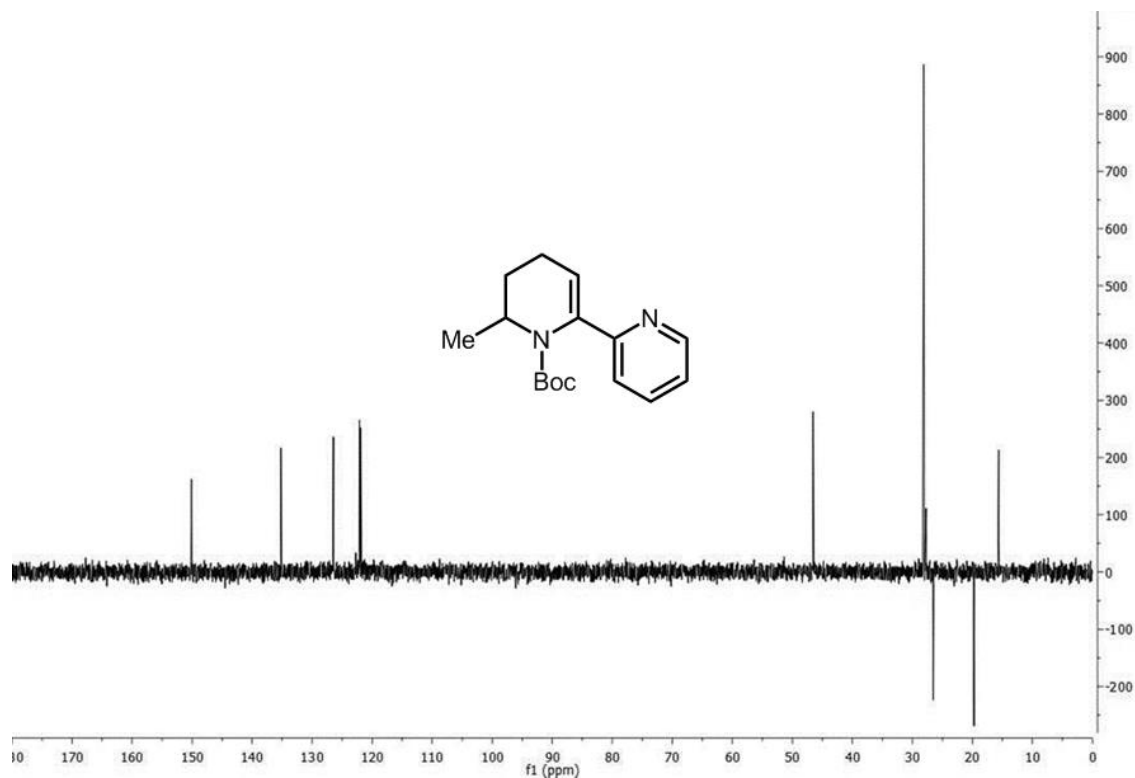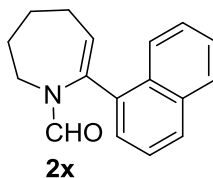

Prepared from **1f** (125 mg, 1 mmol) and 1-naphthyl boronic acid (258 mg, 1.5 equiv), using **General Procedure A**. Time = 12 h. Purification: Flash chromatography on silica (pretreated with 1% Et<sub>3</sub>N) eluting with hexane/EtOAc (70:30). Yield = 183 mg, 73%. <sup>1</sup>H NMR (400 MHz, C<sub>6</sub>D<sub>6</sub>) δ 8.07 (1H), 7.91 to 7.86 (1H), 7.61 to 7.51 (2H), 7.31 to 7.09 (4H), 5.21 to 5.19 (1H), 3.92 to 3.86 (2H), 1.97 to 1.91 (2H), 1.67 to 1.61 (2H), 1.46 to 1.40 (2H). <sup>13</sup>C NMR (101 MHz, C<sub>6</sub>D<sub>6</sub>) δ 161.6, 141.3, 136.5, 134.0, 131.2, 129.0, 128.6, 126.6, 125.9, 125.1, 124.9, 122.2, 119.1, 44.8, 27.4, 27.1, 24.2. HRMS calc for C<sub>17</sub>H<sub>17</sub>NO 251.1310, found 251.1315. Data as previously reported.<sup>4</sup>

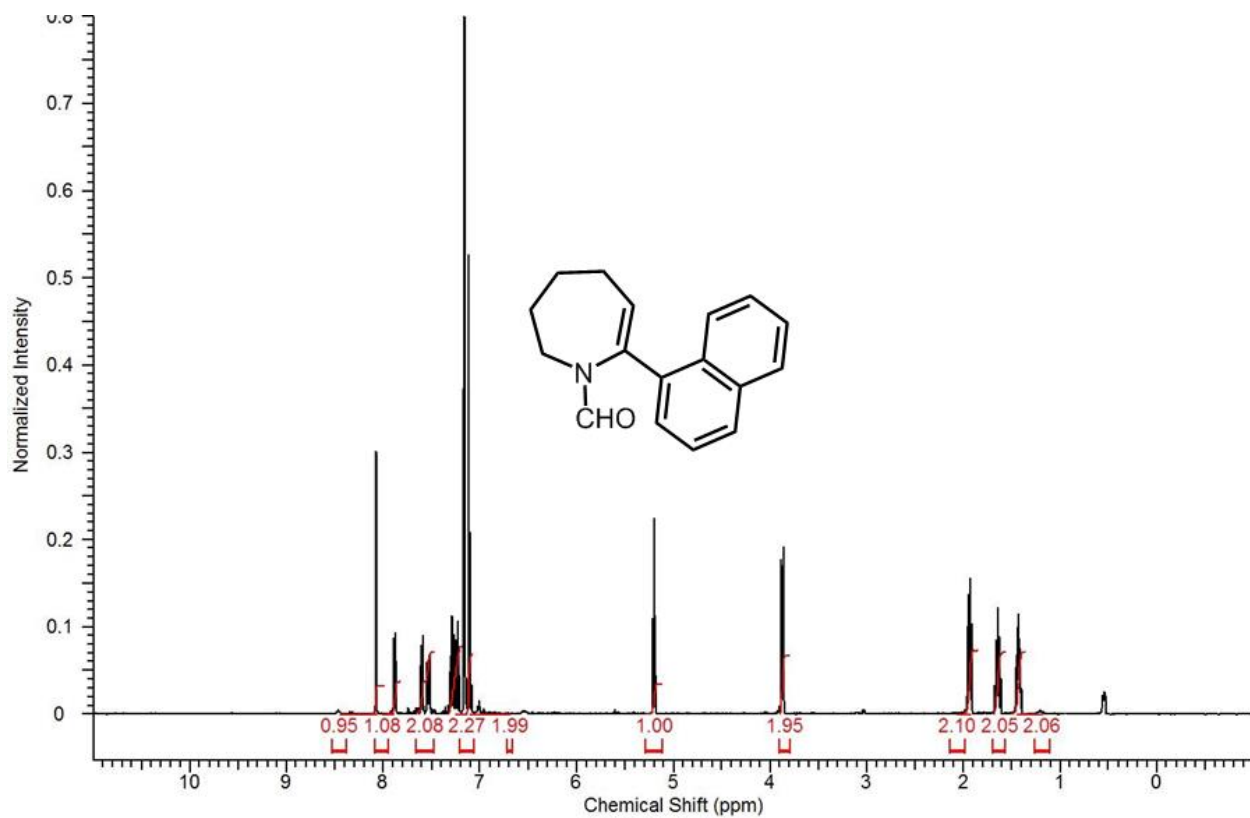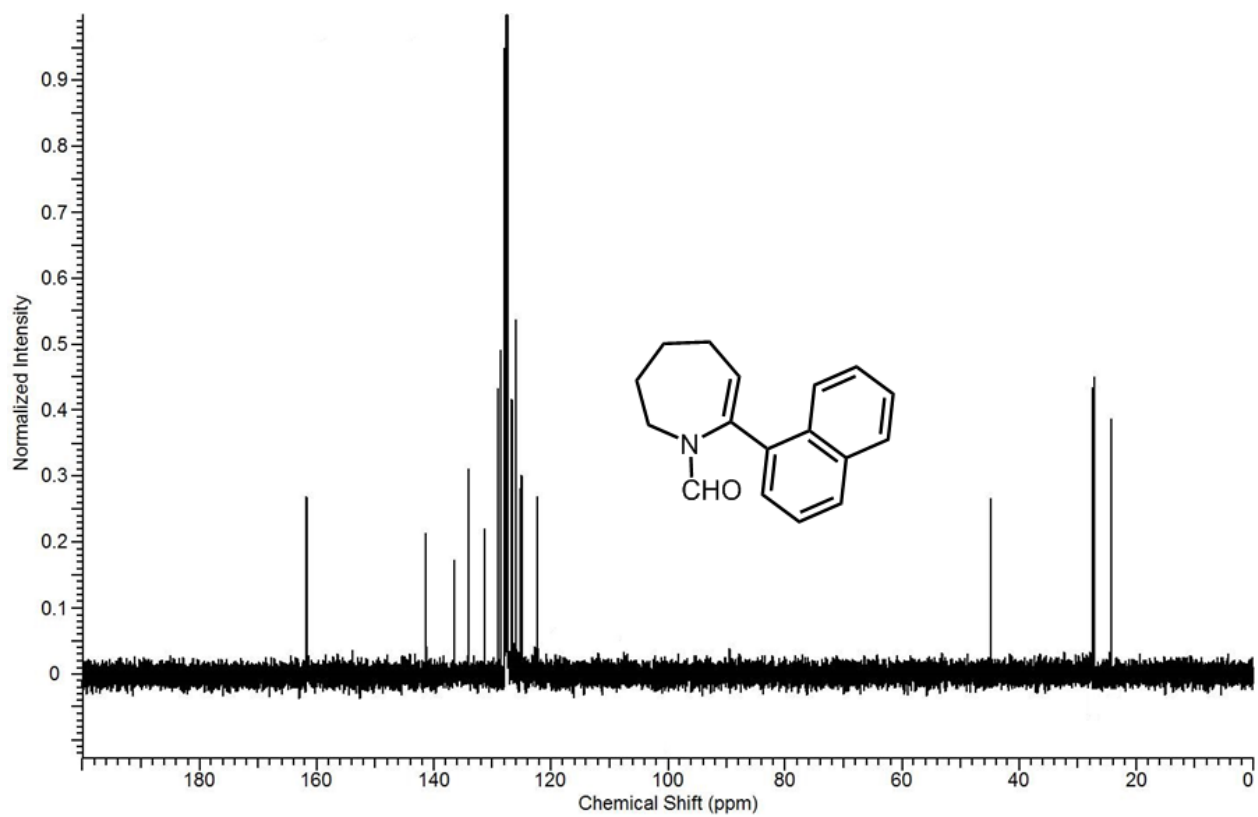

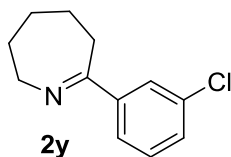

Prepared from **1f** (125 mg, 1 mmol) and 3-chlorophenylboronic acid (188 mg, 1.2 equiv), using **General Procedure A**. Time = 12 h. The crude product was deformylated as follows:

To the crude eneformamide dissolved in freshly distilled THF (5 mL) was added *n*-BuLi (0.6 mL, 1.2 mmol, 2.0 M in hexanes, 1.2 equiv) at  $-78$  °C. After complete deprotection of the eneformamide (~30 min, as indicated by TLC and LCMS-monitoring), the mixture was quenched with H<sub>2</sub>O and diluted with EtOAc. It was washed with *sat.* NaHCO<sub>3</sub> and with brine. The organic layer was dried over Na<sub>2</sub>SO<sub>4</sub> and concentrated under reduced pressure to give the product as an oil. Yield = 162 mg, 78%. <sup>13</sup>C NMR (101 MHz, C<sub>6</sub>D<sub>6</sub>)  $\delta$  171.4, 142.9, 134.1, 129.2, 128.9, 127.0, 124.8, 52.1, 31.1, 29.6, 25.8, 23.1. HRMS calc for C<sub>12</sub>H<sub>14</sub>ClN 207.0815, found 207.0811.

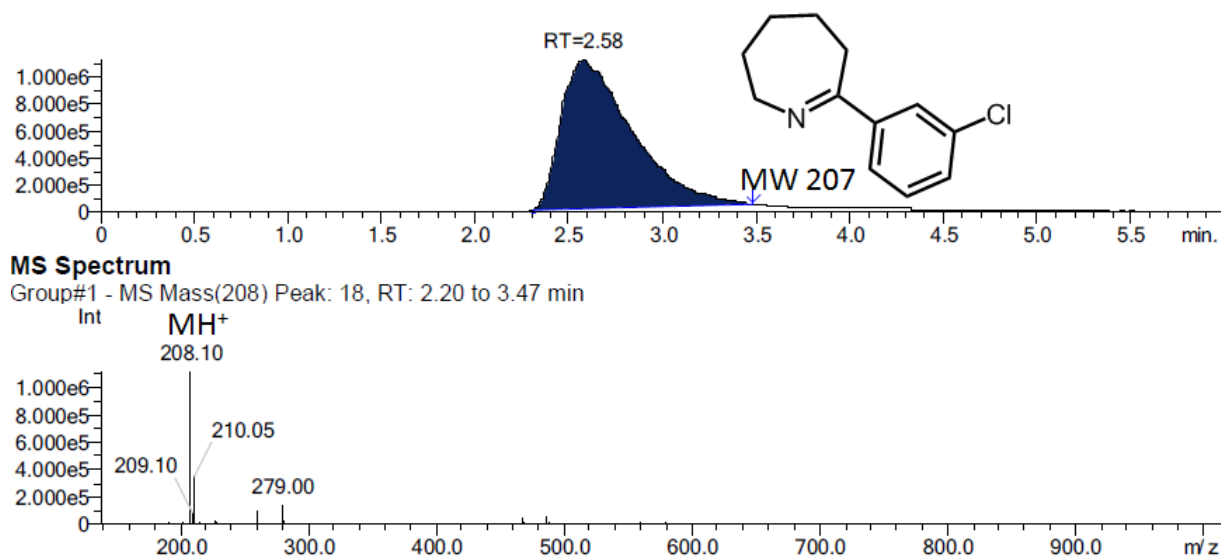

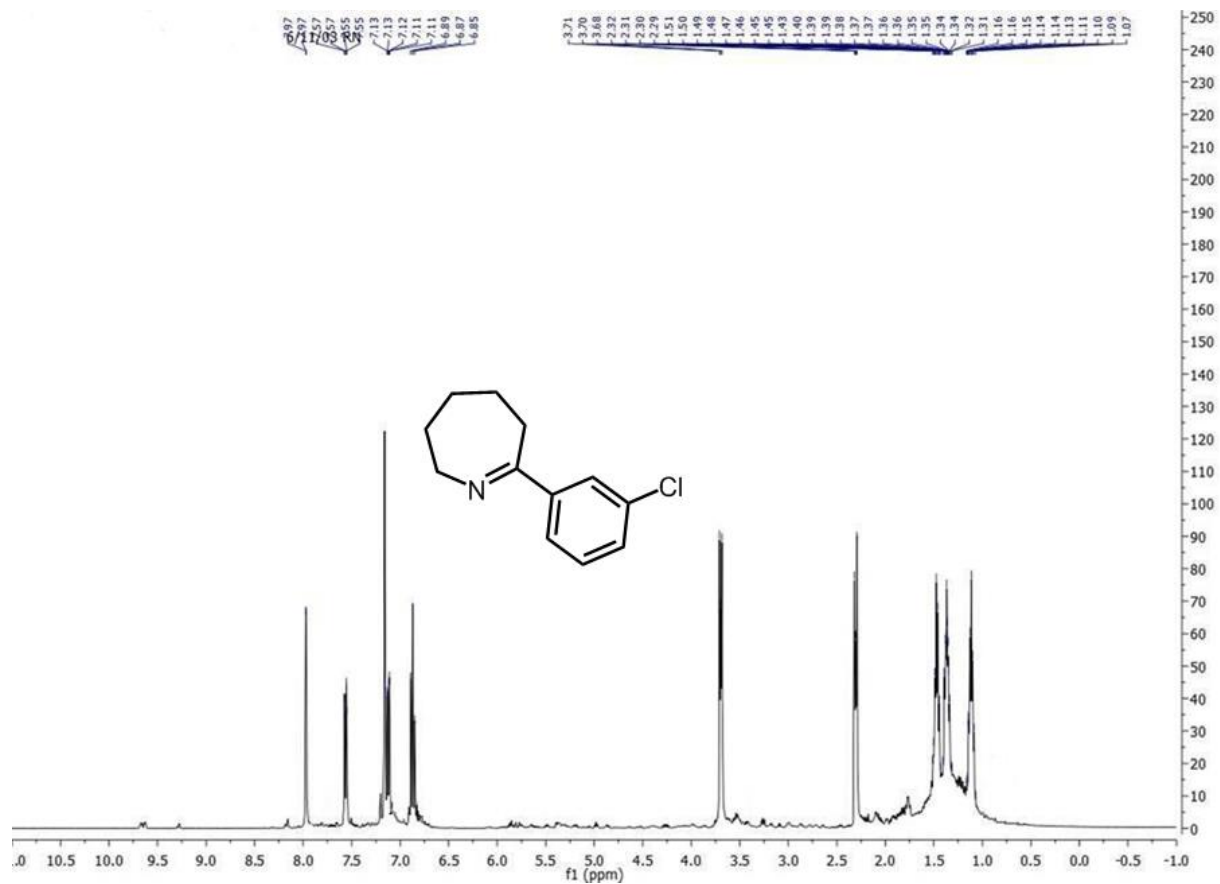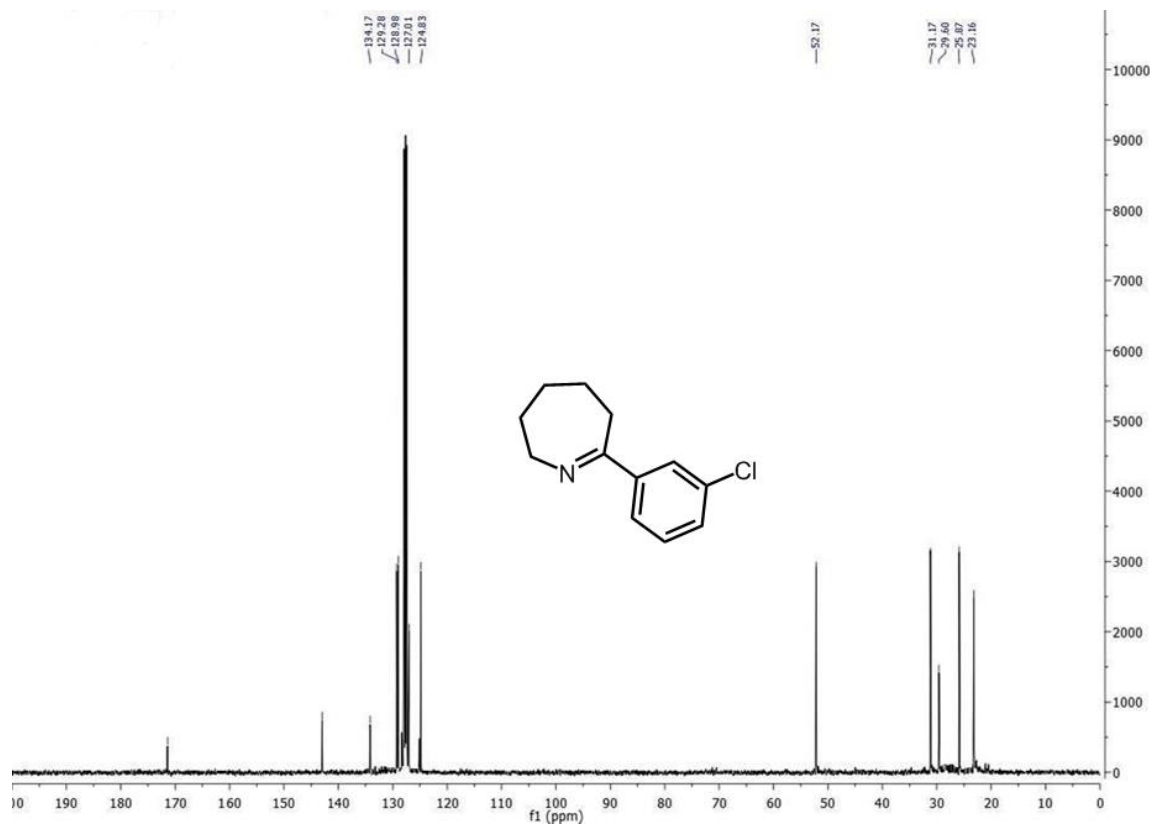

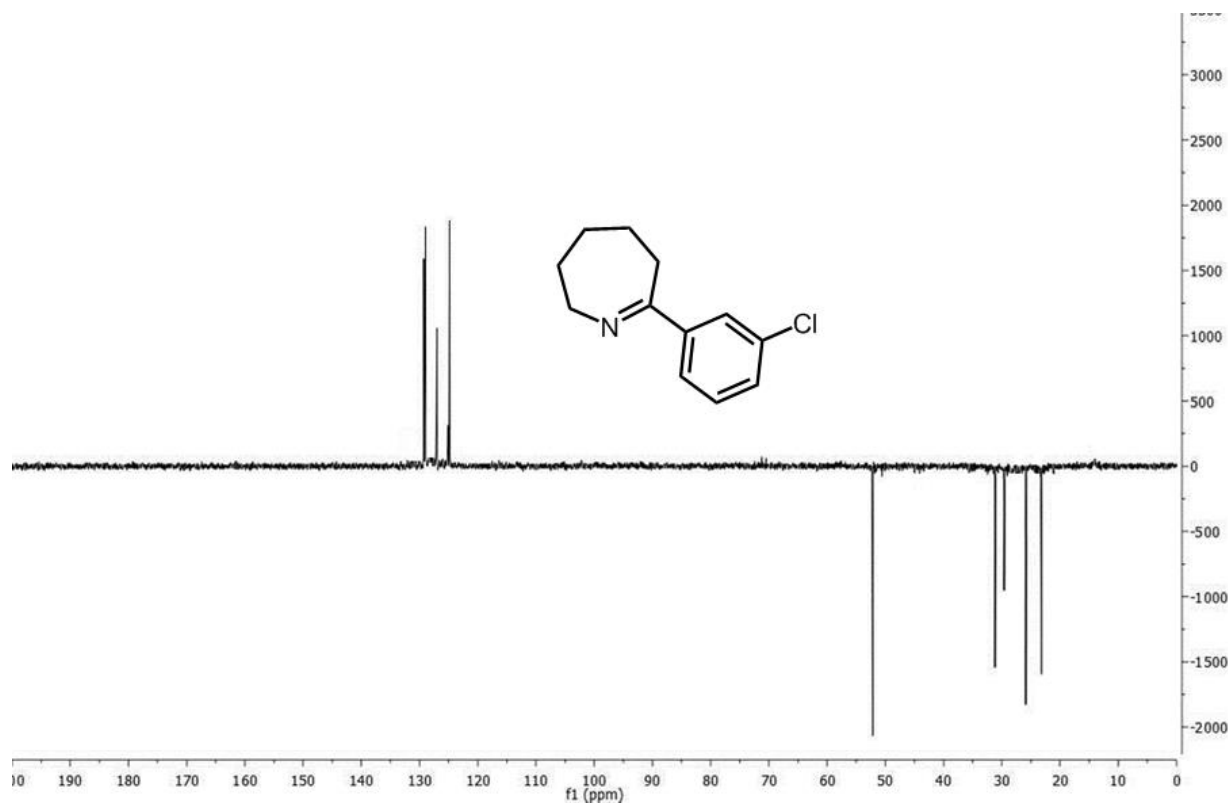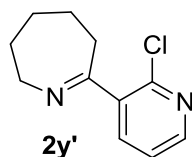

Prepared from **1f** (125 mg, 1.0 mmol), 2-chloro-3-pyridylboronic acid (236 mg, 1.5 mmol, 1 equiv), Temp = 90 °C, time = 36 h. The crude product was deformylated as follows:

To the crude eneformamide dissolved in freshly distilled THF (5 mL) was added *n*-BuLi (0.60 mL, 1.2 mmol, 2.0 M in hexanes, 1.2 equiv) at -78 °C. After complete deprotection of the eneformamide (~30 min, as indicated by TLC and LCMS-monitoring), the mixture was quenched with H<sub>2</sub>O and diluted with EtOAc. It was washed with *sat.* NaHCO<sub>3</sub> and then with brine. The organic layer was dried over Na<sub>2</sub>SO<sub>4</sub> and concentrated under reduced pressure to give the product as an oil. Yield = 127 mg, 61%. <sup>1</sup>H NMR (400 MHz, C<sub>6</sub>D<sub>6</sub>) δ 8.01 (1H, d), 7.39 (1H, d), 6.51 to 6.46 (1H, dd), 3.67 to 3.65 (2H, dd), 2.43 to 2.39 (2H, dd), 1.53 to 1.18 (6H, m). <sup>13</sup>C NMR (101 MHz, C<sub>6</sub>D<sub>6</sub>) δ 149.5, 139.0, 128.6, 128.5, 128.3, 128.1, 122.6, 53.6, 34.6, 31.9, 26.6, 24.3. . HRMS calc for C<sub>11</sub>H<sub>13</sub>ClN<sub>2</sub> 208.0767, found 208.0770.

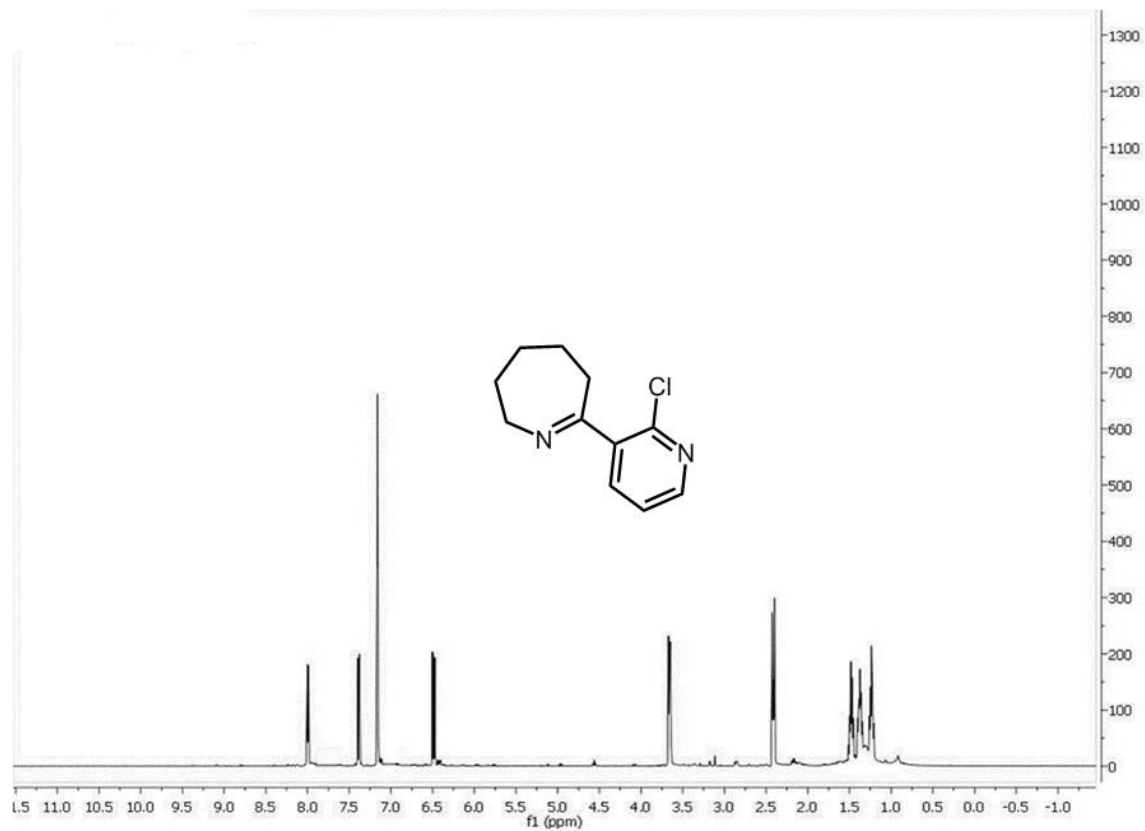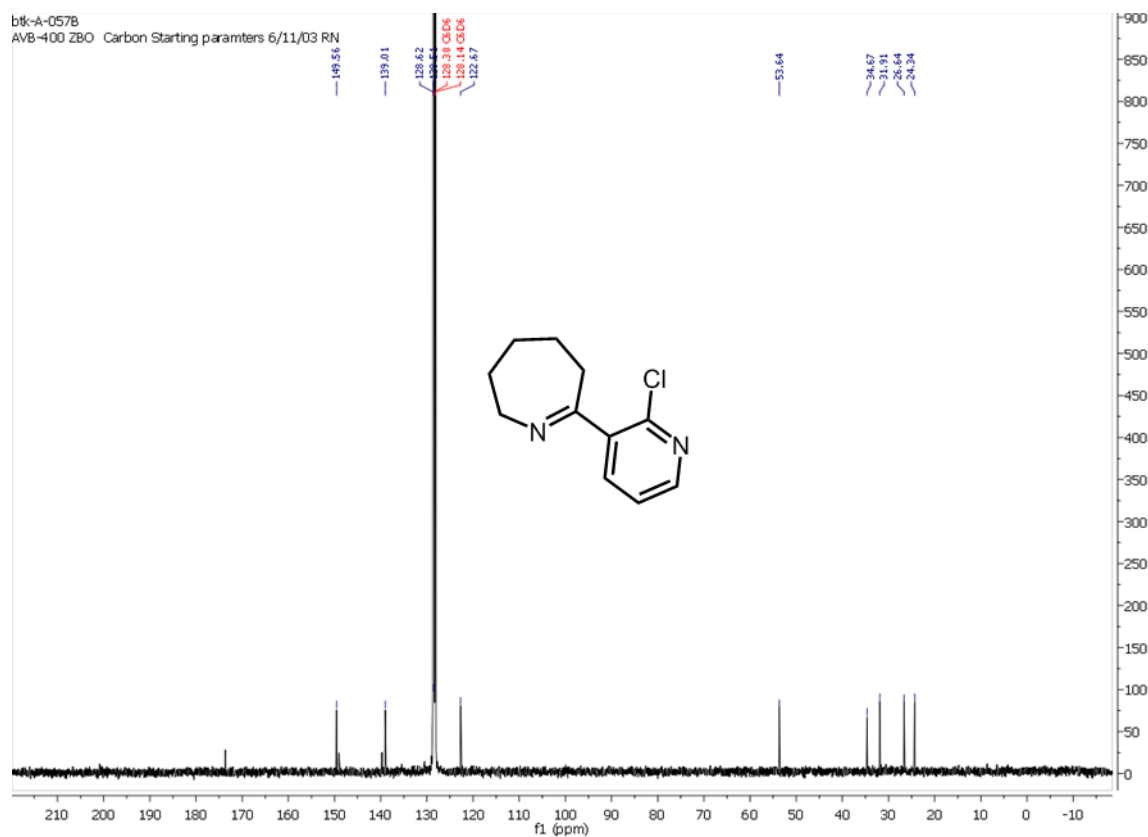

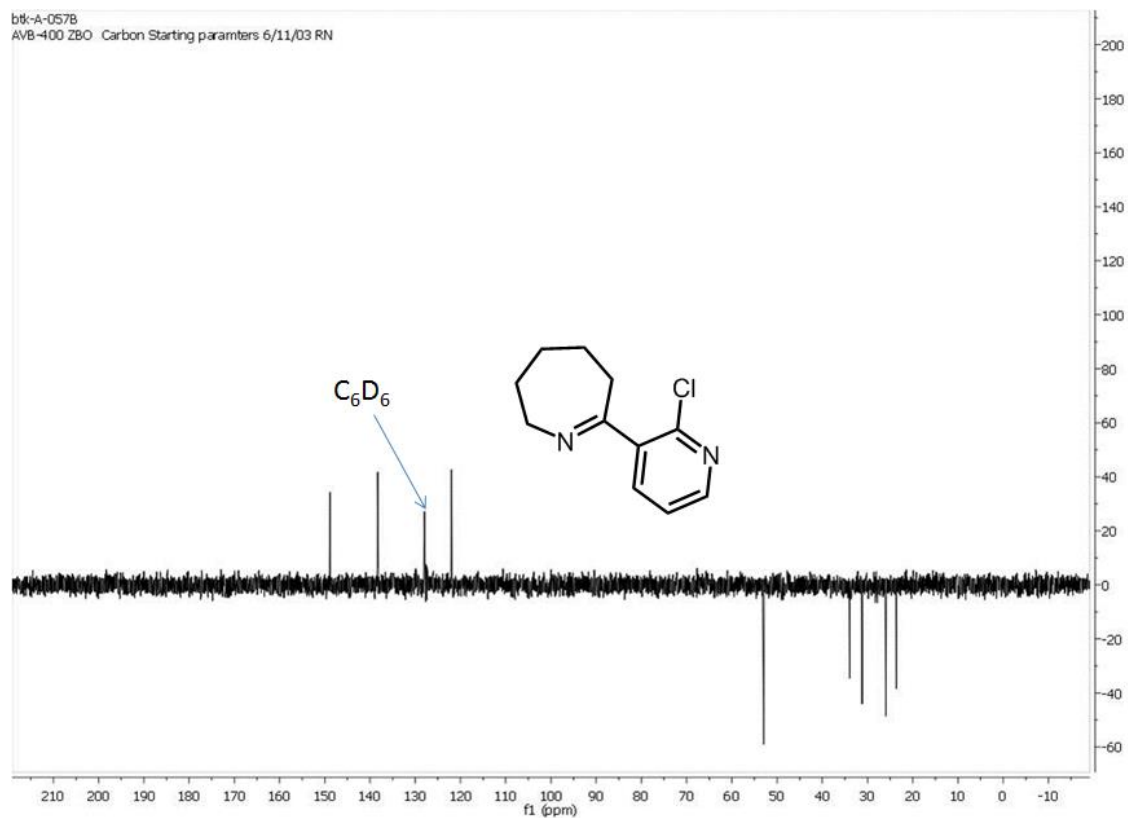



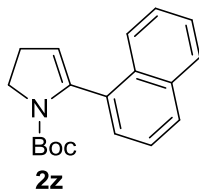

Prepared from **1g** (169 mg, 1.0 mmol) and 1-naphthyl boronic acid (258 mg, 1.5 equiv), using **General Procedure A**. Time = 12 h. Purification: Flash chromatography on silica (pretreated with 1% Et<sub>3</sub>N) eluting with PE/DCM (1:1). Yield = 79%. <sup>1</sup>H NMR (300 MHz, CDCl<sub>3</sub>, mixture of rotamers) δ 8.23–7.37 (7H), 5.23 (1H), 4.26 (2H), 2.81 (2H), 1.01 – 0.61 (9H) <sup>13</sup>C NMR (75.5 MHz, CDCl<sub>3</sub>) δ = 155.4, 142.1, 141.8, 134.0, 131.5, 128.9, 127.3, 125.8, 125.4, 124.9, 123.5, 123.2, 112.2, 79.8, 48.2, 28.8, 28.3. HRMS calc for C<sub>19</sub>H<sub>21</sub>NO<sub>2</sub> 295.1572, found 295.1569.

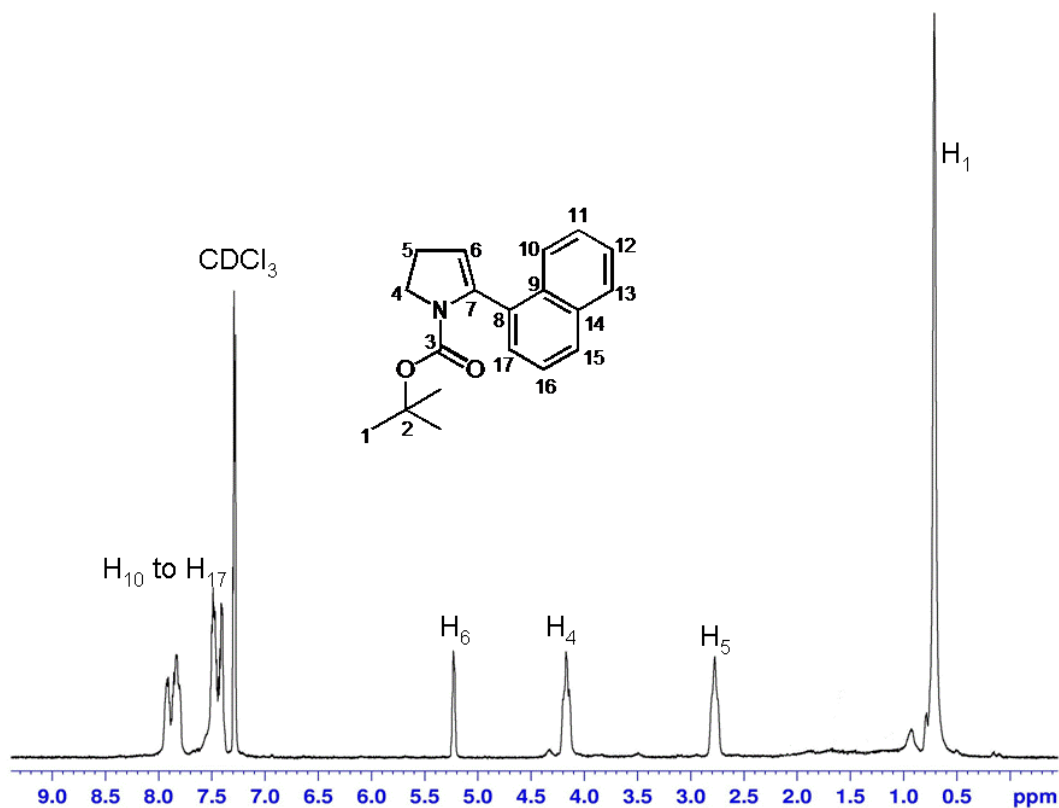

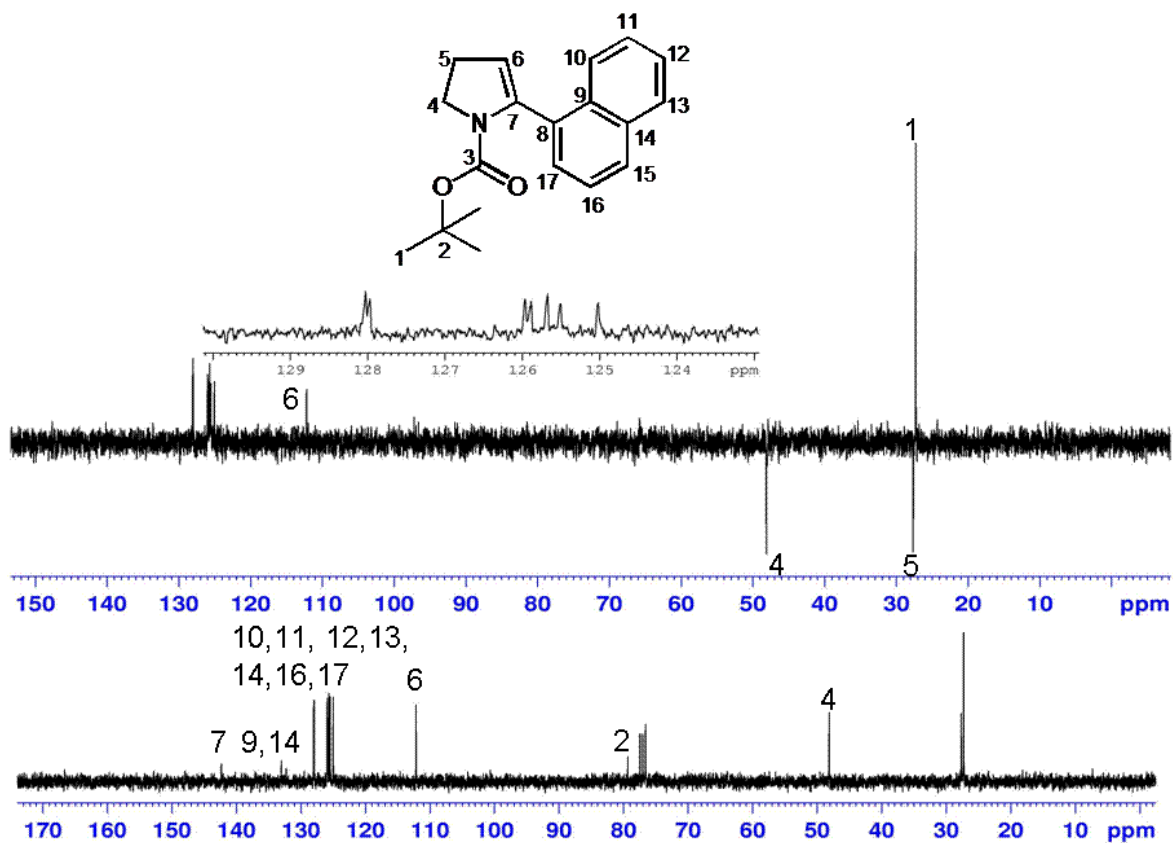

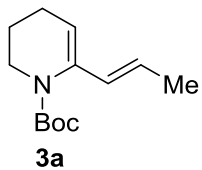

Prepared from **1c** (183 mg, 1.0 mmol) and 1-propenylboronic acid (2 equiv), using **General Procedure A**. Purification: Flash chromatography on silica (pretreated with 1% Et<sub>3</sub>N) eluting with PE/DCM (2:1). Yield = 154 mg; 69%. Data as previously reported by us.<sup>1</sup>

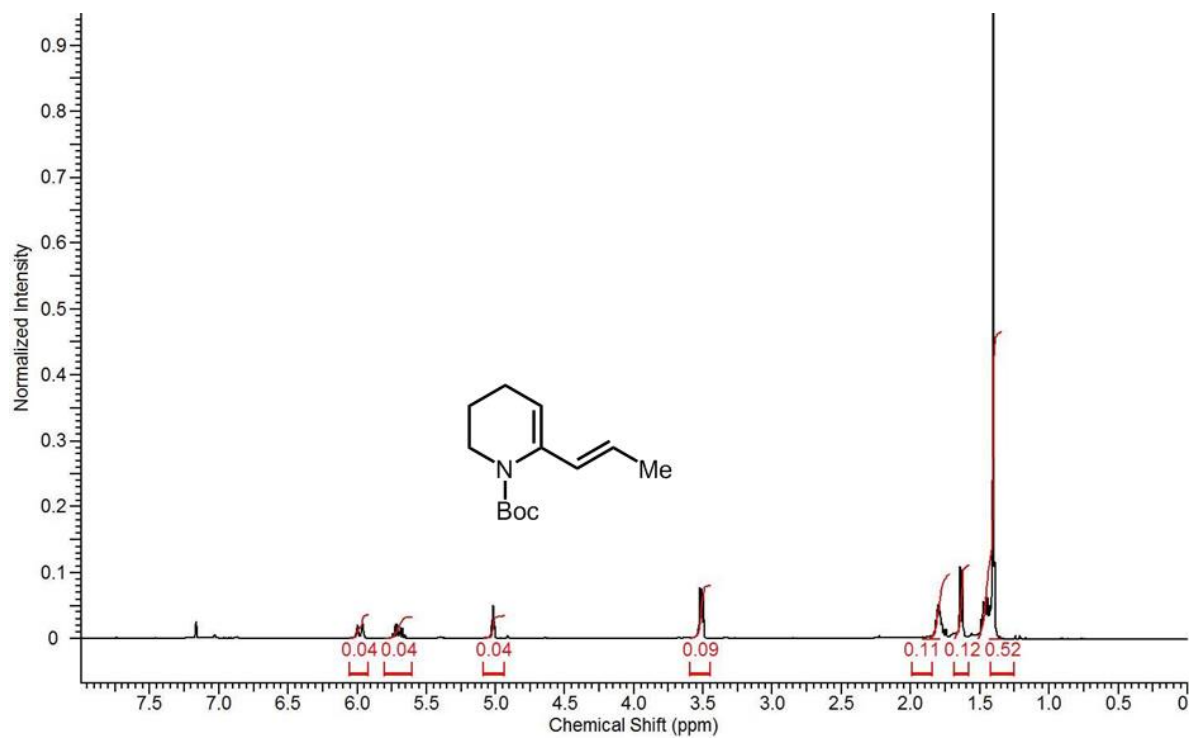

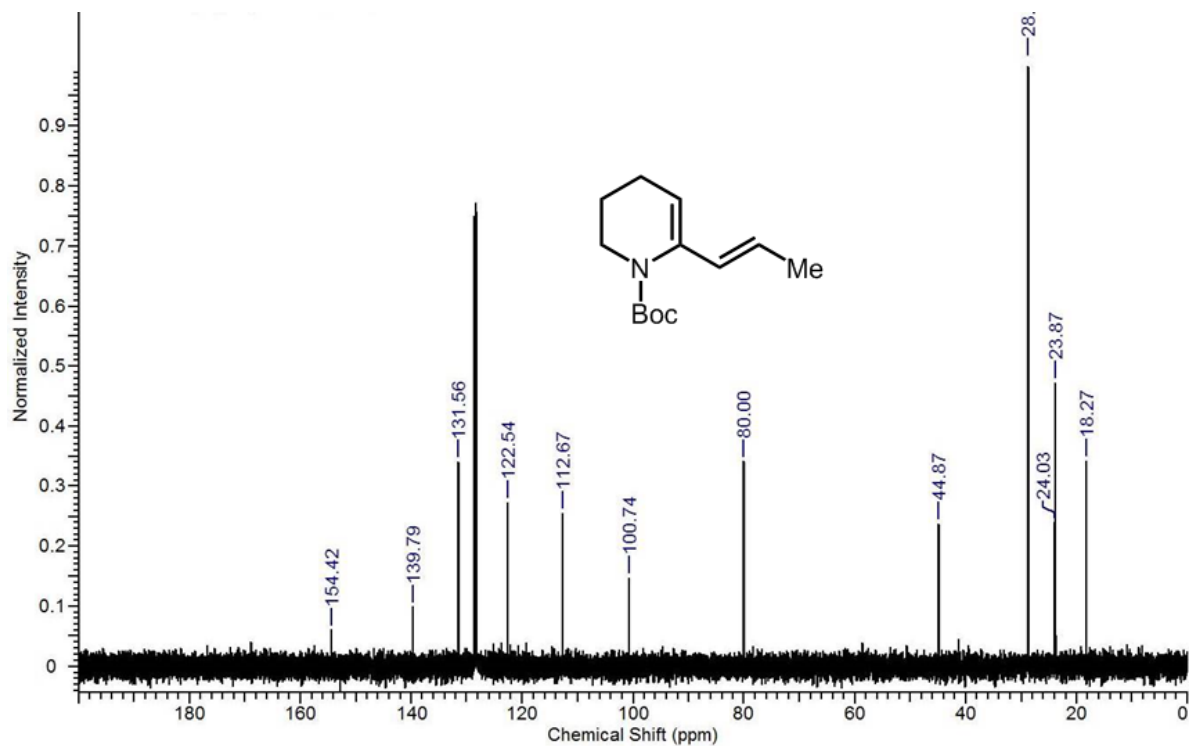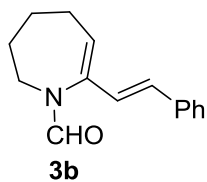

Prepared from **1f** (125 mg, 1 mmol) and  $\beta$ -styrenylboronic acid (2 equiv) using **Procedure A**. Time = 32 h. Purification: Flash chromatography on silica (pretreated with 1% Et<sub>3</sub>N) eluting with hexane/EtOAc (90:10). Yield = 136 mg, 60%. Data as previously reported by us.<sup>4</sup>

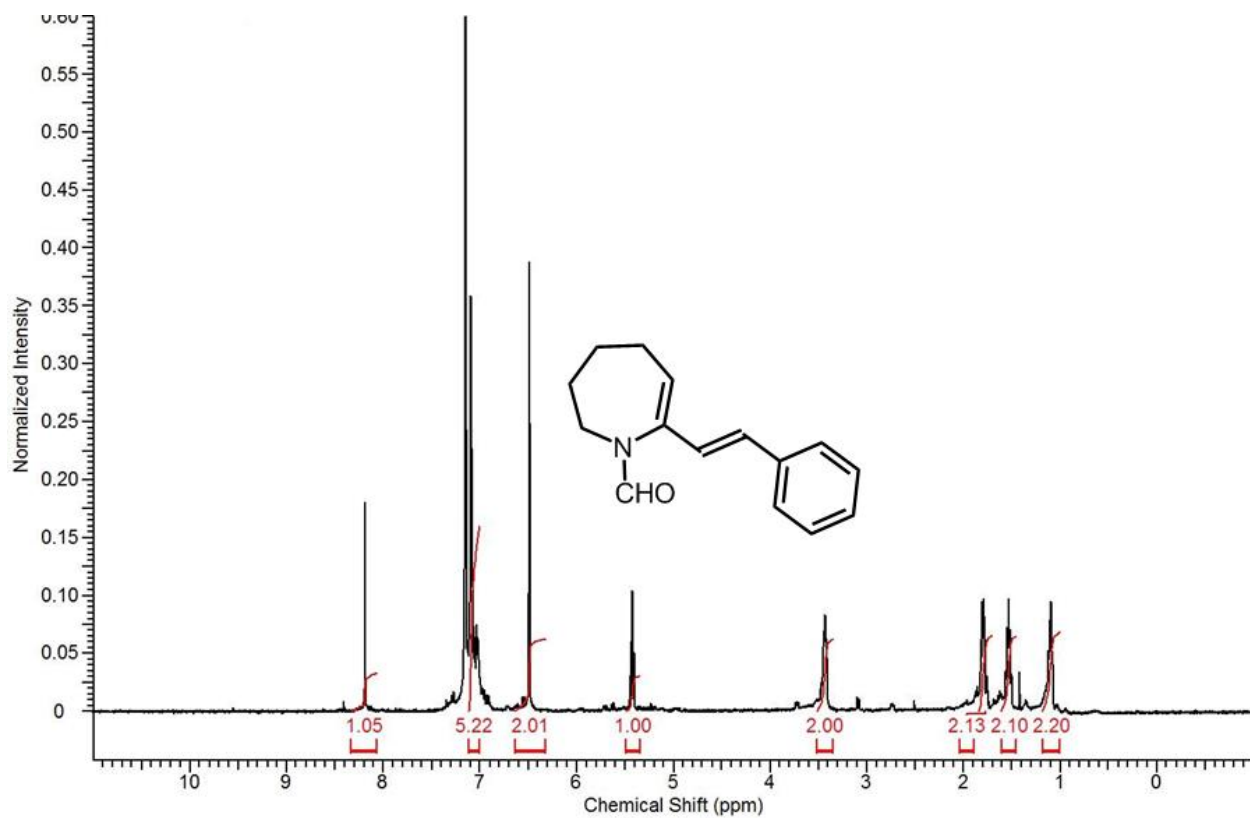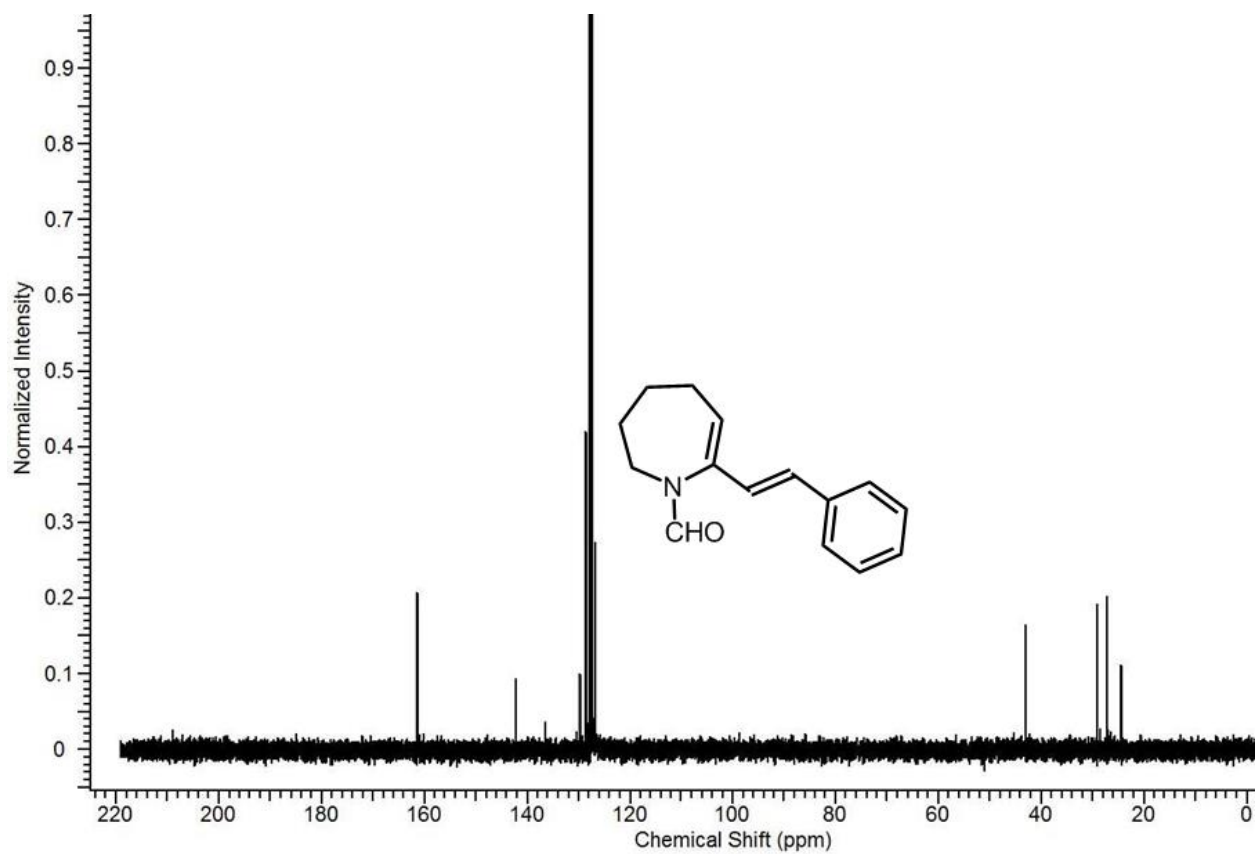

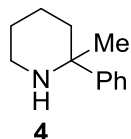

### Imine formation

To eneformamide **2a** (47 mg, 0.25 mmol, 1.0 equiv) dissolved in freshly distilled THF (5 mL) was added *n*-BuLi (0.15 mL, 0.30 mmol, 2.0 M in hexanes, 1.2 equiv) at  $-78$  °C. After complete deprotection of the eneformamide (~30 min, as indicated by TLC and LCMS-monitoring), the mixture was quenched with H<sub>2</sub>O and diluted with EtOAc. It was washed with *sat.* NaHCO<sub>3</sub> and then with brine. The organic layer was dried over Na<sub>2</sub>SO<sub>4</sub> and concentrated under reduced pressure to give the crude product as an oil.

### Grignard addition

To the crude imine dissolved in freshly distilled THF (2 mL), was slowly added methyl magnesium bromide (0.1 mL, 3.0 M solution in Et<sub>2</sub>O, 1.2 equiv) under nitrogen at 0 °C. The mixture was stirred for 10 min at 0 °C, then warmed slowly to room temperature. After complete consumption of the imine (as indicated by TLC and LC-MS, ~12 h), the mixture was cooled to 0 °C, diluted with Et<sub>2</sub>O. Water was then added slowly and the layers were separated. The aqueous layer was extracted twice with Et<sub>2</sub>O and the combined organic layers were dried over Na<sub>2</sub>SO<sub>4</sub> for 30 min, filtered, and concentrated under reduced pressure to give the desired product. Purification: Flash chromatography on silica (pretreated with 1% Et<sub>3</sub>N) eluting with Hexane/EtOAc (1:2). Yield = 39 mg; 88%. Data as reported.<sup>5</sup>

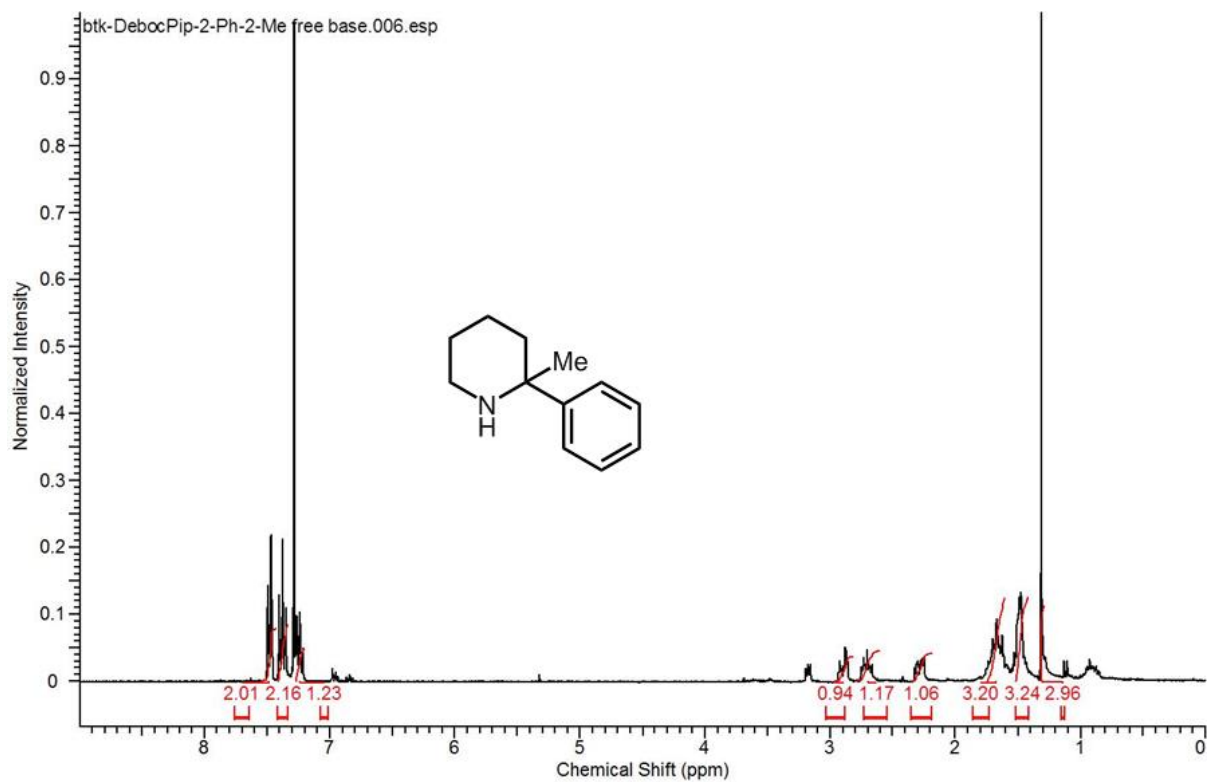

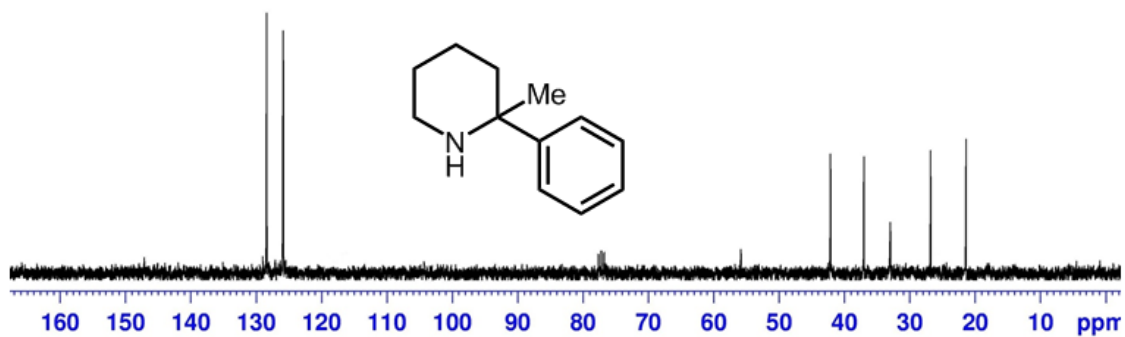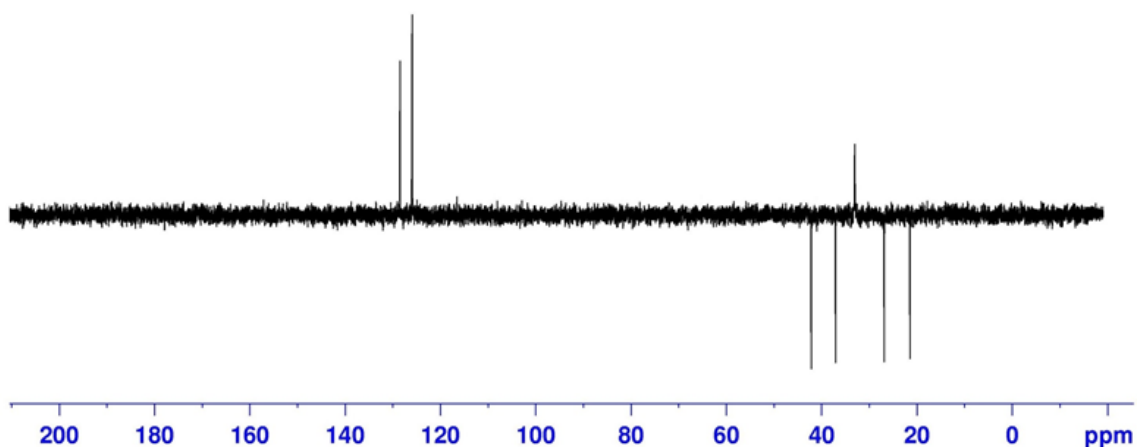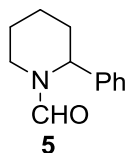

Prepared from **2a** (47 mg, 0.25 mmol), 10% Pd/C (100 mg) and EtOAc (5 mL), using **General Procedure B**. Time = 18 h. Yield = 46 mg, 99%.  $^1\text{H}$  NMR (400 MHz,  $\text{C}_6\text{D}_6$ , mixture of rotamers)  $\delta$  7.96 (1H, s) 7.19 to 6.90 (5H), 5.80 (0.5H, dd), 4.20 to 4.15 (0.5H, dd), 4.04 (0.5 H, dd), 2.60 to 2.40 (1.5, m), 1.91 to 1.78 (1H, m) 1.39 to 0.89 (5H, m).  $^{13}\text{C}$  NMR (101 MHz,  $\text{C}_6\text{D}_6$ )  $\delta$  161.4, 161.1, 129.4, 128.6, 128.5, 127.9, 127.6, 127.4, 126.8, 126.7, 126.4, 115.7, 56.0, 49.1, 42.0, 37.0, 28.9, 26.6, 26.2, 24.8, 20.3, 19.8. HRMS calc for  $\text{C}_{12}\text{H}_{15}\text{NO}$  189.1154, found 189.1157.



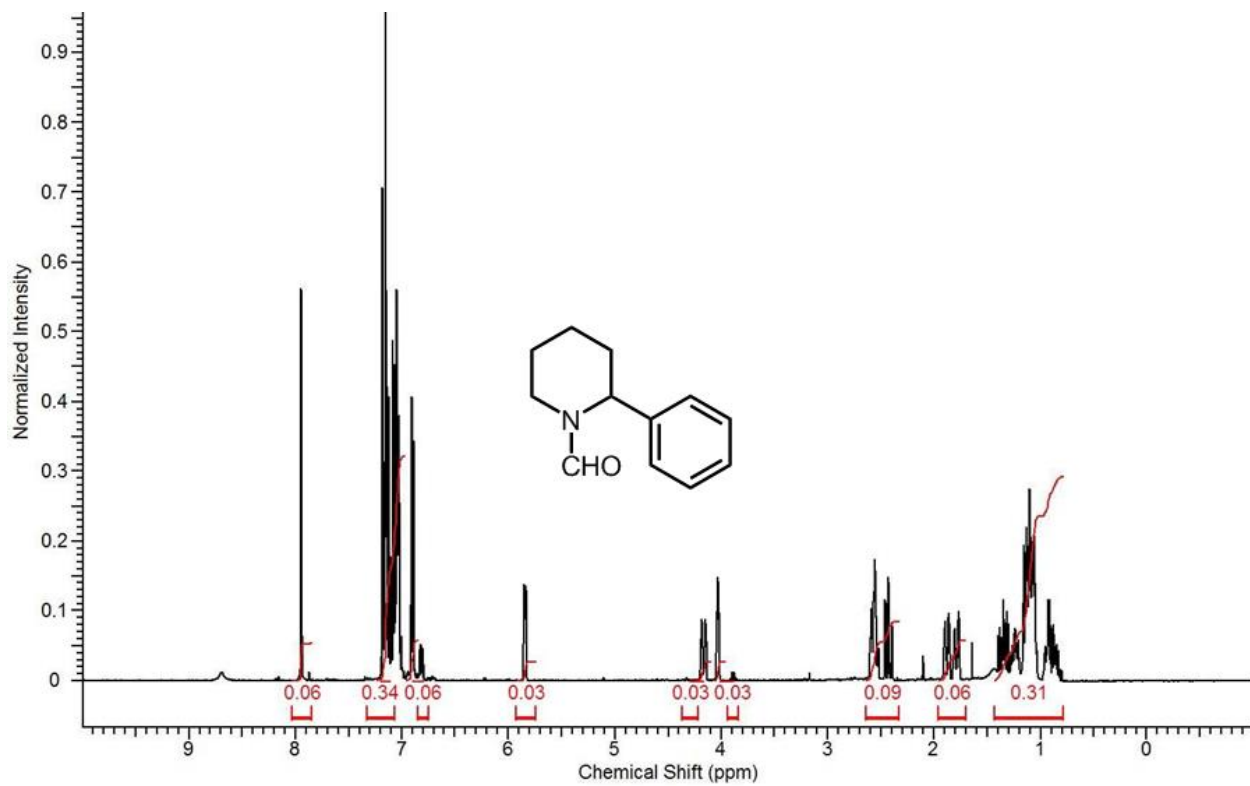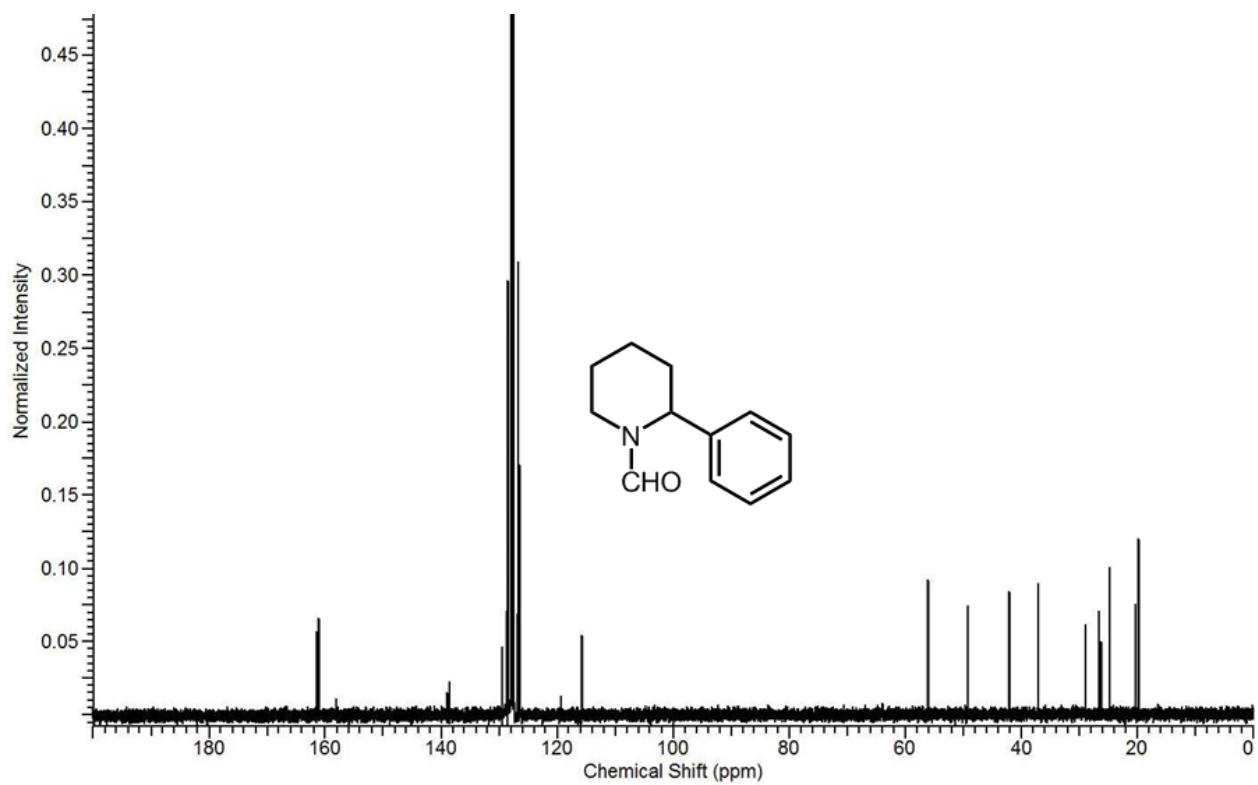

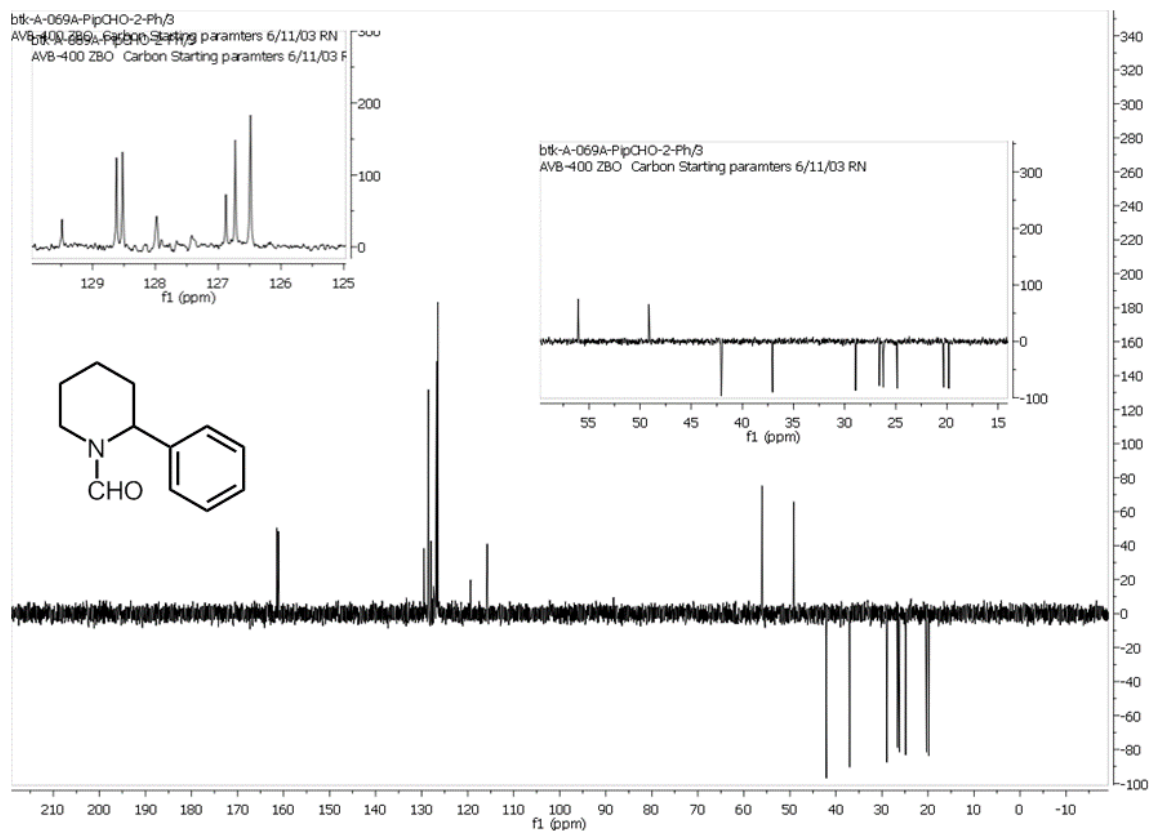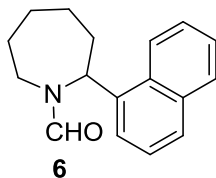

Prepared from **2x** (63 mg, 0.25 mmol), 10% Pd/C (100 mg) and EtOAc (5 mL), using **General Procedure B**. Time = 18 h. Yield = 60 mg, 94%.  $^1\text{H}$  NMR (400 MHz,  $\text{CDCl}_3$ , mixture of rotamers)  $\delta$  8.37 to 7.28 (16H), 6.06 to 6.02 (1H), 5.45 to 5.41 (1H), 4.58 to 4.53 (1H), 3.98 to 3.93 (1H), 3.69 to 3.62 (1H), 3.32 to 3.25 (1H), 2.78 to 2.67 (1H), 2.63 to 2.56 (1H), 2.16 to 1.30 (14H).  $^{13}\text{C}$  NMR (101 MHz,  $\text{C}_6\text{D}_6$ )  $\delta$  163.8, 163.0, 154.0, 139.7, 139.7, 134.1, 134.0, 131.0, 130.0, 129.0, 128.7, 126.0, 126.0, 125.5, 125.5, 125.5, 125.1, 123.4, 122.7, 122.2, 121.2, 108.4, 58.6, 53.8, 45.1, 41.1, 34.9, 34.3, 32.4, 29.4, 29.1, 28.7, 26.2, 26.1. HRMS calc for  $\text{C}_{17}\text{H}_{19}\text{NO}$  253.1467, found 253.1470.

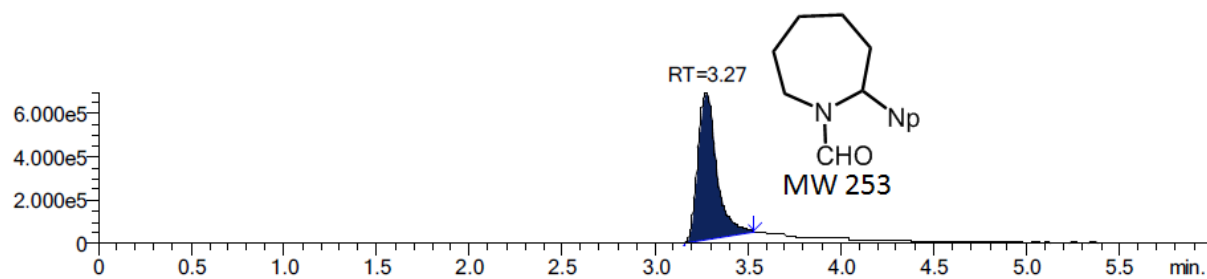

**MS Spectrum**

Group#1 - MS Mass(254) Peak: 26, RT: 3.14 to 3.48 min

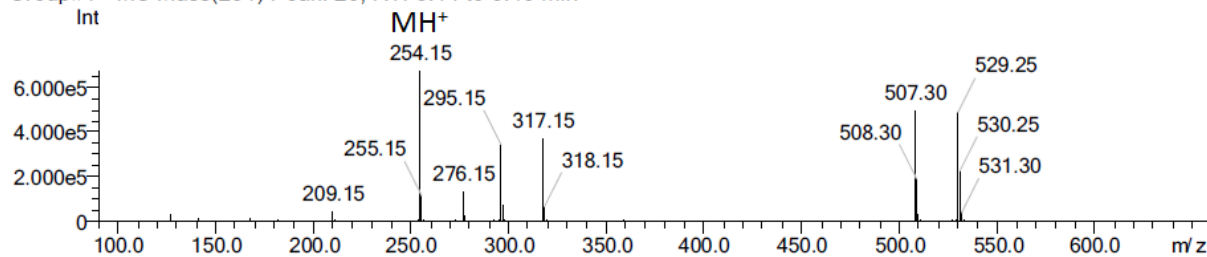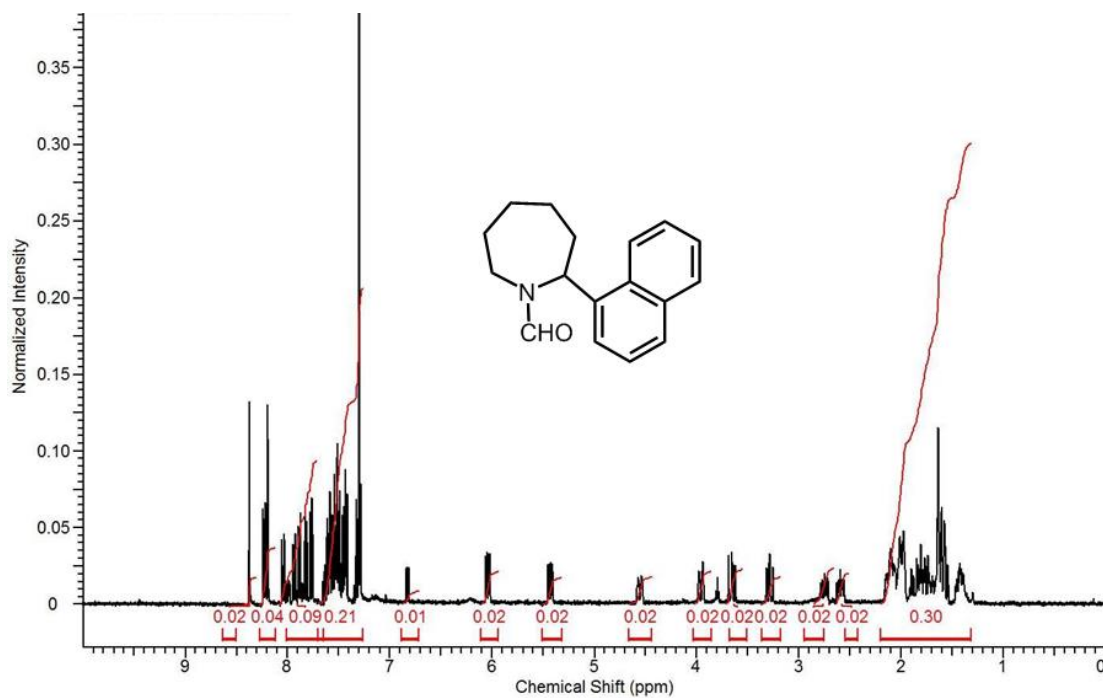

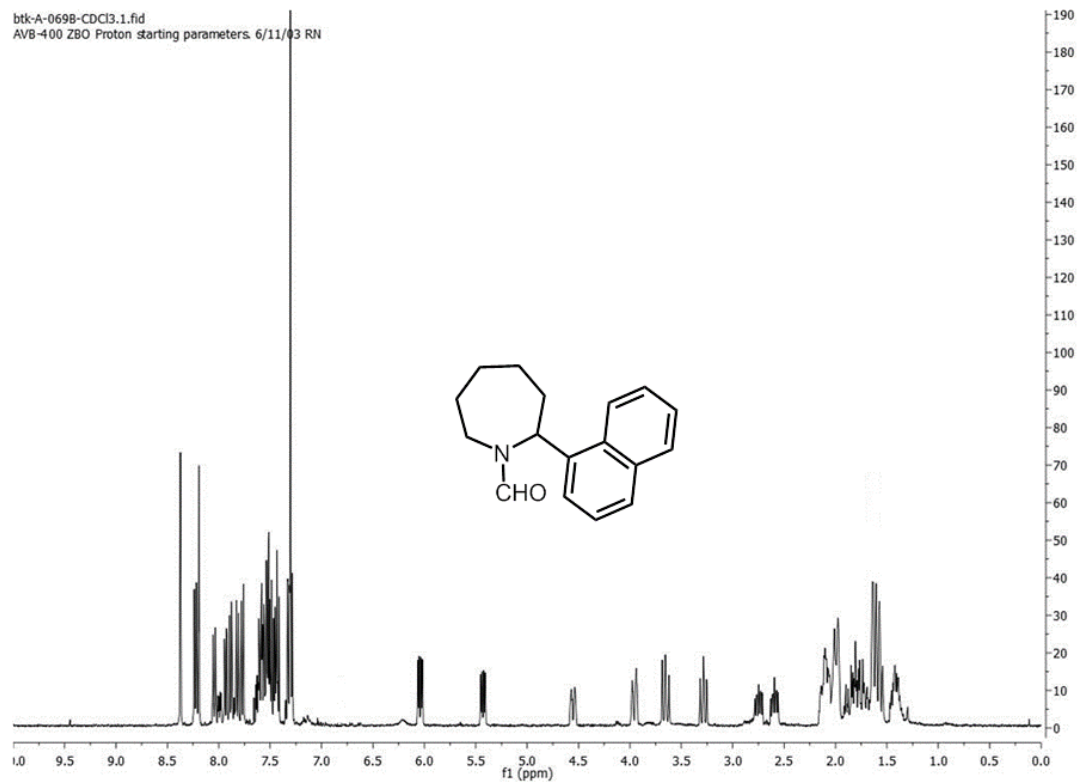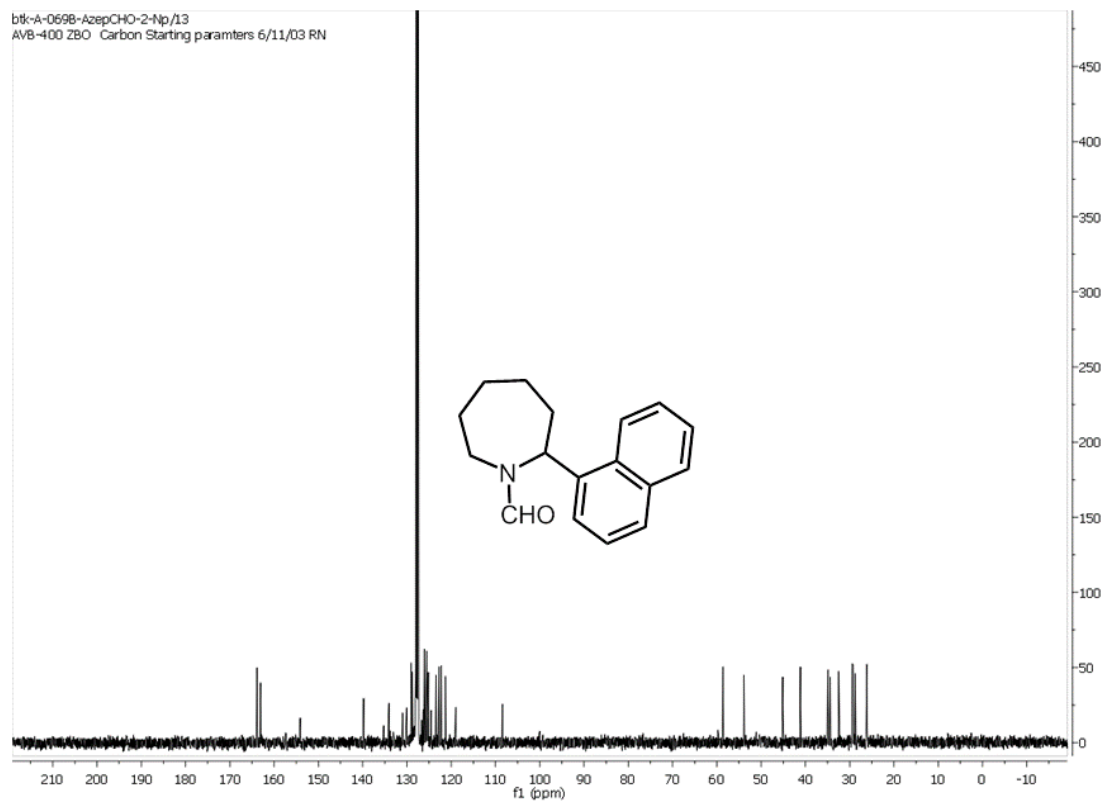

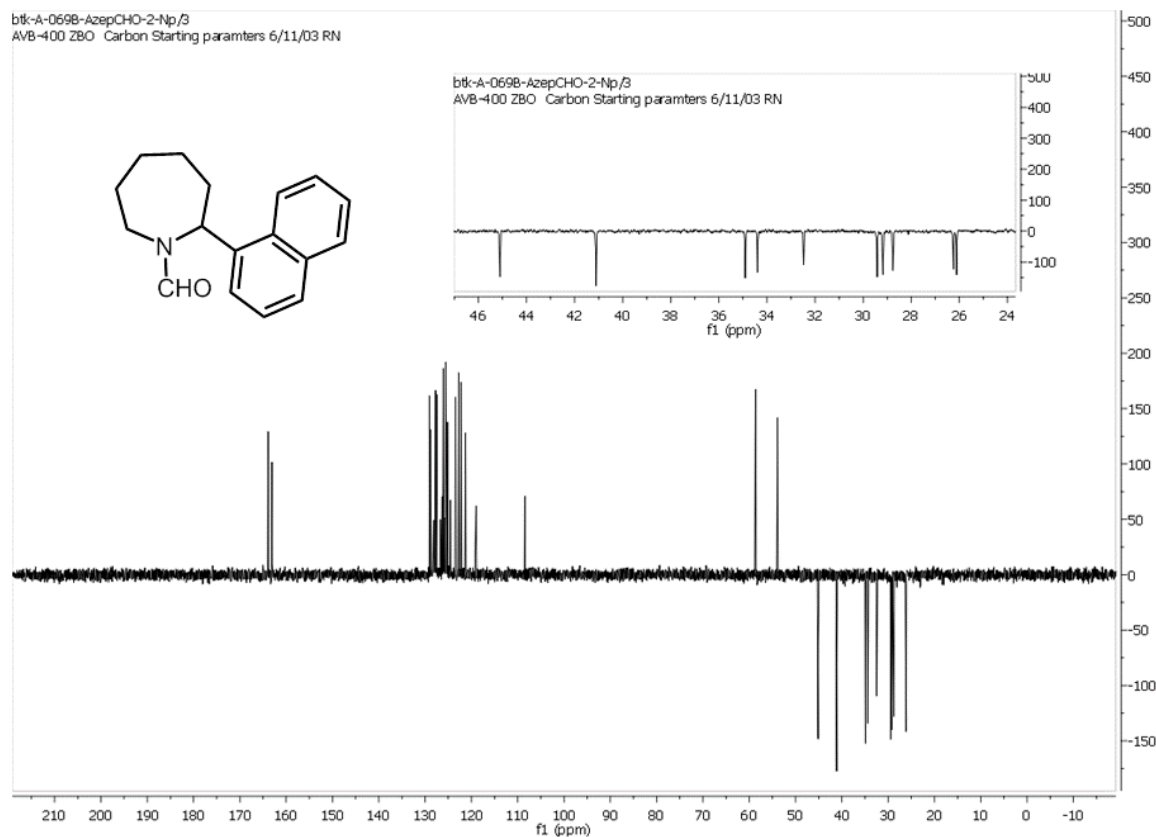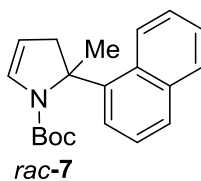

### Catalytic Hydrogenation:

Encarbamate **2z** (1 mmol) was hydrogenated **General Procedure B**, time = 22 h.

### Benzylic lithiation/methylation

To an oven-dried, septum-capped round bottom flask equipped with a stir bar, was added freshly distilled TMEDA (0.2 mL, 1.2 mmol, 1.2 equiv) and a solution of the reduced encarbamate (1 mmol, 1.0 equiv) in THF (6 mL) under nitrogen. The mixture was cooled to  $-60\text{ }^{\circ}\text{C}$  and a solution of *n*-BuLi (1.0 mL, 2.0 M in hexanes, 2.0 mmol, 2.0 equiv) was added slowly. After 2 h at this temperature, dimethylsulfate (3 equiv) was added and the mixture was allowed to stir for 10 h at this temperature prior to the addition of MeOH (0.2 mL) and warming to room temperature. A solution of  $\text{NH}_4\text{Cl}$  (2 mL) was added and the aqueous layer was extracted with

Et<sub>2</sub>O. The combined organic layers were dried over Na<sub>2</sub>SO<sub>4</sub> and evaporated to give the crude quaternary pyrrolidine.

**Lithiation-transmetalation-oxidation:**

To an oven-dried, septum-capped round bottom flask equipped with a stir bar, was added a solution of the disubstituted pyrrolidine (156 mg, 0.5 mmol, 1.0 equiv) in THF (5 mL) and TMEDA (0.09 mL, 0.6 mmol, 1.2 equiv). The solution was cooled to -60 °C and *s*-BuLi (0.60 mL, 1.0 M solution in cyclohexane, 0.60 mmol, 1.2 equiv) was added slowly. After 1 h, a solution of ZnCl<sub>2</sub> (0.7 mL, 1.0 M solution in THF, 0.7 mmol, 1.4 equiv) was added. After 30 min, a solution of I<sub>2</sub> in THF (1.5 mL, 1.0 M, 3.0 equiv) was added slowly. The mixture was allowed to stir for 1 h at this temperature before warming to room temperature slowly. After 18 h, a solution of 10% NH<sub>4</sub>OH(aq) was added slowly and the mixture was stirred for 20 min. The layers were separated and the aqueous layer was extracted with Et<sub>2</sub>O. The combined organic layers were washed with saturated Na<sub>2</sub>S<sub>2</sub>O<sub>3</sub>(aq) and dried with for ~30 min with Na<sub>2</sub>SO<sub>4</sub>, filtered and evaporated to give crude **7**. **Purification:** Flash chromatography on silica (pretreated with 1% Et<sub>3</sub>N) eluting with PE/DCM. Yield: 110 mg (71%). <sup>1</sup>H NMR (400 MHz, CDCl<sub>3</sub>, mixture of rotamers) δ 8.20 to 7.46 (7H), 6.93 (1H), 5.26 (1H), 3.42 to 3.21 (1H), 2.71 to 2.53 (1H), 1.91 (3H), 1.32 and 0.71 (9H), <sup>13</sup>C NMR (101 MHz, CDCl<sub>3</sub>, mixture of rotamers) δ 153.5, 141.4, 135.2, 130.2, 129.5, 128.4, 127.8, 125.6, 124.9, 124.6, 124.3, 124.0, 105.1, 78.9, 66.9, 48.1, 28.9, 27.7. HRMS calc for C<sub>20</sub>H<sub>23</sub>NO<sub>2</sub> 309.1729, found 309.1731.

*Caution: Enecarbamate 7 is acid labile and should be stored in the refrigerator.*

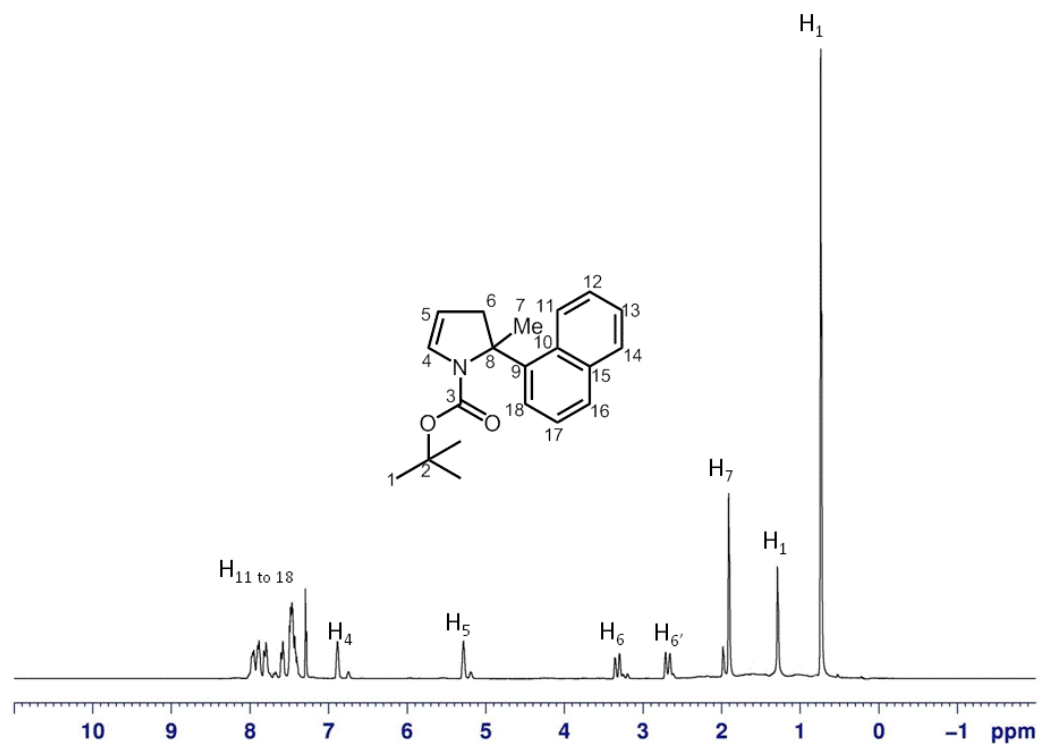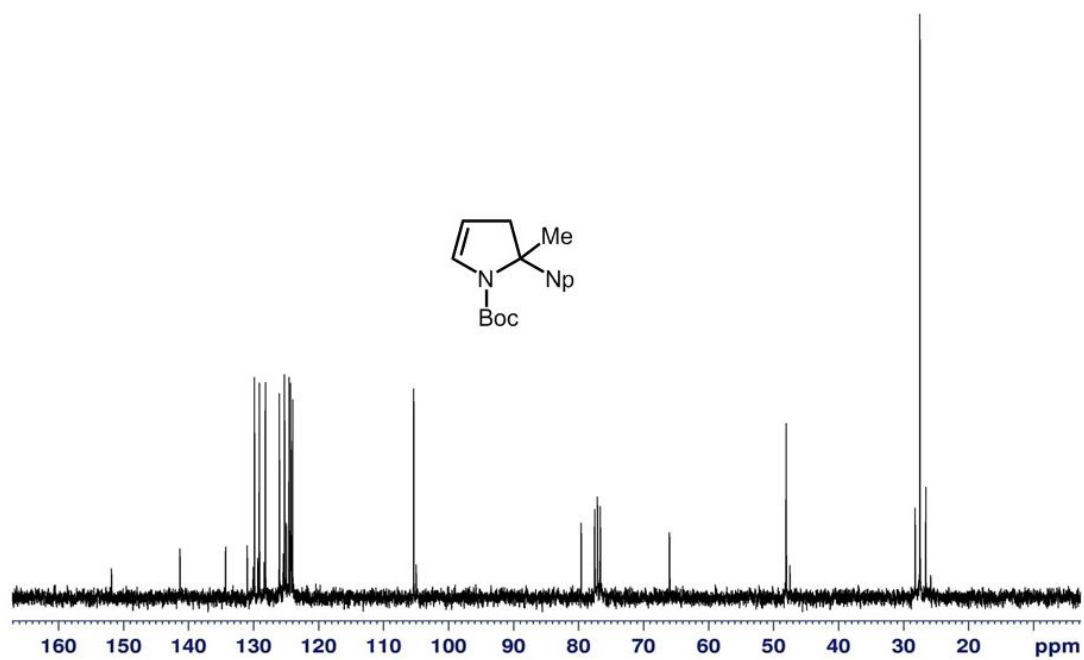

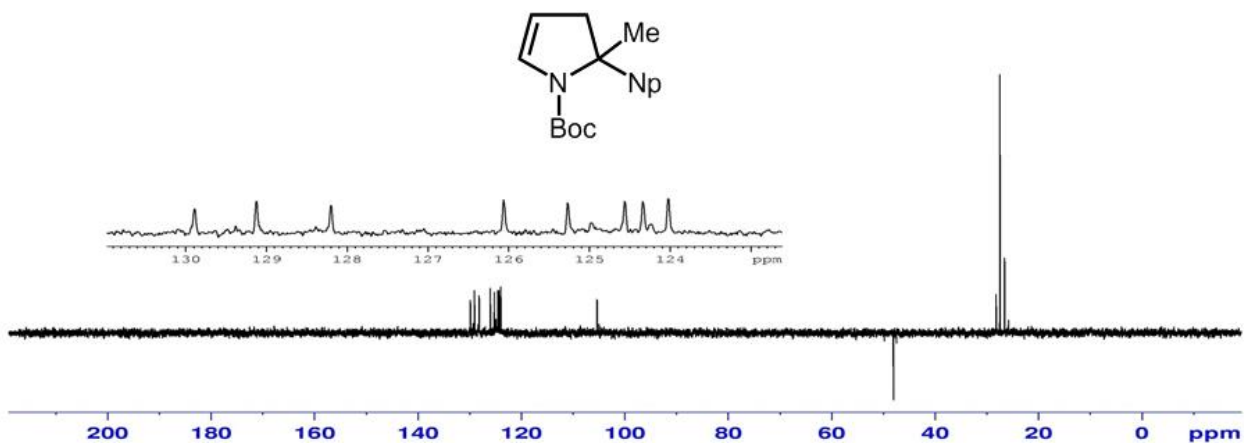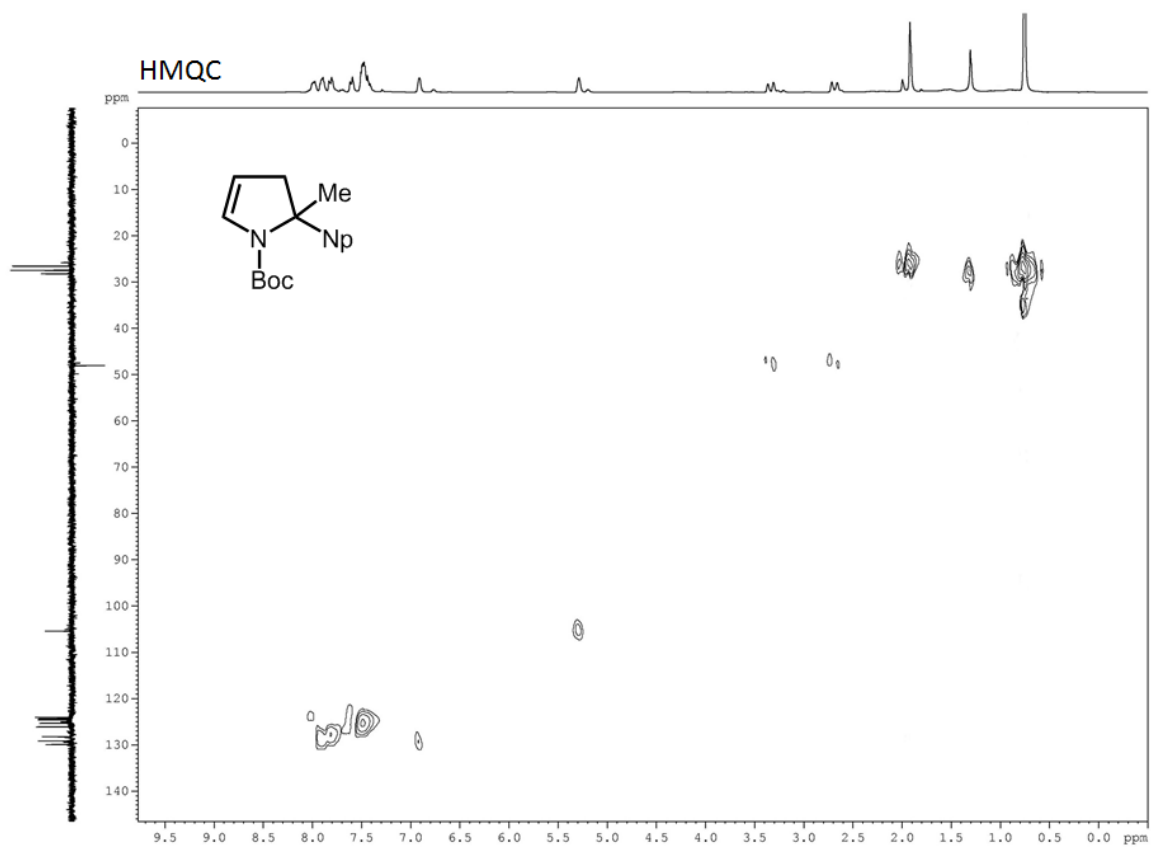



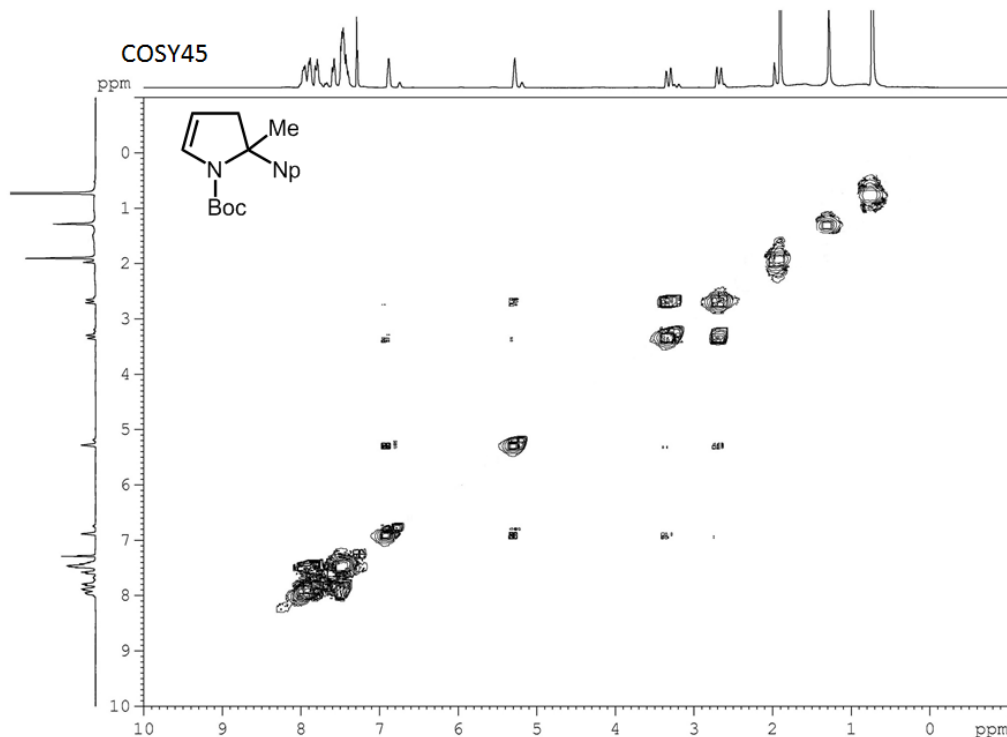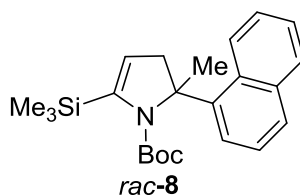

To an oven-dried, septum-capped round bottom flask equipped with a stir bar, was added freshly distilled TMEDA (0.05 mL, 0.5 mmol, 1.2 equiv) and a solution of enecarbamate **7** (78 mg, 0.25 mmol, 1.0 equiv) in THF (2 mL) under argon. The mixture was cooled to  $-60\text{ }^{\circ}\text{C}$  and a solution of *n*-BuLi (0.12 mL, 2.5 M in hexanes, 0.3 mmol, 1.2 equiv) was added slowly. After 1 to 3 h at this temperature, the mixture was quenched with TMSCl (0.1 mL, 3 equiv). The mixture was slowly warmed to room temperature and *sat.*  $\text{NH}_4\text{Cl}$  was added. The layers were separated and the aqueous layer was extracted with  $\text{Et}_2\text{O}$ . The combined organic layers were dried over  $\text{Na}_2\text{SO}_4$ , filtered and evaporated to obtain the crude product. **Purification:** Flash chromatography on silica (pretreated with 1%  $\text{Et}_3\text{N}$ ) eluting with petroleum ether-DCM (1:1). Yield = 84 mg, 88% yield.  $^1\text{H}$  NMR (400 MHz,  $\text{CDCl}_3$ , mixture of rotamers)  $\delta$  7.97 to 7.29 (7H), 5.50 (1H), 3.23 to 3.15 (1H), 2.72 to 2.61 (1H), 1.85 (3H), 0.77 (9H), 0.15 (9H),  $^{13}\text{C}$  NMR (101 MHz,  $\text{CDCl}_3$ , mixture of rotamers)  $\delta$  154.3, 141.6, 134.8, 130.6, 129.5, 127.7, 125.9, 124.7, 124.2,

123.8, 124.1, 118.5, 79.3, 67.2, 49.6, 27.8, 26.4, 0.2. HRMS calc for  $C_{23}H_{31}NO_2Si$  381.2124 found 381.2122.

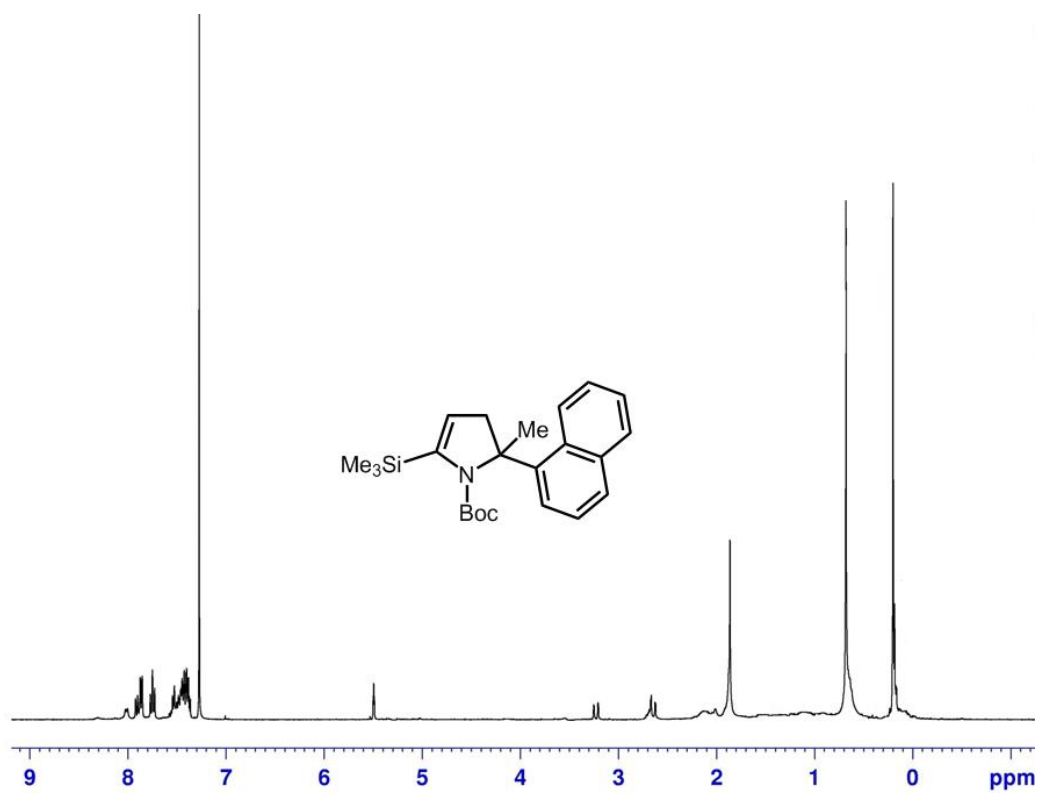

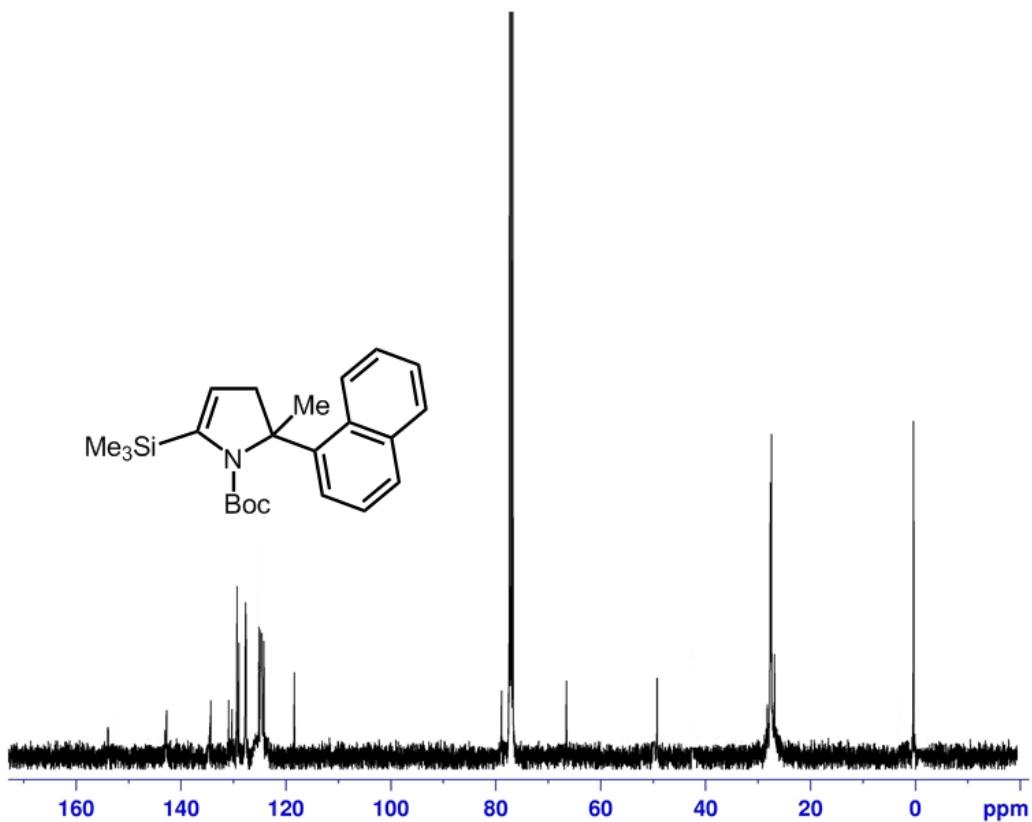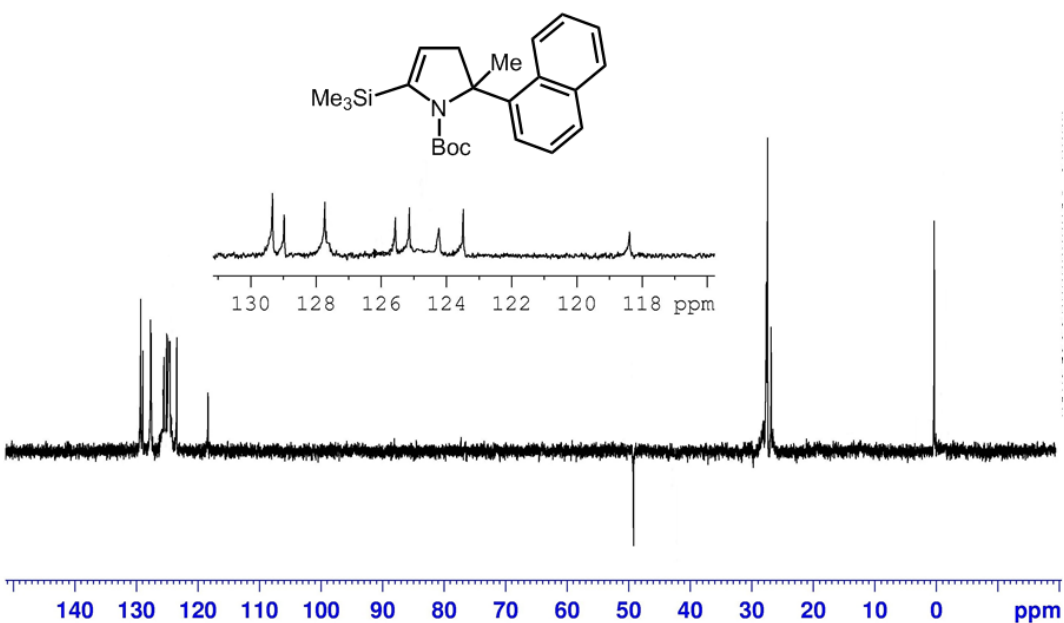

## References

- (1) Bassler, D. P.; Alwali, A.; Spence, L.; Beale, O.; Beng, T. K. *J. Organomet. Chem.* **2015**, *780*, 6.
- (2) Occhiato, E. G.; Trabocchi, A.; Guarna, A. *J. Org. Chem.* **2001**, *66*, 2459.
- (3) Beng, T. K.; Silaire, A. W. V.; Alwali, A.; Bassler, D. P. *Org. Biomol. Chem.* **2015**, *13*, 7915.
- (4) Beng, T. K.; Wilkerson-Hill, S. M.; Sarpong, R. *Org. Lett.* **2014**, *16*, 916.
- (5) Bagutski, V.; Elford, T. G.; Aggarwal, V. K. *Angew. Chem., Int. Ed.* **2011**, *50*, 1080.
